# Supplementary material for: Sequential Insertion of Alkynes, Alkenes, and CO into the Pd–C Bond of ortho-Palladated Primary Phenethylamines: from η3-Allyl Complexes and Enlarged Palladacycles to Functionalized Arylalkylamines
Source: PubMed Central journal article supplement (PMC8895685; doi:10.1021/acs.organomet.0c00787), 2021-01-29
Supplement: om0c00787_si_001.pdf [file om0c00787_si_001.pdf]

## SUPPORTING INFORMATION FOR

# Sequential Insertion of Alkynes, Alkenes and CO into the Pd–C Bond of *ortho*-Palladated Primary Phenethylamines: from $\eta^3$ -Allyl Complexes and Enlarged Palladacycles to Functionalized Arylalkylamines

José-Antonio García-López,<sup>\*a</sup> María-José Oliva-Madrid,<sup>a</sup> Delia Bautista,<sup>b</sup> José  
Vicente,<sup>a</sup> and Isabel Saura-Llamas<sup>\*a</sup>

<sup>a</sup>Grupo de Química Organometálica, Departamento de Química Inorgánica,  
Facultad de Química, Universidad de Murcia, E-30100 Murcia, Spain. <sup>b</sup>ACTI,  
Universidad de Murcia, E-30100 Murcia, Spain



|                                                                                                                                                                                                          |     |
|----------------------------------------------------------------------------------------------------------------------------------------------------------------------------------------------------------|-----|
| <b>Table S1.</b> Crystal data and structure refinement details for complexes<br><i>anti-1a</i> , <i>anti-1b</i> , <i>syn-1b</i> , and <i>anti-2a</i> ·CH <sub>2</sub> Cl <sub>2</sub> .....              | S5  |
| <b>Table S2.</b> Crystal data and structure refinement details for complexes<br><i>syn-2a</i> , <i>anti-2b</i> ·CHCl <sub>3</sub> , <i>syn-2b</i> , and <i>3b</i> ·CH <sub>2</sub> Cl <sub>2</sub> ..... | S6  |
| <b>Table S3.</b> Crystal data and structure refinement details for compounds<br><b>6b</b> ·H <sub>2</sub> O, <b>7c</b> ·CHCl <sub>3</sub> , <b>7d</b> ·1/2CHCl <sub>3</sub> , and <b>7f</b> .....        | S7  |
| <b>Table S4.</b> Crystal data and structure refinement details for compounds<br><b>8f</b> , <b>9d</b> , <b>9f</b> ·Et <sub>2</sub> O, and <b>10c</b> ·H <sub>2</sub> O .....                             | S8  |
| <b>Figure S1.</b> X-ray thermal ellipsoid plot of complex <i>anti-1b</i> .....                                                                                                                           | S9  |
| <b>Figure S2.</b> X-ray thermal ellipsoid plot of complex <i>syn-1b</i> .....                                                                                                                            | S10 |
| <b>Figure S3.</b> X-ray thermal ellipsoid plot of complex <i>anti-2a</i> ·CH <sub>2</sub> Cl <sub>2</sub> .....                                                                                          | S11 |
| <b>Figure S4.</b> X-ray thermal ellipsoid plot of complex <i>syn-2a</i> .....                                                                                                                            | S12 |
| <b>Figure S5.</b> X-ray thermal ellipsoid plot of complex <i>anti-2b</i> ·CHCl <sub>3</sub> .....                                                                                                        | S13 |
| <b>Figure S6.</b> X-ray thermal ellipsoid plot of one (A') of the two independent molecules<br>of complex <i>syn-3b</i> ·CH <sub>2</sub> Cl <sub>2</sub> .....                                           | S14 |
| <b>Figure S7.</b> X-ray thermal ellipsoid plot of complex <b>7d</b> ·1/2CHCl <sub>3</sub> .....                                                                                                          | S15 |
| <b>Figure S8.</b> X-ray thermal ellipsoid plot of complex <b>7f</b> .....                                                                                                                                | S16 |
| <b>Figure S9.</b> X-ray thermal ellipsoid plot of the cation of compound <b>9d</b> .....                                                                                                                 | S17 |
| <b>Hydrogen bonds data for compounds</b>                                                                                                                                                                 |     |
| <i>anti-1b</i> (Table S5 and Figure S10) .....                                                                                                                                                           | S18 |
| <i>syn-1b</i> (Table S6 and Figure S11) .....                                                                                                                                                            | S19 |
| <i>anti-2a</i> ·CH <sub>2</sub> Cl <sub>2</sub> (Table S7 and Figure S12) .....                                                                                                                          | S20 |
| <i>syn-2a</i> (Table S8 and Figure S13) .....                                                                                                                                                            | S21 |
| <i>anti-2b</i> ·CHCl <sub>3</sub> (Table S9 and Figure S14).....                                                                                                                                         | S22 |
| <i>syn-2b</i> (Table S10 and Figure S15) .....                                                                                                                                                           | S23 |
| <i>syn-3b</i> ·CH <sub>2</sub> Cl <sub>2</sub> (Table S11 and Figures S16 and S17).....                                                                                                                  | S24 |
| <b>6b</b> ·H <sub>2</sub> O (Table S12 and Figure S18).....                                                                                                                                              | S25 |
| <b>7c</b> ·CHCl <sub>3</sub> (Table S13 and Figure S19).....                                                                                                                                             | S26 |
| <b>7d</b> ·1/2CHCl <sub>3</sub> (Table S14 and Figure S20) .....                                                                                                                                         | S27 |
| <b>7f</b> (Table S15 and Figure S21).....                                                                                                                                                                | S28 |
| <b>8f</b> (Table S16 and Figure S22).....                                                                                                                                                                | S29 |
| <b>9d</b> (Table S17 and Figure S23).....                                                                                                                                                                | S30 |
| <b>9f</b> ·Et <sub>2</sub> O (Table S18 and Figure S24).....                                                                                                                                             | S31 |
| <b>10c</b> ·H <sub>2</sub> O (Table S19 and Figure S25) .....                                                                                                                                            | S32 |

## **$^1\text{H}$ and $^{13}\text{C}\{^1\text{H}\}$ APT NMR spectra of compounds**

|                                                            |     |
|------------------------------------------------------------|-----|
| <i>anti/syn-1a</i> (Figures S26 and S27).....              | S33 |
| <i>syn-1a</i> (Figures S28 and S29).....                   | S35 |
| <i>anti-1b</i> (Figures S30 and S31).....                  | S37 |
| <i>syn-1b</i> (Figures S32 and S33).....                   | S39 |
| <i>anti-2a</i> (Figures S34 and S35).....                  | S41 |
| <i>syn-2a</i> (Figures S36 and S37).....                   | S43 |
| <i>anti-2b</i> (Figures S38 and S39).....                  | S45 |
| <i>syn-2b</i> (Figures S40 and S41).....                   | S47 |
| <i>anti/syn-3b</i> (Figures S42, S43, S44 and S45).....    | S49 |
| <b>4a</b> ·1/2H <sub>2</sub> O (Figures S46 and S47).....  | S53 |
| <b>4b</b> (crude) (Figure S48).....                        | S55 |
| <b>5b</b> ·H <sub>2</sub> O (Figures S49 and S50).....     | S56 |
| <b>6d</b> (Figures S51 and S52).....                       | S58 |
| <b>7c</b> ·CHCl <sub>3</sub> (Figures S53 and S54).....    | S60 |
| <b>7d</b> ·1/2CHCl <sub>3</sub> (Figures S55 and S56)..... | S62 |
| <b>7f</b> (Figures S57 and S58).....                       | S64 |
| <b>8f</b> (Figures S59 and S60).....                       | S66 |
| <b>9d</b> (Figures S61 and S62).....                       | S68 |
| <b>9f</b> (Figures S63 and S64).....                       | S70 |
| <b>10c</b> (Figures S65 and S66).....                      | S72 |
| <b>10d</b> (Figures S67 and S68).....                      | S74 |

**Table S1.** Crystal Data and Structure Refinement Details for Complexes *anti-1a*, *anti-1b*, *syn-1b*, and *anti-2a*·CH<sub>2</sub>Cl<sub>2</sub>.

|                                                            | <i>anti-1a</i>                                       | <i>anti-1b</i>                        | <i>syn-1b</i>                         | <i>anti-2a</i> ·CH <sub>2</sub> Cl <sub>2</sub>                      |
|------------------------------------------------------------|------------------------------------------------------|---------------------------------------|---------------------------------------|----------------------------------------------------------------------|
| formula                                                    | C <sub>32</sub> H <sub>32</sub> BrNO <sub>2</sub> Pd | C <sub>32</sub> H <sub>32</sub> ClNPd | C <sub>32</sub> H <sub>32</sub> ClNPd | C <sub>30</sub> H <sub>34</sub> BrCl <sub>2</sub> NO <sub>4</sub> Pd |
| fw                                                         | 648.90                                               | 572.43                                | 572.43                                | 729.79                                                               |
| temp (K)                                                   | 100(2)                                               | 100(2)                                | 100(2)                                | 100(2)                                                               |
| cryst habit                                                | yellow block                                         | colorless block                       | colorless prism                       | colorless prism                                                      |
| cryst size (mm)                                            | 0.20 x 0.18 x 0.10                                   | 0.38 x 0.26 x 0.17                    | 0.26 x 0.19 x 0.07                    | 0.230 x 0.080 x 0.030                                                |
| cryst syst                                                 | triclinic                                            | monoclinic                            | triclinic                             | monoclinic                                                           |
| space group                                                | <i>P</i> $\bar{1}$                                   | <i>P</i> 2 <sub>1</sub> / <i>c</i>    | <i>P</i> $\bar{1}$                    | <i>P</i> 2 <sub>1</sub> / <i>n</i>                                   |
| <i>a</i> (Å)                                               | 8.9631(8)                                            | 10.2233(9)                            | 10.6754(9)                            | 16.9537(8)                                                           |
| <i>b</i> (Å)                                               | 11.7417(11)                                          | 17.5358(16)                           | 11.0500(11)                           | 8.8151(4)                                                            |
| <i>c</i> (Å)                                               | 14.2801(12)                                          | 15.6984(14)                           | 14.3048(11)                           | 20.9006(9)                                                           |
| $\alpha$ (deg)                                             | 110.003(2)                                           | 90                                    | 70.041(2)                             | 90                                                                   |
| $\beta$ (deg)                                              | 104.351(2)                                           | 106.430(2)                            | 68.606(3)                             | 107.9949(16)                                                         |
| $\gamma$ (deg)                                             | 92.262(2)                                            | 90                                    | 61.474(2)                             | 90                                                                   |
| <i>V</i> (Å <sup>3</sup> )                                 | 1355.3(2)                                            | 2699.4(4)                             | 1351.3(2)                             | 2970.8(2)                                                            |
| <i>Z</i>                                                   | 2                                                    | 4                                     | 2                                     | 4                                                                    |
| $\rho_{\text{calcd}}$ (Mg m <sup>-3</sup> )                | 1.590                                                | 1.409                                 | 1.407                                 | 1.632                                                                |
| $\mu$ (Mo, K $\alpha$ ) (mm <sup>-1</sup> )                | 2.189                                                | 0.807                                 | 0.806                                 | 2.186                                                                |
| <i>F</i> (000)                                             | 656                                                  | 1176                                  | 588                                   | 1472                                                                 |
| $\theta$ range (deg)                                       | 1.86–28.73                                           | 1.78–28.72                            | 1.56–28.72                            | 2.05–28.80                                                           |
| no. rflns collected                                        | 16 682                                               | 32 642                                | 16 608                                | 96 802                                                               |
| no. indep rflns                                            | 6365                                                 | 6573                                  | 6351                                  | 7710                                                                 |
| <i>R</i> <sub>int</sub>                                    | 0.0173                                               | 0.0305                                | 0.0170                                | 0.0705                                                               |
| max, min transmsn                                          | 0.811, 0.674                                         | 0.875, 0.764                          | 0.946, 0.786                          | 0.937, 0.633                                                         |
| no. of restraints/params                                   | 2/347                                                | 1/326                                 | 5/375                                 | 1/355                                                                |
| goodness of fit on <i>F</i> <sup>2</sup>                   | 1.045                                                | 1.101                                 | 1.100                                 | 1.054                                                                |
| <i>R</i> 1 ( <i>I</i> > 2 $\sigma$ ( <i>I</i> ))           | 0.0207                                               | 0.0346                                | 0.0234                                | 0.0370                                                               |
| w <i>R</i> 2 (all rflns)                                   | 0.0536                                               | 0.0758                                | 0.0578                                | 0.0800                                                               |
| largest diff peak, hole (e <sup>-</sup> ·Å <sup>-3</sup> ) | 0.481, -0.579                                        | 0.665, -0.435                         | 0.511, -0.611                         | 1.315, -1.403                                                        |

**Table S2.** Crystal Data and Structure Refinement Details for Complexes *syn-2a*, *anti-2b*·CHCl<sub>3</sub>, *syn-2b*, and *syn-3b*·CH<sub>2</sub>Cl<sub>2</sub>.

|                                                           | <i>syn-2a</i>                                         | <i>anti-2b</i> ·CHCl <sub>3</sub>                                  | <i>syn-2b</i>                                        | <i>syn-3b</i> ·CH <sub>2</sub> Cl <sub>2</sub>                                                   |
|-----------------------------------------------------------|-------------------------------------------------------|--------------------------------------------------------------------|------------------------------------------------------|--------------------------------------------------------------------------------------------------|
| formula                                                   | C <sub>29</sub> H <sub>32</sub> BrNO <sub>4</sub> Pd  | C <sub>30</sub> H <sub>33</sub> Cl <sub>4</sub> NO <sub>2</sub> Pd | C <sub>29</sub> H <sub>32</sub> ClNO <sub>2</sub> Pd | C <sub>41</sub> H <sub>43</sub> Cl <sub>2</sub> F <sub>3</sub> N <sub>2</sub> O <sub>3</sub> PdS |
| fw                                                        | 644.86                                                | 687.77                                                             | 568.40                                               | 878.13                                                                                           |
| temp (K)                                                  | 100(2)                                                | 100(2)                                                             | 100(2)                                               | 100(2)                                                                                           |
| cryst habit                                               | yellow lath                                           | colorless prism                                                    | yellow prism                                         | colorless block                                                                                  |
| cryst size (mm)                                           | 0.21 x 0.16 x 0.016                                   | 0.13 x 0.09 x 0.08                                                 | 0.20 x 0.09 x 0.08                                   | 0.37 x 0.12 x 0.09                                                                               |
| cryst syst                                                | orthorhombic                                          | triclinic                                                          | triclinic                                            | triclinic                                                                                        |
| space group                                               | <i>P</i> 2 <sub>1</sub> 2 <sub>1</sub> 2 <sub>1</sub> | <i>P</i> $\bar{1}$                                                 | <i>P</i> $\bar{1}$                                   | <i>P</i> $\bar{1}$                                                                               |
| <i>a</i> (Å)                                              | 8.9693(5)                                             | 10.6530(8)                                                         | 9.0931(6)                                            | 11.4056(8)                                                                                       |
| <i>b</i> (Å)                                              | 9.1468(5)                                             | 12.4688(9)                                                         | 11.9585(8)                                           | 18.0651(13)                                                                                      |
| <i>c</i> (Å)                                              | 32.5761(18)                                           | 13.3325(11)                                                        | 12.0592(8)                                           | 20.4085(15)                                                                                      |
| $\alpha$ (deg)                                            | 90                                                    | 116.035(2)                                                         | 80.987(2)                                            | 76.531(2)                                                                                        |
| $\beta$ (deg)                                             | 90                                                    | 93.499(3)                                                          | 83.351(3)                                            | 83.006(3)                                                                                        |
| $\gamma$ (deg)                                            | 90                                                    | 103.312(2)                                                         | 85.948(2)                                            | 80.422(2)                                                                                        |
| <i>V</i> (Å <sup>3</sup> )                                | 2672.6(3)                                             | 1521.7(2)                                                          | 1284.57(15)                                          | 4017.2(5)                                                                                        |
| <i>Z</i>                                                  | 4                                                     | 2                                                                  | 2                                                    | 4                                                                                                |
| $\rho_{\text{calcd}}$ (Mg m <sup>-3</sup> )               | 1.603                                                 | 1.501                                                              | 1.470                                                | 1.452                                                                                            |
| $\mu$ (Mo, K $\alpha$ ) (mm <sup>-1</sup> )               | 2.225                                                 | 0.989                                                              | 0.853                                                | 0.701                                                                                            |
| <i>F</i> (000)                                            | 1304                                                  | 700                                                                | 584                                                  | 1800                                                                                             |
| $\theta$ range (deg)                                      | 2.31–28.37                                            | 1.73–28.68                                                         | 1.72–28.59                                           | 1.72–28.74                                                                                       |
| no. rflns collected                                       | 65 022                                                | 18 867                                                             | 15 851                                               | 49 595                                                                                           |
| no. indep rflns                                           | 6654                                                  | 7173                                                               | 6030                                                 | 18 882                                                                                           |
| <i>R</i> <sub>int</sub>                                   | 0.0729                                                | 0.0266                                                             | 0.0211                                               | 0.0260                                                                                           |
| max, min transmsn                                         | 0.862, 0.738                                          | 0.925, 0.815                                                       | 0.935, 0.786                                         | 0.940, 0.850                                                                                     |
| no. of restraints/params                                  | 9/359                                                 | 103/383                                                            | 1/318                                                | 0/993                                                                                            |
| goodness of fit on <i>F</i> <sup>2</sup>                  | 1.032                                                 | 0.937                                                              | 1.091                                                | 1.204                                                                                            |
| <i>R</i> 1 ( <i>I</i> > 2 $\sigma$ ( <i>I</i> ))          | 0.0309                                                | 0.0387                                                             | 0.0286                                               | 0.0418                                                                                           |
| w <i>R</i> 2 (all rflns)                                  | 0.0531                                                | 0.0883                                                             | 0.0666                                               | 0.0880                                                                                           |
| largest diff peak, hole (e <sup>-</sup> Å <sup>-3</sup> ) | 0.496, -0.616                                         | 0.803, -0.785                                                      | 1.061, -0.525                                        | 0.755, -0.628                                                                                    |

**Table S3.** Crystal Data and Structure Refinement Details for Compounds **6b**·H<sub>2</sub>O, **7c**·CHCl<sub>3</sub>, **7d**·1/2CHCl<sub>3</sub>, and **7f**.

|                                                           | <b>6b</b> ·H <sub>2</sub> O                                      | <b>7c</b> ·CHCl <sub>3</sub>                        | <b>7d</b> ·1/2CHCl <sub>3</sub>                                          | <b>7f</b>                                            |
|-----------------------------------------------------------|------------------------------------------------------------------|-----------------------------------------------------|--------------------------------------------------------------------------|------------------------------------------------------|
| formula                                                   | C <sub>33</sub> H <sub>34</sub> F <sub>3</sub> NO <sub>4</sub> S | C <sub>27</sub> H <sub>33</sub> Cl <sub>4</sub> NPd | C <sub>27.5</sub> H <sub>32.5</sub> Cl <sub>2.5</sub> NO <sub>2</sub> Pd | C <sub>23</sub> H <sub>30</sub> ClNO <sub>4</sub> Pd |
| fw                                                        | 597.67                                                           | 619.74                                              | 604.07                                                                   | 526.33                                               |
| temp (K)                                                  | 100(2)                                                           | 100(2)                                              | 100(2)                                                                   | 100(2)                                               |
| cryst habit                                               | pale yellow prism                                                | colorless prism                                     | colorless prism                                                          | yellow prism                                         |
| cryst size (mm)                                           | 0.24 x 0.16 x 0.06                                               | 0.25 x 0.11 x 0.05                                  | 0.16 x 0.10 x 0.02                                                       | 0.25 x 0.07 x 0.07                                   |
| cryst syst                                                | monoclinic                                                       | monoclinic                                          | monoclinic                                                               | monoclinic                                           |
| space group                                               | <i>P2<sub>1</sub>/c</i>                                          | <i>P2<sub>1</sub>/n</i>                             | <i>C2/c</i>                                                              | <i>P2<sub>1</sub>/n</i>                              |
| <i>a</i> (Å)                                              | 22.3424(17)                                                      | 11.4685(9)                                          | 23.7231(19)                                                              | 12.0005(11)                                          |
| <i>b</i> (Å)                                              | 10.7595(8)                                                       | 10.8204(9)                                          | 14.2275(12)                                                              | 13.1557(13)                                          |
| <i>c</i> (Å)                                              | 12.6718(11)                                                      | 21.5690(17)                                         | 17.3927(14)                                                              | 14.2244(14)                                          |
| $\alpha$ (deg)                                            | 90                                                               | 90                                                  | 90                                                                       | 90                                                   |
| $\beta$ (deg)                                             | 91.435(2)                                                        | 99.6340(10)                                         | 118.388(2)                                                               | 105.146(2)                                           |
| $\gamma$ (deg)                                            | 90                                                               | 90                                                  | 90                                                                       | 90                                                   |
| <i>V</i> (Å <sup>3</sup> )                                | 3045.3(4)                                                        | 2638.8(4)                                           | 5164.5(7)                                                                | 2167.7(4)                                            |
| <i>Z</i>                                                  | 4                                                                | 4                                                   | 8                                                                        | 4                                                    |
| $\rho_{\text{calcd}}$ (Mg m <sup>-3</sup> )               | 1.304                                                            | 1.560                                               | 1.554                                                                    | 1.613                                                |
| $\mu$ (Mo, K $\alpha$ ) (mm <sup>-1</sup> )               | 0.162                                                            | 1.125                                               | 1.003                                                                    | 1.010                                                |
| <i>F</i> (000)                                            | 1256                                                             | 1264                                                | 2472                                                                     | 1080                                                 |
| $\theta$ range (deg)                                      | 1.82–28.76                                                       | 1.89–28.70                                          | 1.73–27.88                                                               | 1.98–28.67                                           |
| no. rflns collected                                       | 36 514                                                           | 31 637                                              | 30 962                                                                   | 26 555                                               |
| no. indep rflns                                           | 7451                                                             | 6410                                                | 6116                                                                     | 5278                                                 |
| <i>R</i> <sub>int</sub>                                   | 0.0347                                                           | 0.0293                                              | 0.0478                                                                   | 0.0306                                               |
| max, min transmsn                                         | 0.990, 0.904                                                     | 0.946, 0.837                                        | 0.980, 0.847                                                             | 0.933, 0.831                                         |
| no. of restraints/params                                  | 2/401                                                            | 0/309                                               | 316/333                                                                  | 1/283                                                |
| goodness of fit on <i>F</i> <sup>2</sup>                  | 1.187                                                            | 1.135                                               | 1.107                                                                    | 1.061                                                |
| <i>R</i> 1 ( <i>I</i> > 2 $\sigma$ ( <i>I</i> ))          | 0.0627                                                           | 0.0319                                              | 0.0435                                                                   | 0.0263                                               |
| w <i>R</i> 2 (all rflns)                                  | 0.1380                                                           | 0.0692                                              | 0.0939                                                                   | 0.0614                                               |
| largest diff peak, hole (e <sup>-</sup> Å <sup>-3</sup> ) | 0.627, -0.321                                                    | 0.750, -0.507                                       | 1.144, -0.860                                                            | 0.659, -0.322                                        |

**Table S4.** Crystal Data and Structure Refinement Details for Compounds **8f**, **9d**, **9f**·Et<sub>2</sub>O, and **10c**·H<sub>2</sub>O.

|                                                            | <b>8f</b>                                                        | <b>9d</b>                                                        | <b>9f</b> ·Et <sub>2</sub> O                                      | <b>10c</b> ·H <sub>2</sub> O                                     |
|------------------------------------------------------------|------------------------------------------------------------------|------------------------------------------------------------------|-------------------------------------------------------------------|------------------------------------------------------------------|
| formula                                                    | C <sub>24</sub> H <sub>30</sub> F <sub>3</sub> NO <sub>7</sub> S | C <sub>29</sub> H <sub>34</sub> F <sub>3</sub> NO <sub>7</sub> S | C <sub>29</sub> H <sub>42</sub> F <sub>3</sub> NO <sub>10</sub> S | C <sub>28</sub> H <sub>36</sub> F <sub>3</sub> NO <sub>6</sub> S |
| fw                                                         | 533.55                                                           | 597.63                                                           | 653.69                                                            | 571.64                                                           |
| temp (K)                                                   | 100(2)                                                           | 100(2)                                                           | 100(2)                                                            | 100(2)                                                           |
| cryst habit                                                | colorless prism                                                  | colorless needle                                                 | colorless lath                                                    | colorless prism                                                  |
| cryst size (mm)                                            | 0.23 x 0.14 x 0.11                                               | 0.13 x 0.03 x 0.03                                               | 0.20 x 0.15 x 0.03                                                | 0.09 x 0.07 x 0.014                                              |
| cryst syst                                                 | triclinic                                                        | orthorhombic                                                     | monoclinic                                                        | triclinic                                                        |
| space group                                                | <i>P</i> $\bar{1}$                                               | <i>Pbca</i>                                                      | <i>P2</i> <sub>1</sub> / <i>n</i>                                 | <i>P</i> $\bar{1}$                                               |
| <i>a</i> (Å)                                               | 9.4903(7)                                                        | 18.0389(9)                                                       | 8.7895(6)                                                         | 8.9366(8)                                                        |
| <i>b</i> (Å)                                               | 9.9546(7)                                                        | 15.3736(6)                                                       | 25.4271(17)                                                       | 12.0889(11)                                                      |
| <i>c</i> (Å)                                               | 13.3238(13)                                                      | 19.6769(9)                                                       | 13.8814(9)                                                        | 13.8916(12)                                                      |
| $\alpha$ (deg)                                             | 105.493(2)                                                       | 90                                                               | 90                                                                | 83.450(3) <sup>°</sup>                                           |
| $\beta$ (deg)                                              | 92.836(3)                                                        | 90                                                               | 96.550(2)                                                         | 88.543(3) <sup>°</sup>                                           |
| $\gamma$ (deg)                                             | 96.262(2)                                                        | 90                                                               | 90                                                                | 68.801(3) <sup>°</sup>                                           |
| <i>V</i> (Å <sup>3</sup> )                                 | 1201.68(17)                                                      | 5456.9(4)                                                        | 3082.1(4)                                                         | 1389.9(2)                                                        |
| <i>Z</i>                                                   | 2                                                                | 8                                                                | 4                                                                 | 2                                                                |
| $\rho_{\text{calcd}}$ (Mg m <sup>-3</sup> )                | 1.475                                                            | 1.455                                                            | 1.409                                                             | 1.366                                                            |
| $\mu$ (Mo, K $\alpha$ ) (mm <sup>-1</sup> )                | 0.204                                                            | 0.189                                                            | 0.181                                                             | 0.179                                                            |
| <i>F</i> (000)                                             | 560                                                              | 2512                                                             | 1384                                                              | 604                                                              |
| $\theta$ range (deg)                                       | 2.14–28.67                                                       | 2.02–26.41                                                       | 2.18–28.79                                                        | 2.21–26.44                                                       |
| no. rflns collected                                        | 14 821                                                           | 58 213                                                           | 63 048                                                            | 36 550                                                           |
| no. indep rflns                                            | 5647                                                             | 5590                                                             | 7999                                                              | 5717                                                             |
| <i>R</i> <sub>int</sub>                                    | 0.0184                                                           | 0.1128                                                           | 0.0584                                                            | 0.0546                                                           |
| max, min transmsn                                          | 0.978, 0.849                                                     | 0.862, 0.806                                                     | 0.862, 0.799                                                      | 0.862, 0.821                                                     |
| no. of restraints/params                                   | 1/337                                                            | 3/385                                                            | 0/415                                                             | 6/376                                                            |
| goodness of fit on <i>F</i> <sup>2</sup>                   | 1.078                                                            | 1.068                                                            | 1.058                                                             | 1.025                                                            |
| <i>R</i> 1 ( <i>I</i> > 2 $\sigma$ ( <i>I</i> ))           | 0.0404                                                           | 0.0496                                                           | 0.0456                                                            | 0.0437                                                           |
| w <i>R</i> 2 (all rflns)                                   | 0.1012                                                           | 0.1115                                                           | 0.1034                                                            | 0.1073                                                           |
| largest diff peak, hole (e <sup>-</sup> ·Å <sup>-3</sup> ) | 0.422, -0.430                                                    | 0.745, -0.505                                                    | 0.431, -0.399                                                     | 0.517, -0.418                                                    |



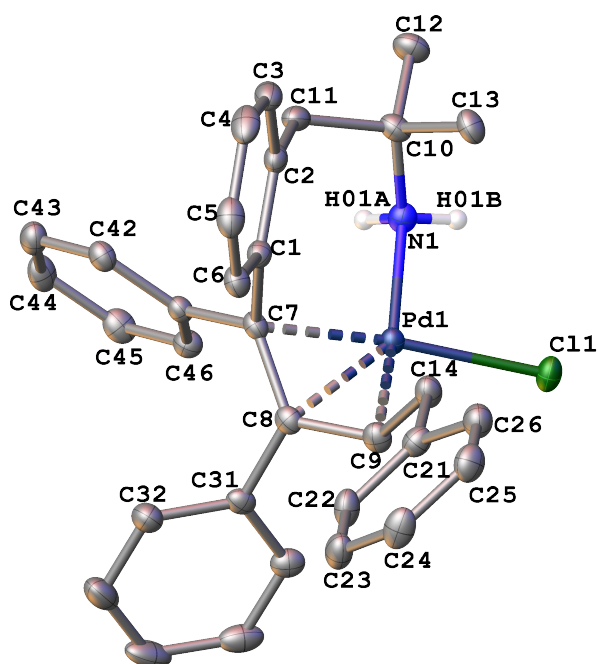

**Figure S1.** Thermal ellipsoid plot (50 % probability) of *anti-1b* along with the labeling scheme. The hydrogen atoms bonded to carbon have been omitted for clarity. Selected bond lengths (Å) and angles (deg): Pd(1)–Cl(1) = 2.3644(6), Pd(1)–N(1) = 2.1086(19), Pd(1)–C(7) = 2.118(2), Pd(1)–C(8) = 2.119(2), Pd(1)–C(9) = 2.114(2), C(7)–C(8) = 1.452(3), C(8)–C(9) = 1.430(3); Cl(1)–Pd(1)–N(1) = 88.46(6), C(7)–C(8)–C(9) = 121.24(19), C(8)–C(9)–C(14) = 132.3(2).

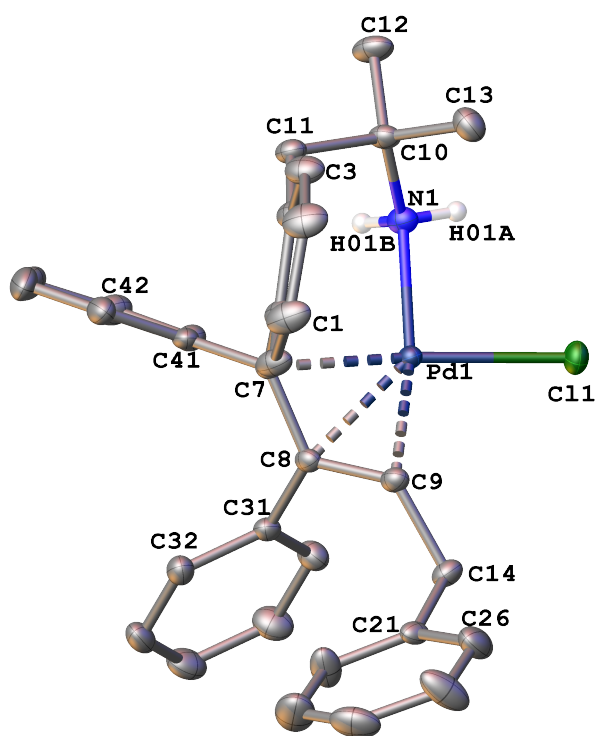

**Figure S2.** Thermal ellipsoid plot (50 % probability) of *syn-1b* along with the labeling scheme. The hydrogen atoms bonded to carbon have been omitted for clarity. Selected bond lengths (Å) and angles (deg): Pd(1)–Cl(1) = 2.3670(5), Pd(1)–N(1) = 2.1231(14), Pd(1)–C(7) = 2.1306(15), Pd(1)–C(8) = 2.1232(15), Pd(1)–C(9) = 2.1290(15), C(7)–C(8) = 1.445(2), C(8)–C(9) = 1.419(2); Cl(1)–Pd(1)–N(1) = 89.70(4), C(7)–C(8)–C(9) = 117.90(14), C(8)–C(9)–C(14) = 124.64(14).

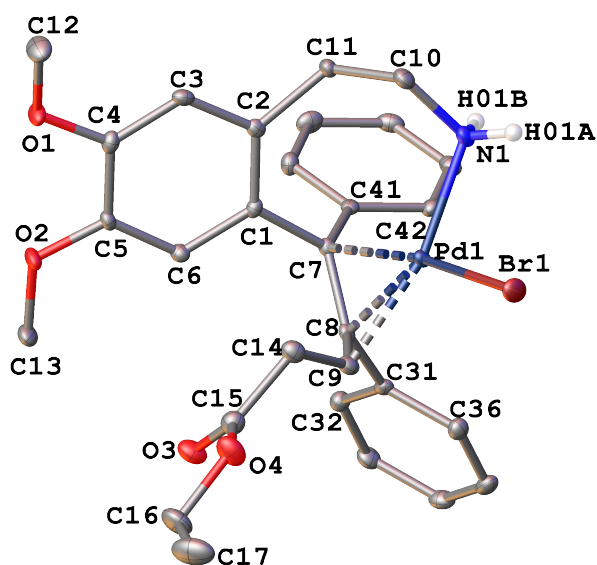

**Figure S3.** Thermal ellipsoid plot (50 % probability) of *anti-2a*·CH<sub>2</sub>Cl<sub>2</sub> along with the labeling scheme. The solvent molecule and the hydrogen atoms bonded to carbon have been omitted for clarity. Selected bond lengths (Å) and angles (deg): Pd(1)–Br(1) = 2.4850(3), Pd(1)–N(1) = 2.105(2), Pd(1)–C(7) = 2.132(2), Pd(1)–C(8) = 2.108(3), Pd(1)–C(9) = 2.101(3), C(7)–C(8) = 1.447(4), C(8)–C(9) = 1.430(4); Br(1)–Pd(1)–N(1) = 91.03(6), C(7)–C(8)–C(9) = 120.4(2), C(8)–C(9)–C(14) = 132.1(3).

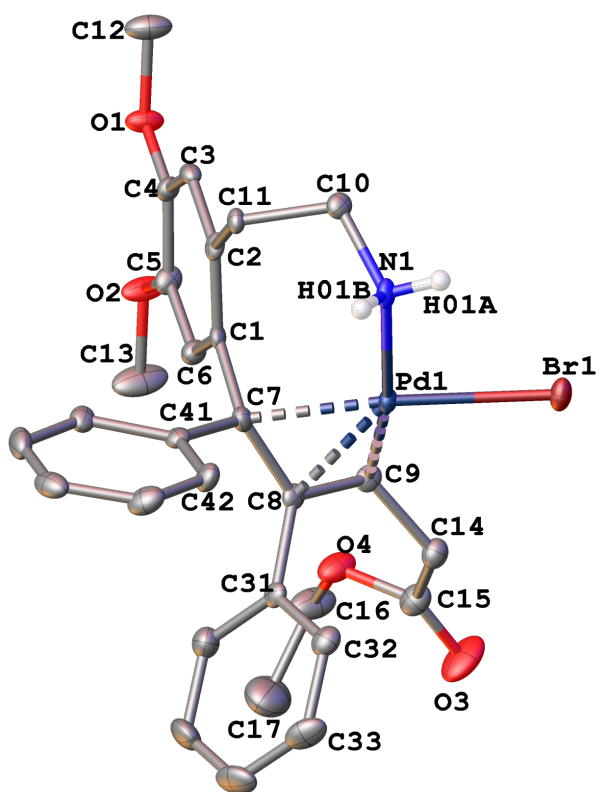

**Figure S4.** Thermal ellipsoid plot (50 % probability) of *syn-2a* along with the labeling scheme. The hydrogen atoms bonded to carbon have been omitted for clarity. Selected bond lengths (Å) and angles (deg): Pd(1)–Br(1) = 2.4878(5), Pd(1)–N(1) = 2.126(3), Pd(1)–C(7) = 2.132(4), Pd(1)–C(8) = 2.125(4), Pd(1)–C(9) = 2.115(3), C(7)–C(8) = 1.435(5), C(8)–C(9) = 1.418(5); Br(1)–Pd(1)–N(1) = 90.86(9), C(7)–C(8)–C(9) = 118.5(3), C(8)–C(9)–C(14) = 122.5(4).

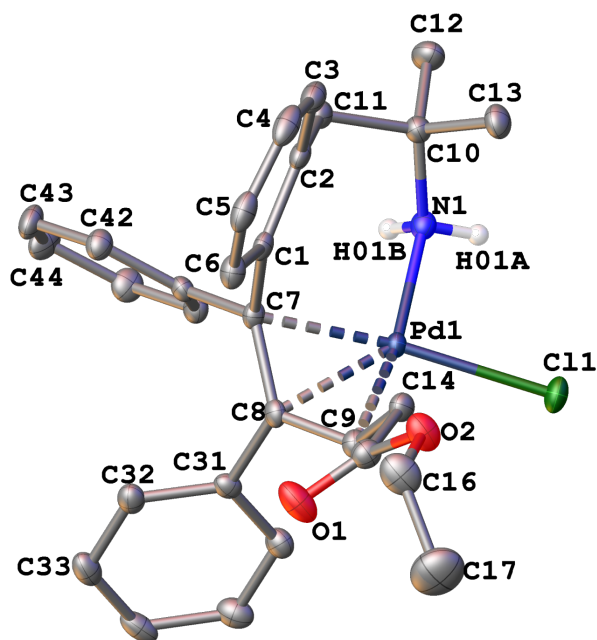

**Figure S5.** Thermal ellipsoid plot (50 % probability) of *anti*-**2b**·CHCl<sub>3</sub> along with the labeling scheme. The solvent molecule and the hydrogen atoms bonded to carbon have been omitted for clarity. Selected bond lengths (Å) and angles (deg): Pd(1)–Cl(1) = 2.3861(7), Pd(1)–N(1) = 2.119(2), Pd(1)–C(7) = 2.138(3), Pd(1)–C(8) = 2.114(3), Pd(1)–C(9) = 2.123(3), C(7)–C(8) = 1.439(4), C(8)–C(9) = 1.425(4); Cl(1)–Pd(1)–N(1) = 91.82(7), C(7)–C(8)–C(9) = 122.1(2), C(8)–C(9)–C(14) = 132.5(2).



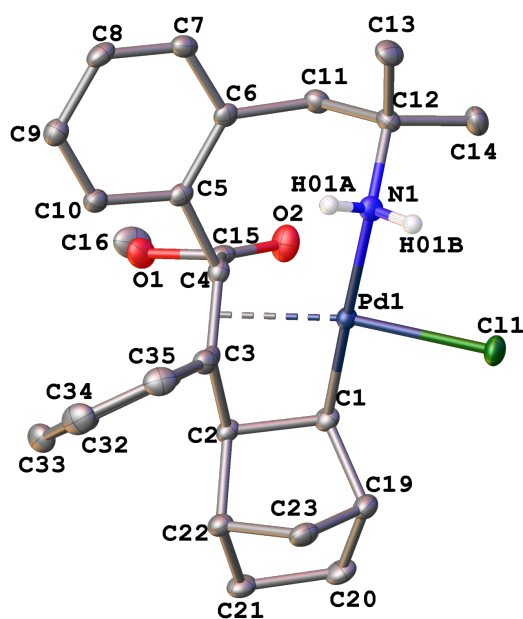

**Figure S7.** Thermal ellipsoid plot (50 % probability) of **7d**·1/2CH<sub>2</sub>Cl<sub>2</sub> along with the labeling scheme. The solvent molecule and the hydrogen atoms bonded to carbon have been omitted for clarity. Selected bond lengths (Å) and angles (deg): Pd(1)–N(1) = 2.219(3), Pd(1)–Cl(1) = 2.3439(8), Pd(1)–C(1) = 2.041(3), Pd(1)–C(3) = 2.177(3), Pd(1)–C(4) = 2.170(3), Pd(1)–X = 2.058, C(1)–C(2) = 1.544(4), C(2)–C(3) = 1.534(4), C(3)–C(4) = 1.400(4), C(4)–C(5) = 1.511(4); N(1)–Pd(1)–Cl(1) = 86.31(7), Cl(1)–Pd(1)–C(1) = 92.68(9), C(1)–Pd(1)–X = 76.7, X–Pd(1)–N(1) = 104.3, C(2)–C(3)–C(4) = 118.3(3), C(3)–C(4)–C(5) = 123.3(3). X represents the midpoint of the double bond C(3)–C(4).

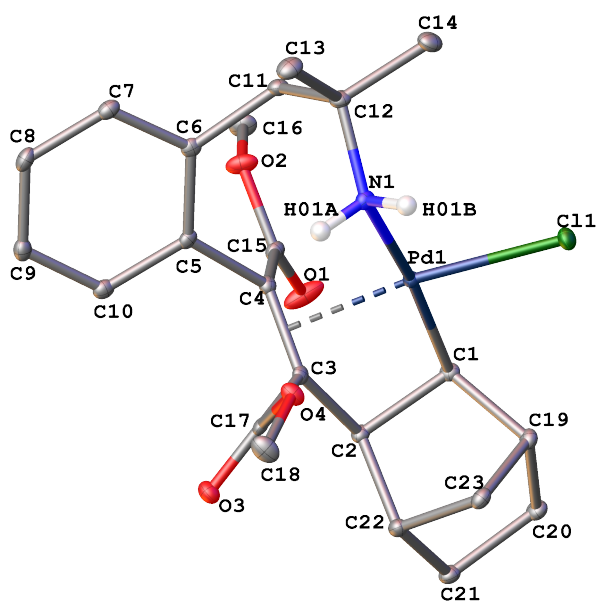

**Figure S8.** Thermal ellipsoid plot (30 % probability) of **7f** along with the labeling scheme. The hydrogen atoms bonded to carbon have been omitted for clarity. Selected bond lengths (Å) and angles (deg): Pd(1)–N(1) = 2.2240(16), Pd(1)–Cl(1) = 2.3363(5), Pd(1)–C(1) = 2.0583(18), Pd(1)–C(3) = 2.1355(18), Pd(1)–C(4) = 2.2042(18), Pd(1)–X = 2.053, C(1)–C(2) = 1.547(3), C(2)–C(3) = 1.534(2), C(3)–C(4) = 1.405(3), C(4)–C(5) = 1.515(3); N(1)–Pd(1)–Cl(1) = 89.49(5), Cl(1)–Pd(1)–C(1) = 92.99(5), C(1)–Pd(1)–X = 77.6, X–Pd(1)–N(1) = 99.7, C(2)–C(3)–C(4) = 121.82(16), C(3)–C(4)–C(5) = 121.20(17). X represents the midpoint of the double bond C(3)–C(4).



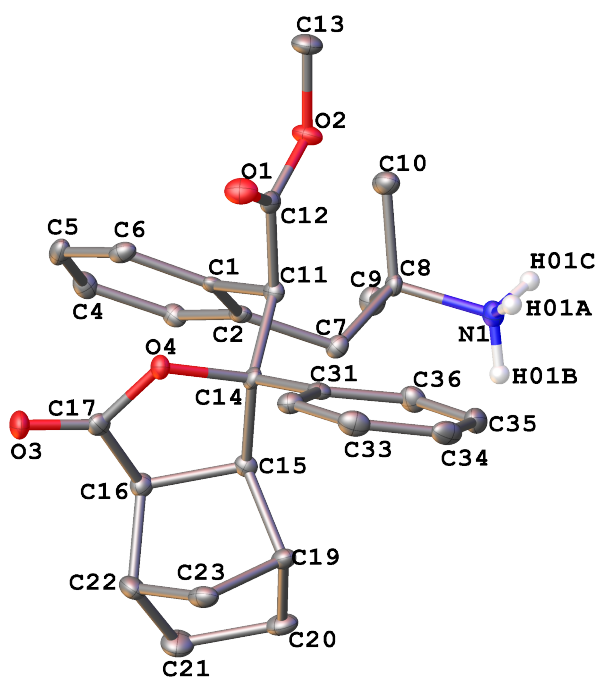

**Figure S9.** Thermal ellipsoid plot (50 % probability) of the cation of **9d** along with the labeling scheme. The hydrogen atoms bonded to carbon have been omitted for clarity. Selected bond lengths (Å) and angles (deg): N(1)–C(8) = 1.517(3), C(11)–C(12) = 1.523(3), C(11)–C(14) = 1.554(3), C(14)–O(4) = 1.461(3), C(17)–O(3) = 1.213(3), C(17)–O(4) = 1.338(3), C(16)–C(17) = 1.505(3); C(1)–C(11)–C(12) = 110.01(19), C(11)–C(14)–O(4) = 108.07(18), C(14)–O(4)–C(17) = 112.77(17), O(4)–C(17)–C(16) = 111.8(2), C(17)–C(16)–C(15) = 104.35(19), C(16)–C(15)–C(14) = 104.38(18), C(15)–C(14)–O(4) = 105.06(17).

**Table S5.** Hydrogen bonds for complex *anti-1b* (Å and deg).

| D–H···A               | d(D–H)  | d(H···A) | d(D···A) | <(DHA) |
|-----------------------|---------|----------|----------|--------|
| N(1)–H(01A)···Cl(1)#1 | 0.85(2) | 2.57(2)  | 3.339(2) | 151(3) |

Symmetry transformations used to generate equivalent atoms: #1 -x+1,-y+2,-z+1

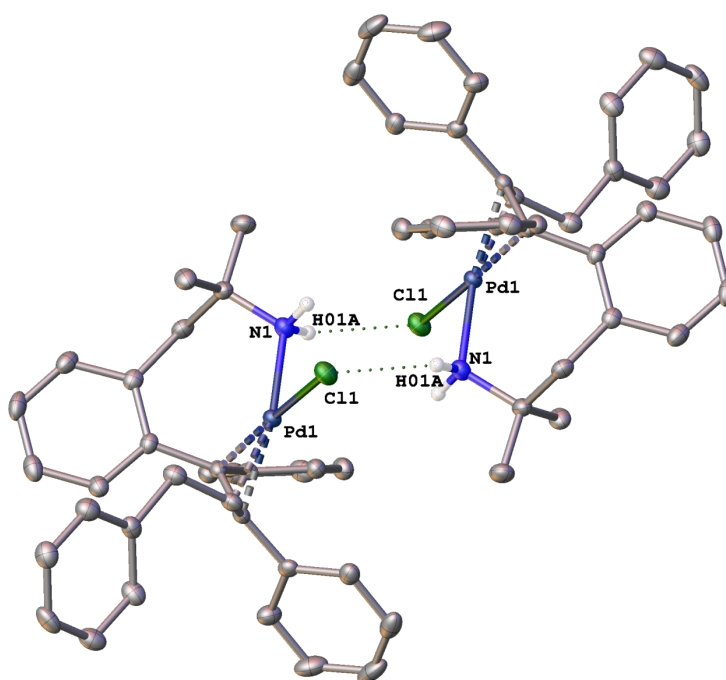

**Figure S10.** Thermal ellipsoid plot (50 % probability) of complex *anti-1b* showing the dimers formed through hydrogen bonds.

**Table S6.** Hydrogen bonds for complex *syn-1b* (Å and deg).

| D–H···A               | d(D–H)    | d(H···A) | d(D···A)   | <(DHA)    |
|-----------------------|-----------|----------|------------|-----------|
| N(1)–H(01B)···Cl(1)#1 | 0.845(17) | 2.71(2)  | 3.3336(15) | 131.3(18) |

Symmetry transformations used to generate equivalent atoms: #1 -x,-y+2,-z+1

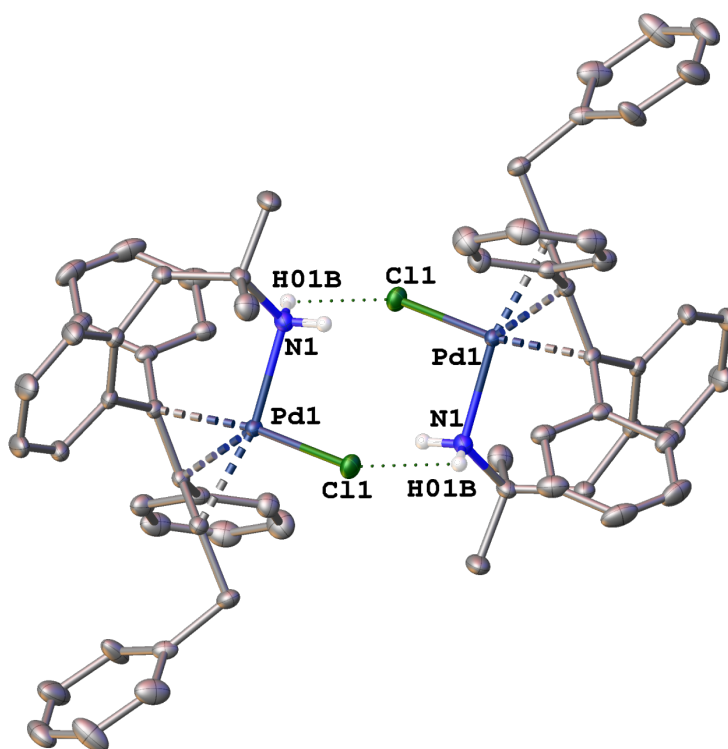

**Figure S11.** Thermal ellipsoid plot (50 % probability) of complex *syn-1b* showing the dimers formed through hydrogen bonds.

**Table S7.** Hydrogen bonds for complex *anti-2a*·CH<sub>2</sub>Cl<sub>2</sub> (Å and deg).

| D–H...A                | d(D–H) | d(H...A) | d(D...A) | <(DHA) |
|------------------------|--------|----------|----------|--------|
| C(99)–H(99B)···Br(1)#1 | 0.99   | 2.79     | 3.725(4) | 157.6  |
| C(99)–H(99A)···O(4)#1  | 0.99   | 2.53     | 3.343(4) | 139.4  |
| C(3)–H(3)···O(3)#2     | 0.95   | 2.44     | 3.344(3) | 160.0  |
| N(1)–H(01A)···Br(1)#1  | 0.91   | 2.72     | 3.472(2) | 140.2  |

Symmetry transformations used to generate equivalent atoms:

#1  $-x+3/2, y+1/2, -z+1/2$  #2  $x, y+1, z$

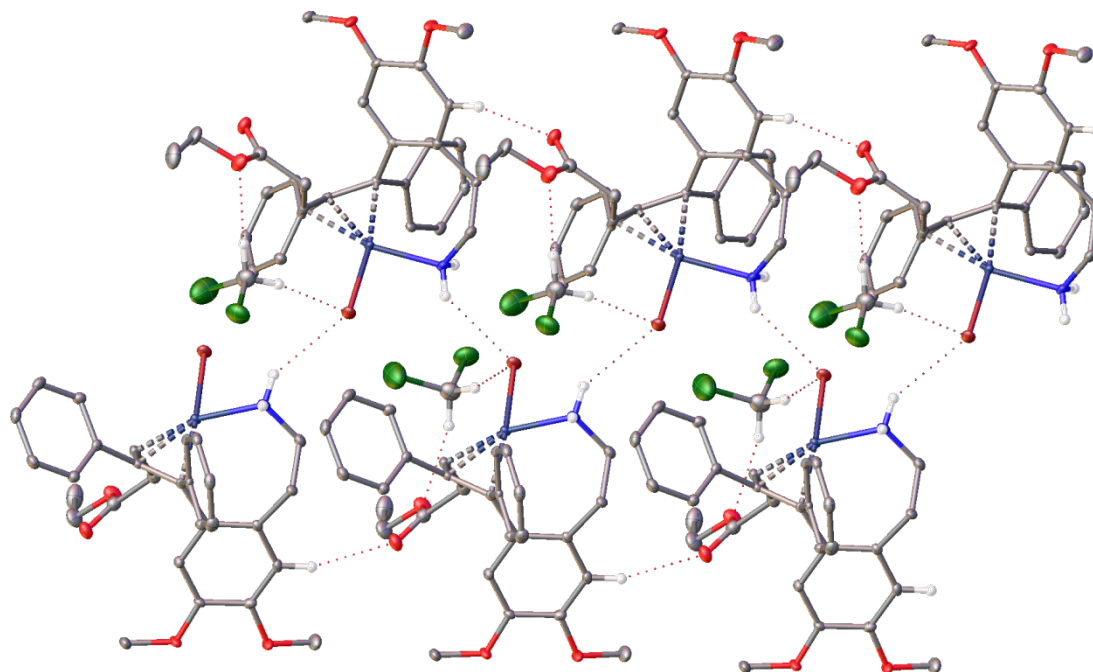

**Figure S12.** X-ray packing view (50 % probability) of *anti-2a*·CH<sub>2</sub>Cl<sub>2</sub> showing the double chains parallel to the *b* axis formed through hydrogen bonds.

**Table S8.** Hydrogen bonds for complex *syn-2a* (Å and deg).

| D–H⋯A               | d(D–H)  | d(H⋯A)  | d(D⋯A)   | <(DHA) |
|---------------------|---------|---------|----------|--------|
| N(1)–H(01A)⋯Br(1)   | 0.82(3) | 2.93(4) | 3.297(3) | 110(3) |
| N(1)–H(01B)⋯Br(1)#1 | 0.81(3) | 2.71(3) | 3.481(4) | 160(4) |

Symmetry transformations used to generate equivalent atoms: #1  $x-1/2, -y+3/2, -z+2$

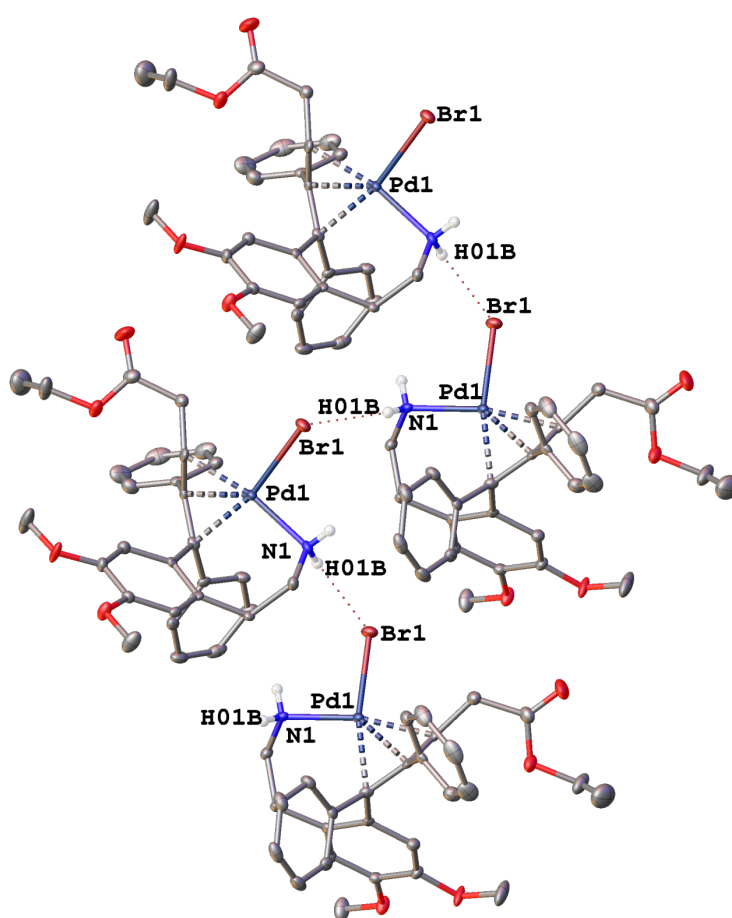

**Figure S13.** X-ray packing view (50 % probability) of *syn-2a* showing the *zigzag* chains parallel to the *a* axis formed through hydrogen bonds.



**Table S10.** Hydrogen bonds for complex *syn-2b* (Å and deg).

| D–H...A               | d(D–H)    | d(H...A) | d(D...A)   | <(DHA) |
|-----------------------|-----------|----------|------------|--------|
| N(1)–H(01A)···Cl(1)#1 | 0.844(19) | 2.61(2)  | 3.3340(19) | 145(2) |
| C(42)–H(42)···O(2)#2  | 0.95      | 2.57     | 3.462(3)   | 155.9  |

Symmetry transformations used to generate equivalent atoms: #1  $-x+2, -y, -z+1$  #2  $x-1, y, z$

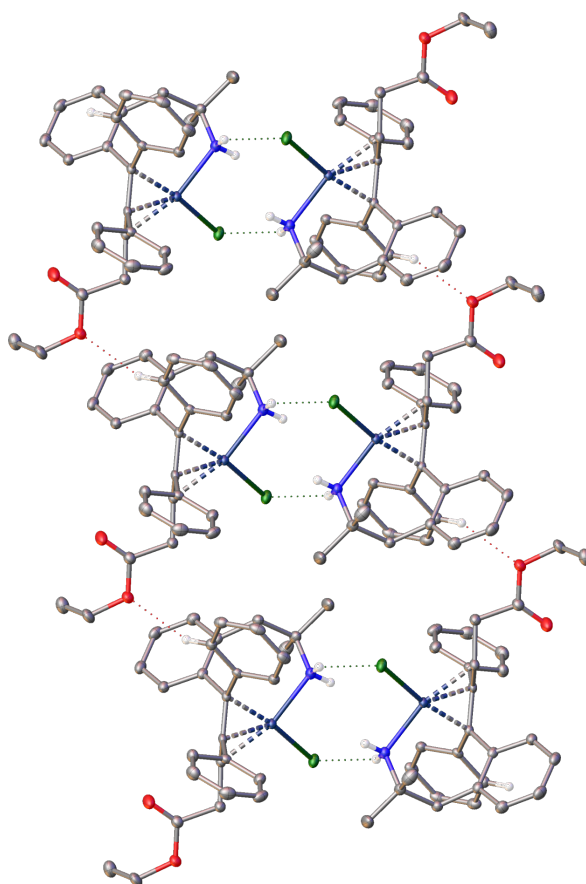

**Figure S15.** X-ray packing view (50 % probability) of *syn-2b* showing the double chains parallel to the *a* axis formed through hydrogen bonds.

**Table S11.** Hydrogen bonds for complex *syn-3b*·CH<sub>2</sub>Cl<sub>2</sub> (Å and deg).

| D–H···A               | d(D–H)  | d(H···A) | d(D···A) | <(DHA) |
|-----------------------|---------|----------|----------|--------|
| N(1)–H(01A)···O(2)    | 0.86(3) | 2.30(3)  | 3.143(3) | 170(3) |
| N(2)–H(02A)···O(1)    | 0.89(3) | 2.09(4)  | 2.925(3) | 155(3) |
| N(1')–H(01D)···O(6)#1 | 0.81(3) | 2.35(3)  | 3.153(3) | 172(3) |
| N(2')–H(02C)···O(5)#1 | 0.86(3) | 2.16(3)  | 2.942(3) | 153(3) |
| N(2')–H(02D)···O(6)#2 | 0.80(3) | 2.42(3)  | 3.200(3) | 165(3) |

Symmetry transformations used to generate equivalent atoms: #1 -x+1,-y,-z #2 x+1,y,z

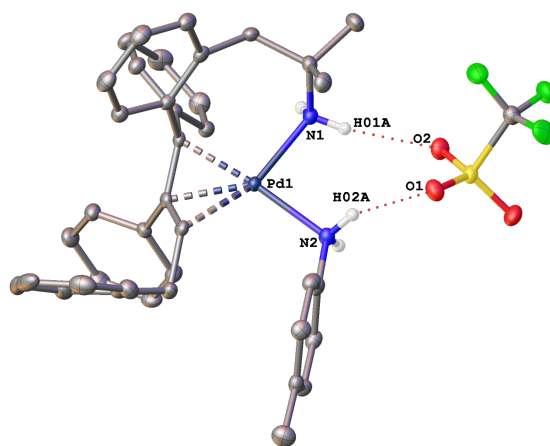

**Figure S16.** Thermal ellipsoid plot (50 % probability) of *syn-3b*·CH<sub>2</sub>Cl<sub>2</sub> (molecule A) showing the hydrogen bonds between the cation and the triflate group.

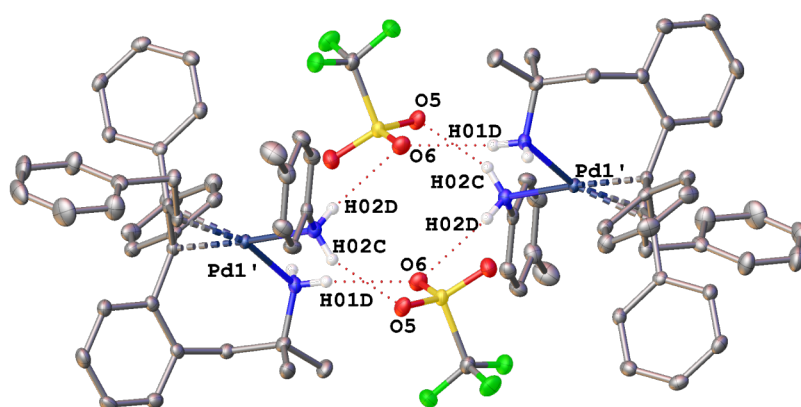

**Figure S17.** Thermal ellipsoid plot (50 % probability) of *3b*·CH<sub>2</sub>Cl<sub>2</sub> (molecule A') showing the dimers formed through hydrogen bonds.



**Table S12.** Hydrogen bonds for compound **6b**·H<sub>2</sub>O (Å and deg).

| D–H···A              | d(D–H)    | d(H···A) | d(D···A) | <(DHA) |
|----------------------|-----------|----------|----------|--------|
| O(4)–H(04A)···O(3)#1 | 0.87(2)   | 1.89(2)  | 2.760(2) | 177(2) |
| N(1)–H(01B)···O(4)#2 | 0.907(19) | 1.85(2)  | 2.753(2) | 171(2) |
| N(1)–H(01A)···O(1)#3 | 0.905(19) | 1.95(2)  | 2.854(2) | 176(2) |
| O(4)–H(04B)···O(1)   | 0.86(2)   | 1.99(2)  | 2.788(2) | 154(3) |
| N(1)–H(01C)···O(2)   | 0.93(3)   | 1.94(3)  | 2.855(2) | 164(2) |

Symmetry transformations used to generate equivalent atoms:

#1  $-x, y+1/2, -z+1/2$  #2  $x, -y+3/2, z-1/2$  #3  $-x, y-1/2, -z+1/2$

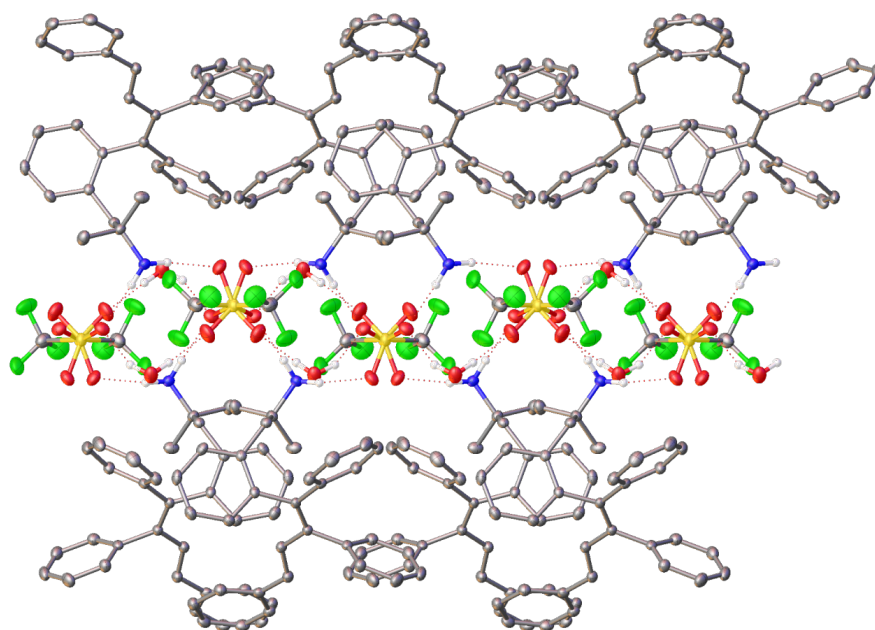

**Figure S18.** X-ray packing view (50 % probability) of **6b**·H<sub>2</sub>O showing the double chains parallel to the *b* axis formed through hydrogen bonds.

**Table S13.** Hydrogen bonds for compound **7c**·CHCl<sub>3</sub> (Å and deg).

| D–H···A               | d(D–H) | d(H···A) | d(D···A) | <(DHA) |
|-----------------------|--------|----------|----------|--------|
| C(99)–H(99)···Cl(1)#1 | 1.00   | 2.43     | 3.409(2) | 167.4  |

Symmetry transformations used to generate equivalent atoms: #1  $x+1/2, -y+1/2, z-1/2$

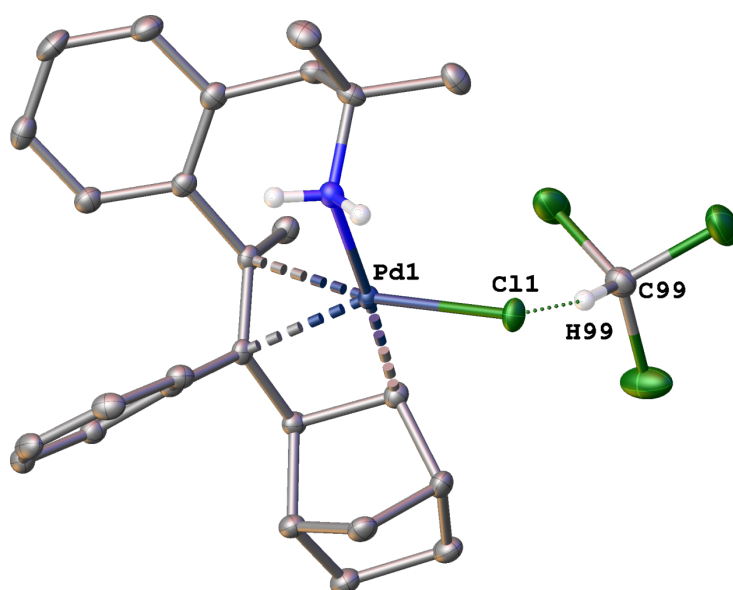

**Figure S19.** Thermal ellipsoid plot (50 % probability) of **7c**·CHCl<sub>3</sub> showing the hydrogen bond between complex **7c** and the crystallization solvent.

**Table S14.** Hydrogen bonds for compound **7d**·1/2CHCl<sub>3</sub> (Å and deg).

| D–H···A             | d(D–H) | d(H···A) | d(D···A) | <(DHA) |
|---------------------|--------|----------|----------|--------|
| C(11)–H(11B)···O(2) | 0.99   | 2.46     | 3.391(4) | 156.7  |

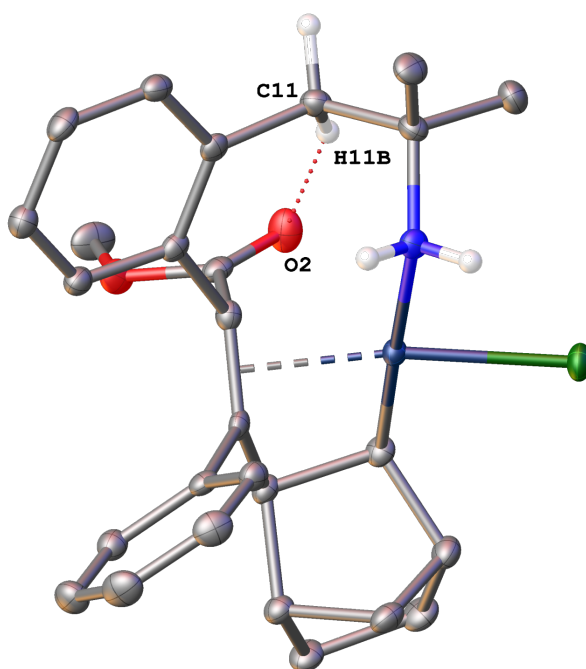

**Figure S20.** Thermal ellipsoid plot (50 % probability) of **7d**·1/2CHCl<sub>3</sub> showing the intramolecular hydrogen bond.

**Table S15.** Hydrogen bonds for compound **7f** (Å and deg).

| D–H···A               | d(D–H)    | d(H···A) | d(D···A)   | <(DHA)    |
|-----------------------|-----------|----------|------------|-----------|
| N(1)–H(01A)···O(4)    | 0.827(18) | 2.36(2)  | 2.956(2)   | 129(2)    |
| N(1)–H(01B)···Cl(1)#1 | 0.833(17) | 2.80(2)  | 3.4396(18) | 134.7(18) |
| C(11)–H(11A)···O(3)#2 | 0.99      | 2.59     | 3.495(2)   | 151.4     |
| C(16)–H(16C)···O(3)#3 | 0.98      | 2.59     | 3.401(3)   | 140.3     |

Symmetry transformations used to generate equivalent atoms:

#1  $-x+2, -y+2, -z$  #2  $-x+3/2, y-1/2, -z+1/2$  #3  $-x+2, -y+2, -z+1$

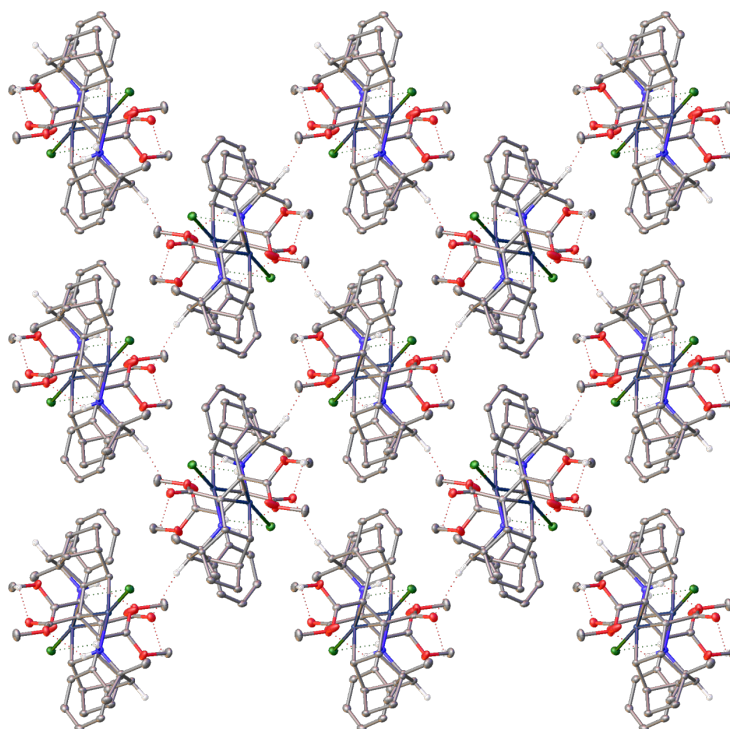

**Figure S21.** X-ray packing view (30 % probability) of **7f** showing the three-dimensional net, formed through hydrogen bonds, viewed down the crystallographic *c* axis.

**Table S16.** Hydrogen bonds for compound **8f** (Å and deg).

| D–H⋯A               | d(D–H)    | d(H⋯A)    | d(D⋯A)     | <(DHA)    |
|---------------------|-----------|-----------|------------|-----------|
| N(1)–H(01A)⋯O(2)    | 0.908(15) | 2.005(16) | 2.7930(16) | 144.3(15) |
| N(1)–H(01B)⋯O(6)#1  | 0.897(16) | 2.007(17) | 2.7834(15) | 144.0(17) |
| C(12)–H(12A)⋯O(6)#2 | 0.98      | 2.53      | 3.4215(19) | 151.8     |
| C(23)–H(23B)⋯O(5)#3 | 0.98      | 2.60      | 3.4925(18) | 151.8     |
| C(6)–H(6)⋯O(7)      | 0.95      | 2.56      | 3.4679(17) | 159.3     |
| C(21)–H(21B)⋯O(5)   | 0.98      | 2.46      | 3.2902(18) | 141.8     |

Symmetry transformations used to generate equivalent atoms:

#1  $x, y-1, z$  #2  $-x, -y+1, -z$  #3  $-x, -y+1, -z+1$

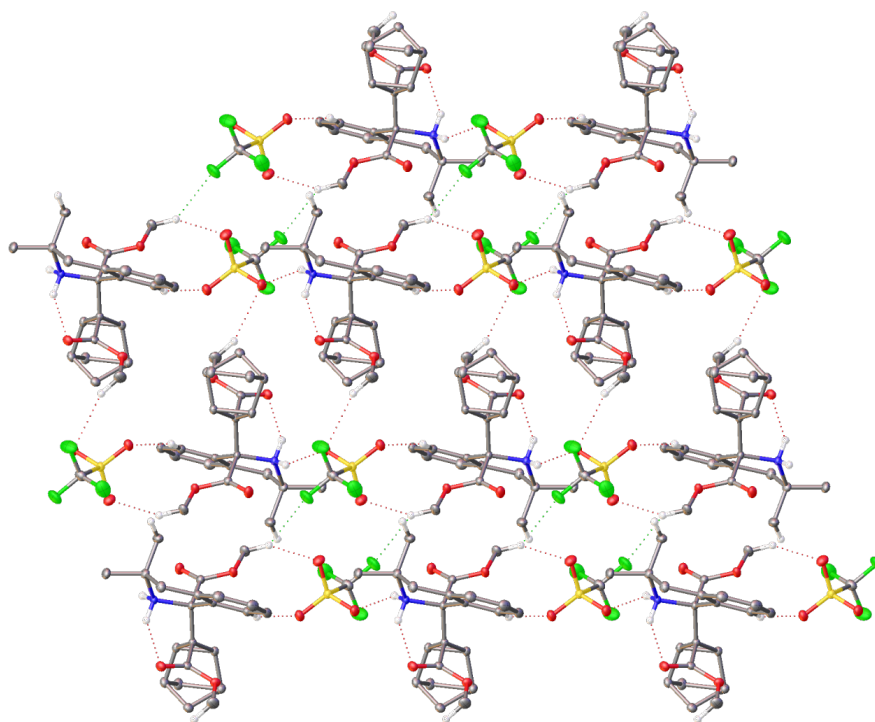

**Figure S22.** X-ray packing view (50 % probability) of **8f** showing the three-dimensional net, formed through hydrogen bonds, viewed down the crystallographic  $a$  axis.

**Table S17.** Hydrogen bonds for compound **9d** (Å and deg).

| D–H···A               | d(D–H)    | d(H···A)  | d(D···A) | <(DHA) |
|-----------------------|-----------|-----------|----------|--------|
| N(1)–H(01A)···O(3)#1  | 0.893(18) | 2.09(2)   | 2.921(3) | 154(3) |
| N(1)–H(01B)···O(1)#2  | 0.891(19) | 2.28(2)   | 3.085(3) | 150(3) |
| N(1)–H(01C)···O(6)#3  | 0.892(19) | 1.913(19) | 2.797(3) | 171(3) |
| C(9)–H(9A)···F(3)#4   | 0.98      | 2.43      | 3.354(3) | 158.0  |
| C(9)–H(9B)···O(1)#2   | 0.98      | 2.57      | 3.384(3) | 140.5  |
| C(10)–H(10A)···O(3)#1 | 0.98      | 2.43      | 3.209(3) | 136.6  |

Symmetry transformations used to generate equivalent atoms:

#1  $-x+3/2, y+1/2, z$  #2  $x+1/2, -y+1/2, -z$  #3  $-x+2, -y+1, -z$  #4  $x, -y+1/2, z-1/2$

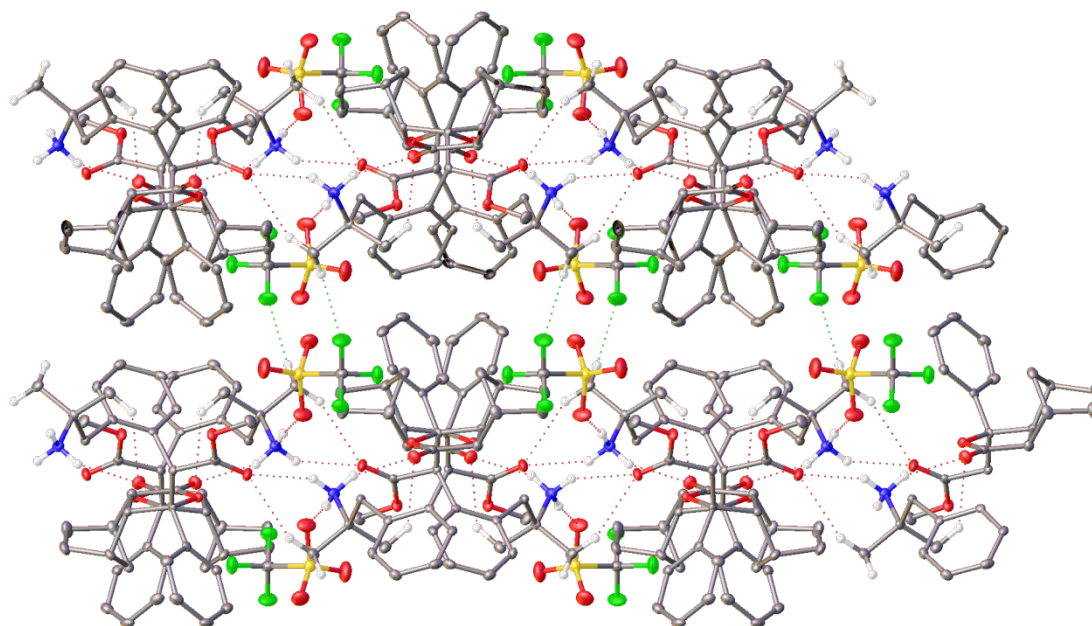

**Figure S23.** X-ray packing view (50 % probability) of **9d** showing showing the three-dimensional net, formed through hydrogen bonds, viewed down the crystallographic *b* axis.

**Table S18.** Hydrogen bonds for compound **9f**·Et<sub>2</sub>O (Å and deg).

| D–H···A               | d(D–H)  | d(H···A) | d(D···A)   | <(DHA)    |
|-----------------------|---------|----------|------------|-----------|
| N(1)–H(01B)···O(9)    | 0.87(2) | 2.06(2)  | 2.916(2)   | 167.1(19) |
| C(7)–H(7A)···O(6)     | 0.99    | 2.37     | 3.1974(19) | 140.1     |
| N(1)–H(01A)···O(3)#1  | 0.91(2) | 1.94(2)  | 2.8063(19) | 158.7(16) |
| N(1)–H(01C)···O(83)#2 | 0.90(2) | 2.19(2)  | 2.9997(18) | 150.0(18) |
| C(9)–H(9A)···O(7)#3   | 0.98    | 2.52     | 3.398(2)   | 148.3     |
| C(81)–H(81C)···O(8)#4 | 0.98    | 2.57     | 3.468(3)   | 153.1     |

Symmetry transformations used to generate equivalent atoms:

#1  $x+1/2, -y+1/2, z-1/2$  #2  $x, y, z-1$  #3  $x-1, y, z$  #4  $x, y, z+1$

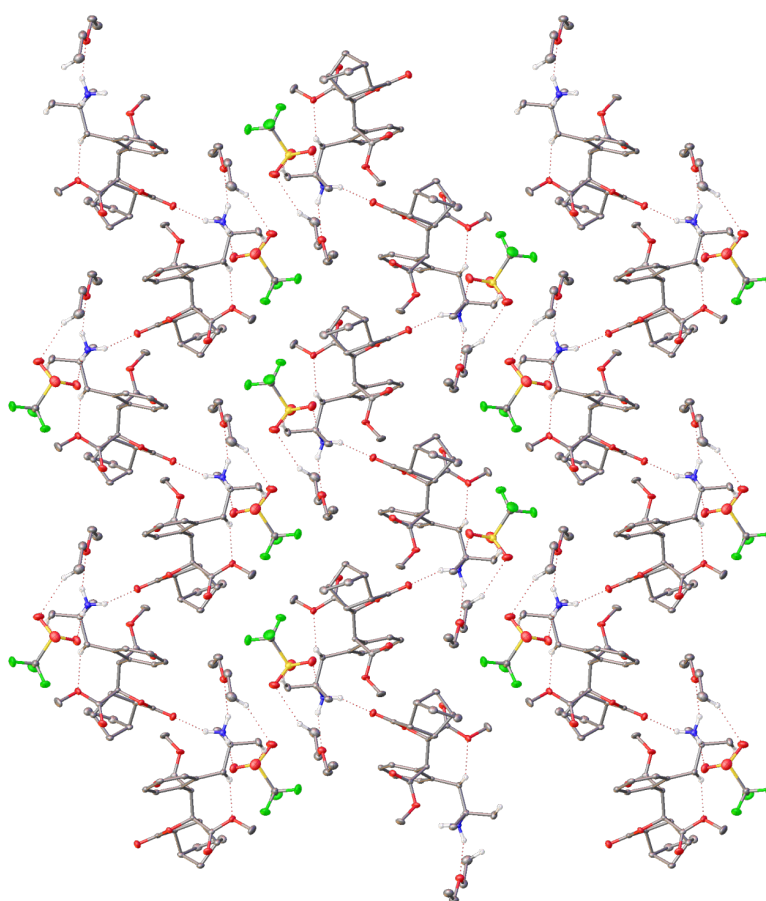

**Figure S24.** X-ray packing view (50 % probability) of **9f**·Et<sub>2</sub>O showing the layers parallel to the ab plane, viewed down the crystallographic *c* axis.

**Table S19.** Hydrogen bonds for compound **10c**·H<sub>2</sub>O (Å and deg).

| D–H···A               | d(D–H)    | d(H···A)  | d(D···A) | <(DHA)    |
|-----------------------|-----------|-----------|----------|-----------|
| C(7)–H(7A)···O(1)     | 0.99      | 2.49      | 3.389(2) | 150.7     |
| N(1)–H(01A)···O(1)    | 0.922(16) | 2.226(18) | 3.064(2) | 150.8(19) |
| N(1)–H(01A)···O(4)    | 0.922(16) | 2.53(2)   | 3.104(2) | 120.8(17) |
| N(1)–H(01B)···O(99)#1 | 0.918(16) | 1.867(17) | 2.774(2) | 169(2)    |
| N(1)–H(01C)···O(3)#1  | 0.926(16) | 2.014(17) | 2.912(2) | 163(2)    |
| O(2)–H(2)···O(4)      | 0.84      | 1.87      | 2.710(2) | 173.1     |
| O(99)–H(99A)···O(5)#2 | 0.842(10) | 2.158(15) | 2.890(2) | 145(2)    |
| O(99)–H(99B)···O(1)   | 0.843(9)  | 2.114(14) | 2.881(2) | 151(2)    |

Symmetry transformations used to generate equivalent atoms:

#1 -x+1,-y,-z+1 #2 x+1,y,z

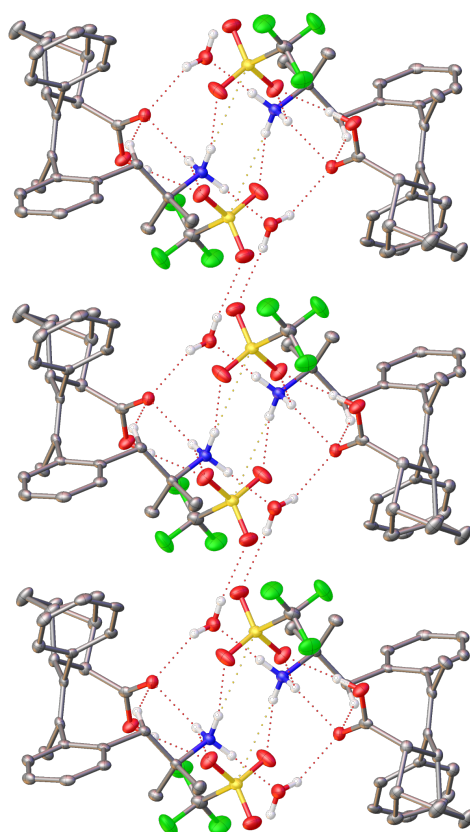

**Figure S25.** X-ray packing view (50 % probability) of **10c**·H<sub>2</sub>O showing the double chains parallel to the *a* axis formed through hydrogen bonds.



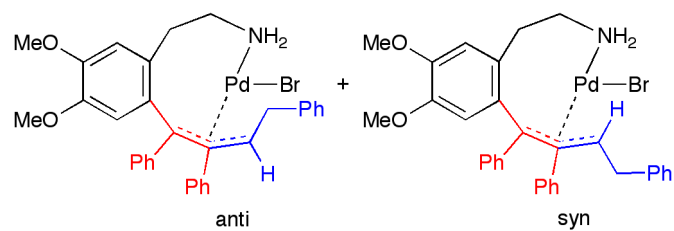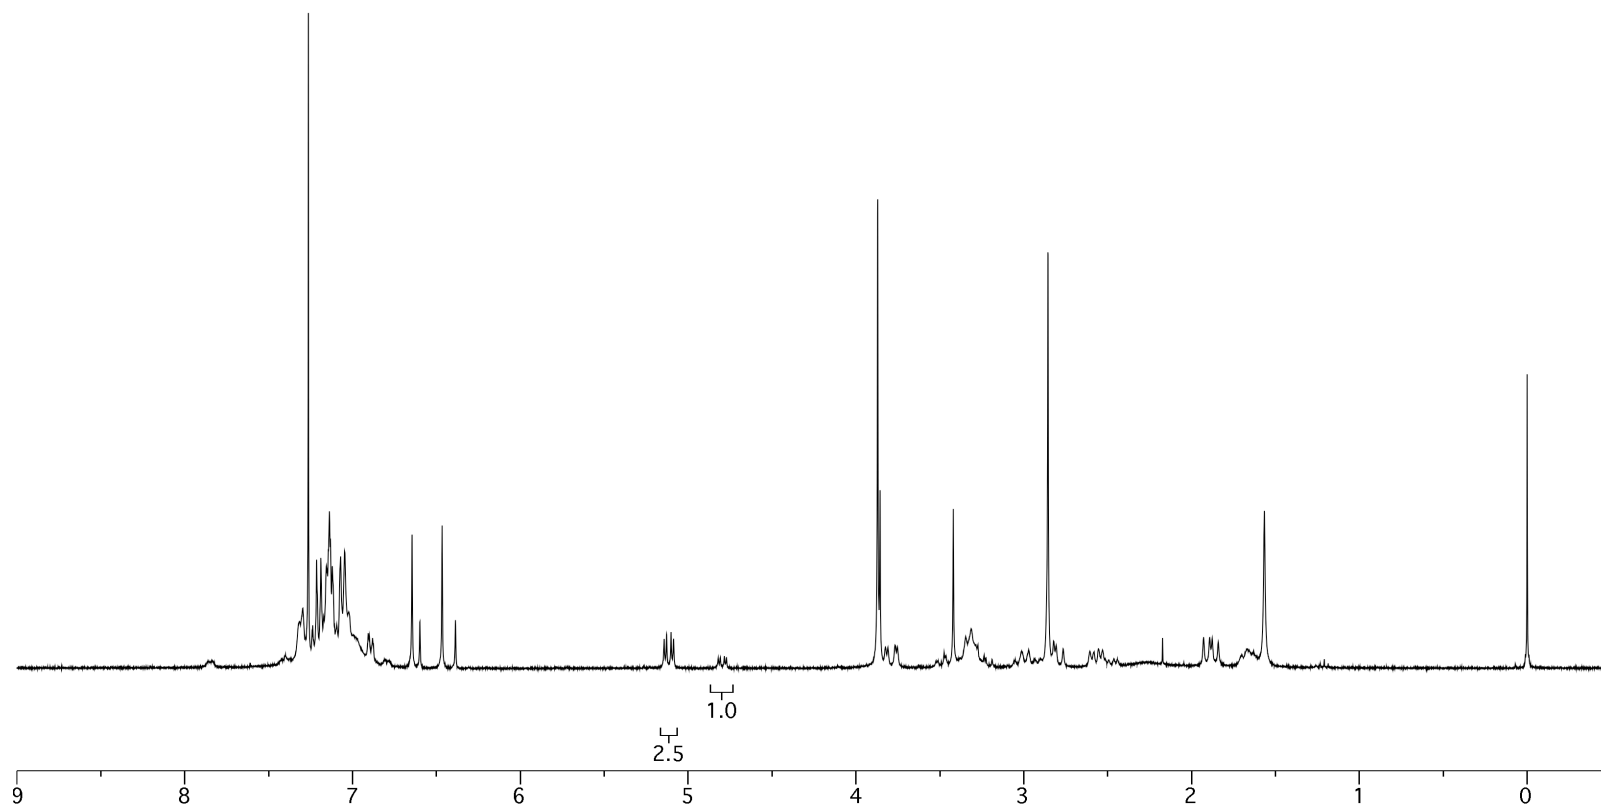

**Figure S26.**  $^1\text{H}$  NMR spectrum of a 2.5:1 mixture of *anti/syn-1a* (300.1 MHz,  $\text{CDCl}_3$ , 25  $^\circ\text{C}$ )  
 (From left to right, the asterisks indicate the signals corresponding to  $\text{CHCl}_3$ , and  $\text{H}_2\text{O}$ )

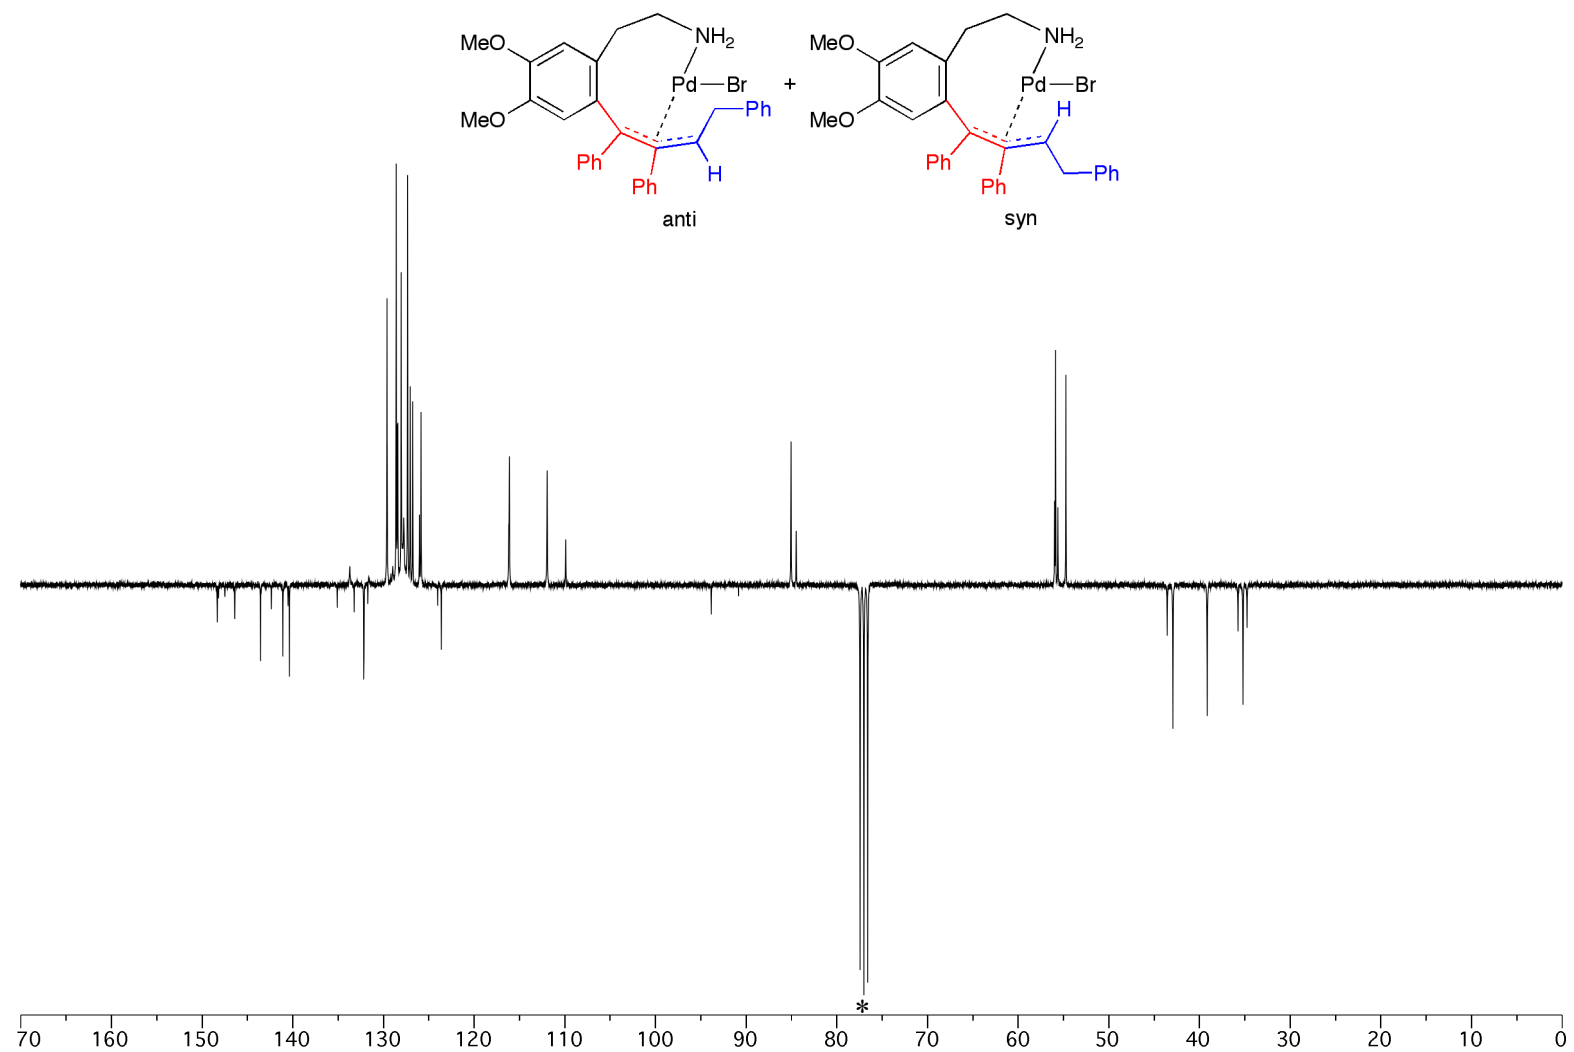

**Figure S27.**  $^{13}\text{C}\{^1\text{H}\}$  APT NMR spectrum of 2.5:1 mixture of *anti*/*syn*-**1a** (75.5 MHz,  $\text{CDCl}_3$ , 25 °C)

(The asterik indicates the signal corresponding to  $\text{CDCl}_3$ )

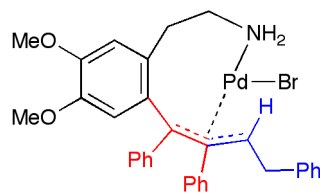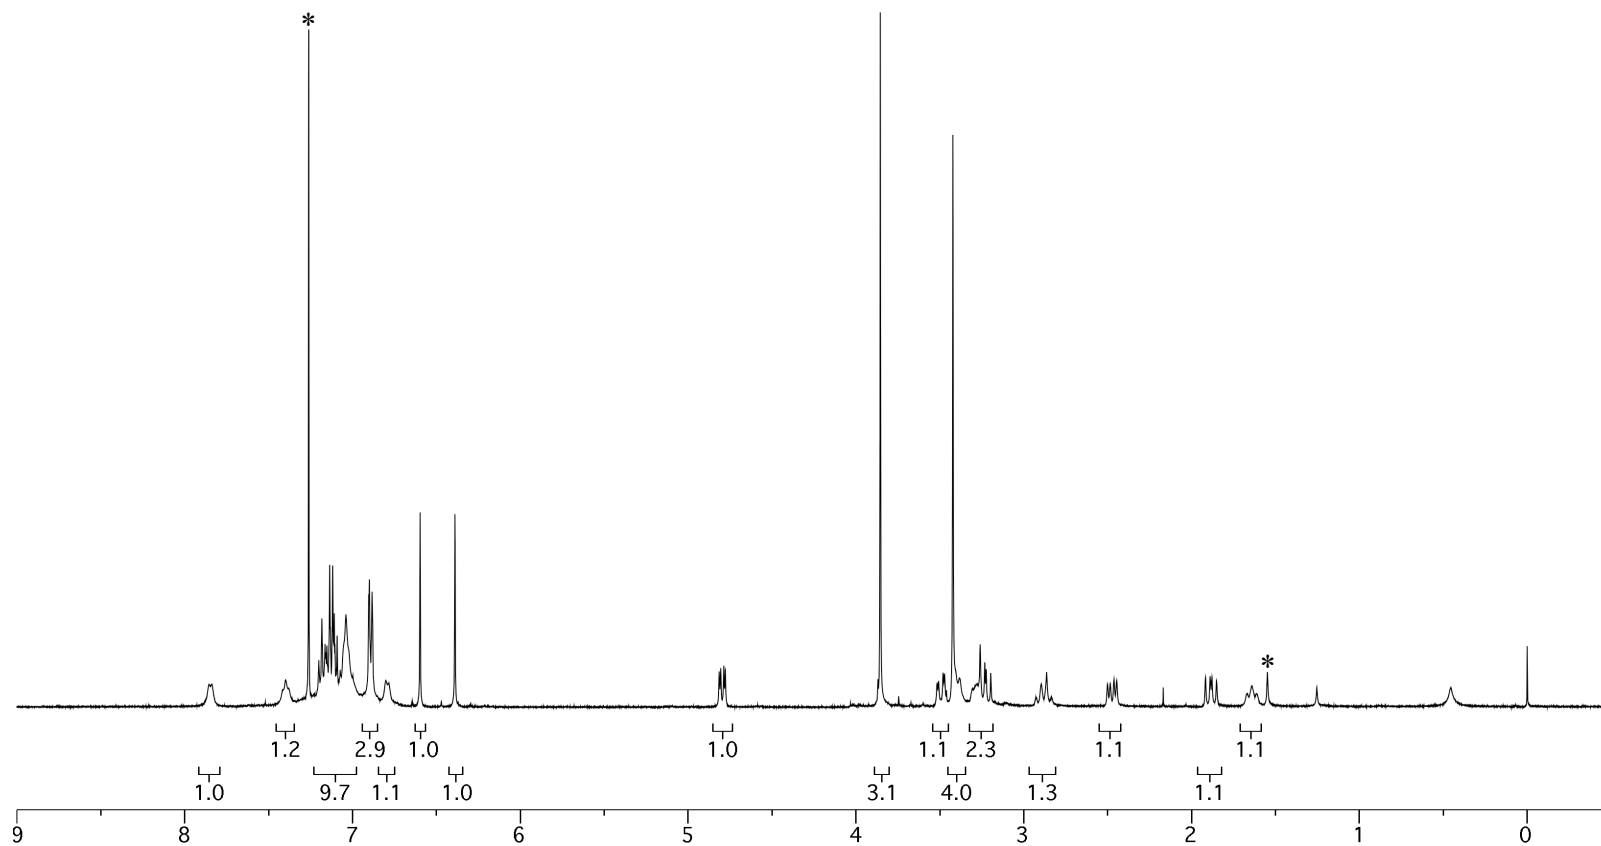

**Figure S28.** <sup>1</sup>H NMR spectrum of *syn-1a* (400.9 MHz, CDCl<sub>3</sub>, 25 °C)  
 (From left to right, the asteriks indicate the signals corresponding to CHCl<sub>3</sub>, and H<sub>2</sub>O)

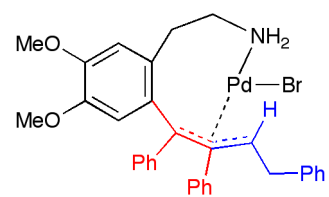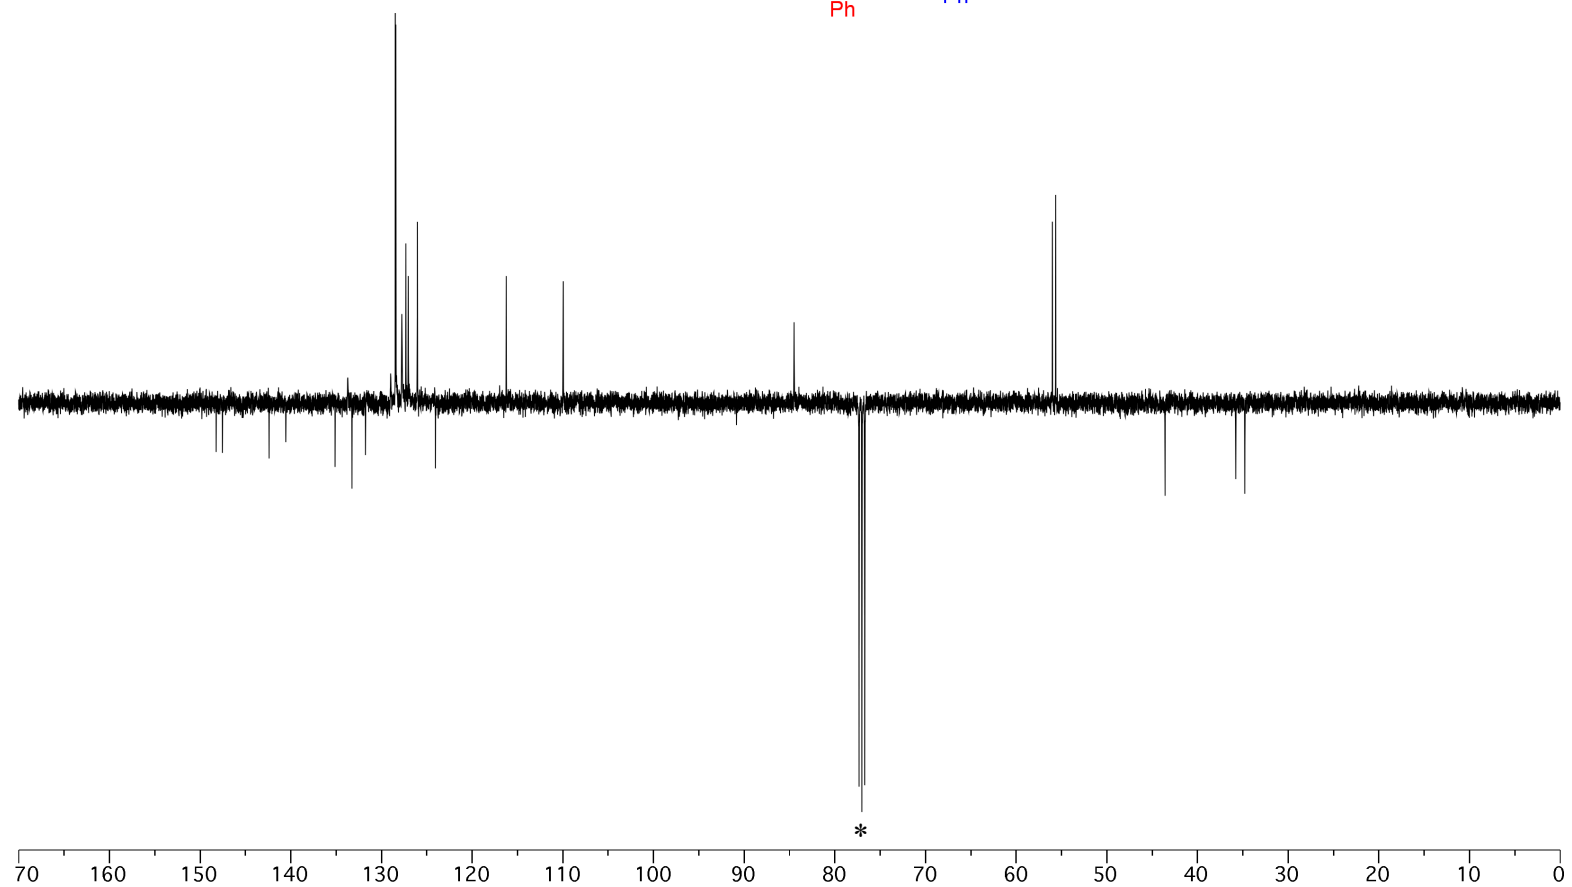

**Figure S29.**  $^{13}\text{C}\{^1\text{H}\}$  APT NMR spectrum of *syn-1a* (100.8 MHz,  $\text{CDCl}_3$ , 25 °C)

(The asterik indicates the signal corresponding to  $\text{CDCl}_3$ )

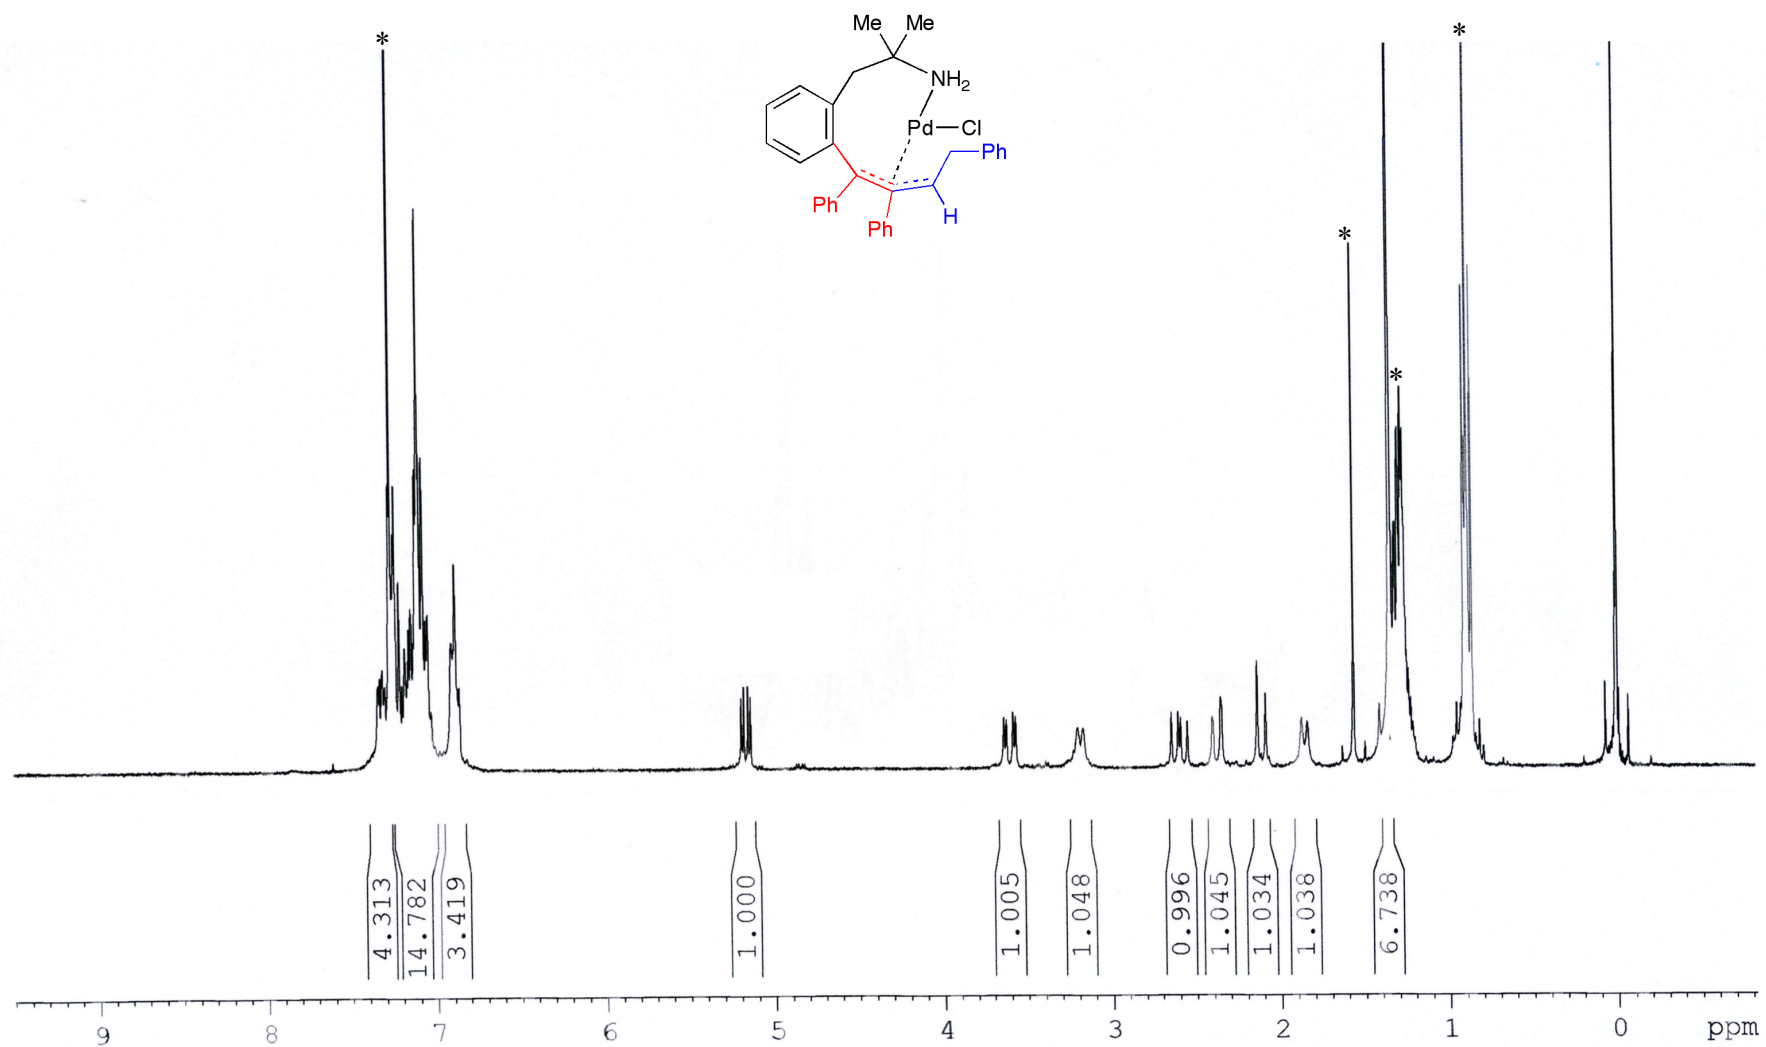

**Figure S30.** <sup>1</sup>H NMR spectrum of *anti-1b* (300.1 MHz, CDCl<sub>3</sub>, 25 °C)

(From left to right, the asteriks indicate the signals corresponding to CHCl<sub>3</sub>, H<sub>2</sub>O, and *n*-pentane)

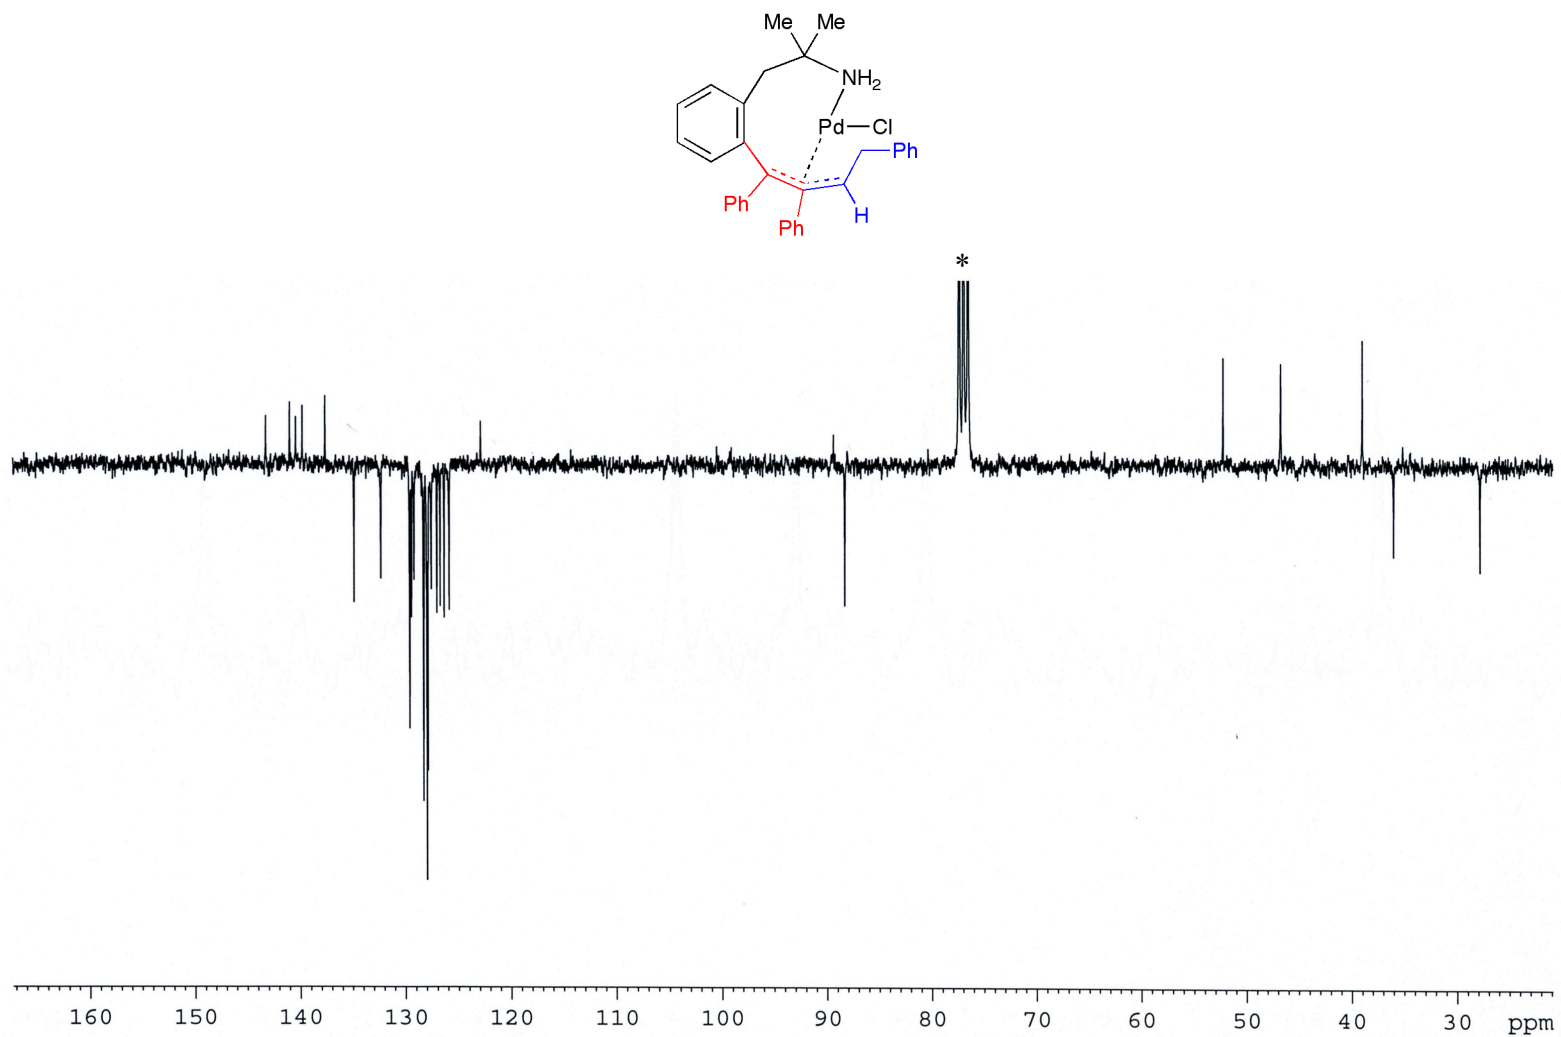

**Figure S31.**  $^{13}\text{C}\{^1\text{H}\}$  APT NMR spectrum of *anti*-**1b** (75.5 MHz,  $\text{CDCl}_3$ , 25 °C)  
(The asterik indicates the signal corresponding to  $\text{CDCl}_3$ )

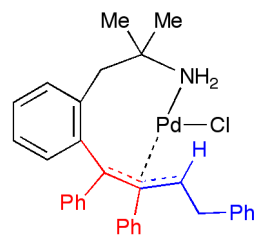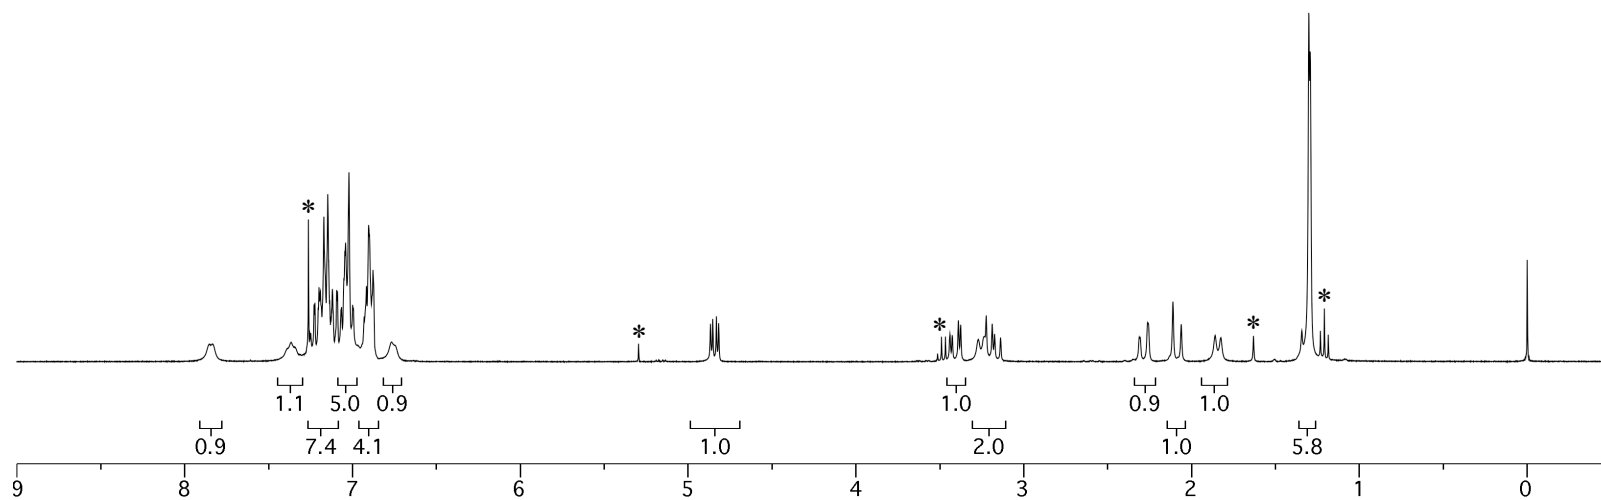

**Figure S32.**  $^1\text{H}$  NMR spectrum of *syn-1b* (300.1 MHz,  $\text{CDCl}_3$ , 25  $^\circ\text{C}$ )

(From left to right, the asteriks indicate the signals corresponding to  $\text{CHCl}_3$ ,  $\text{CH}_2\text{Cl}_2$ ,  $\text{Et}_2\text{O}$ ,  $\text{H}_2\text{O}$ , and  $\text{Et}_2\text{O}$ )

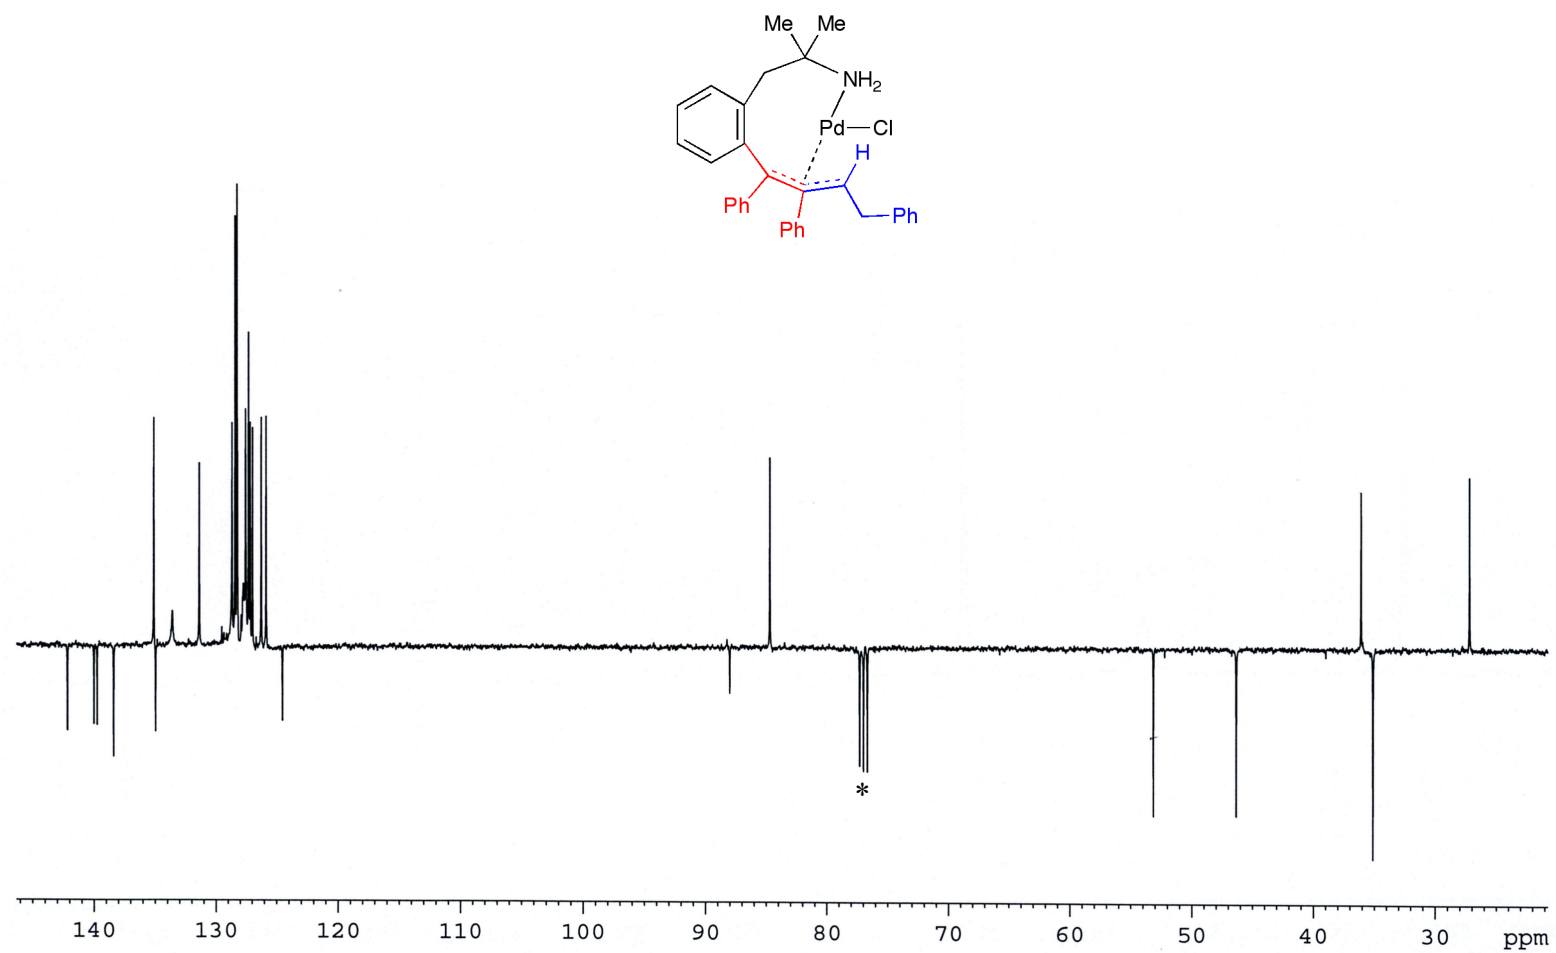

**Figure S33.**  $^{13}\text{C}\{^1\text{H}\}$  APT NMR spectrum of *syn-1b* (100.8 MHz,  $\text{CDCl}_3$ , 25 °C)  
(The asterik indicates the signal corresponding to  $\text{CDCl}_3$ )



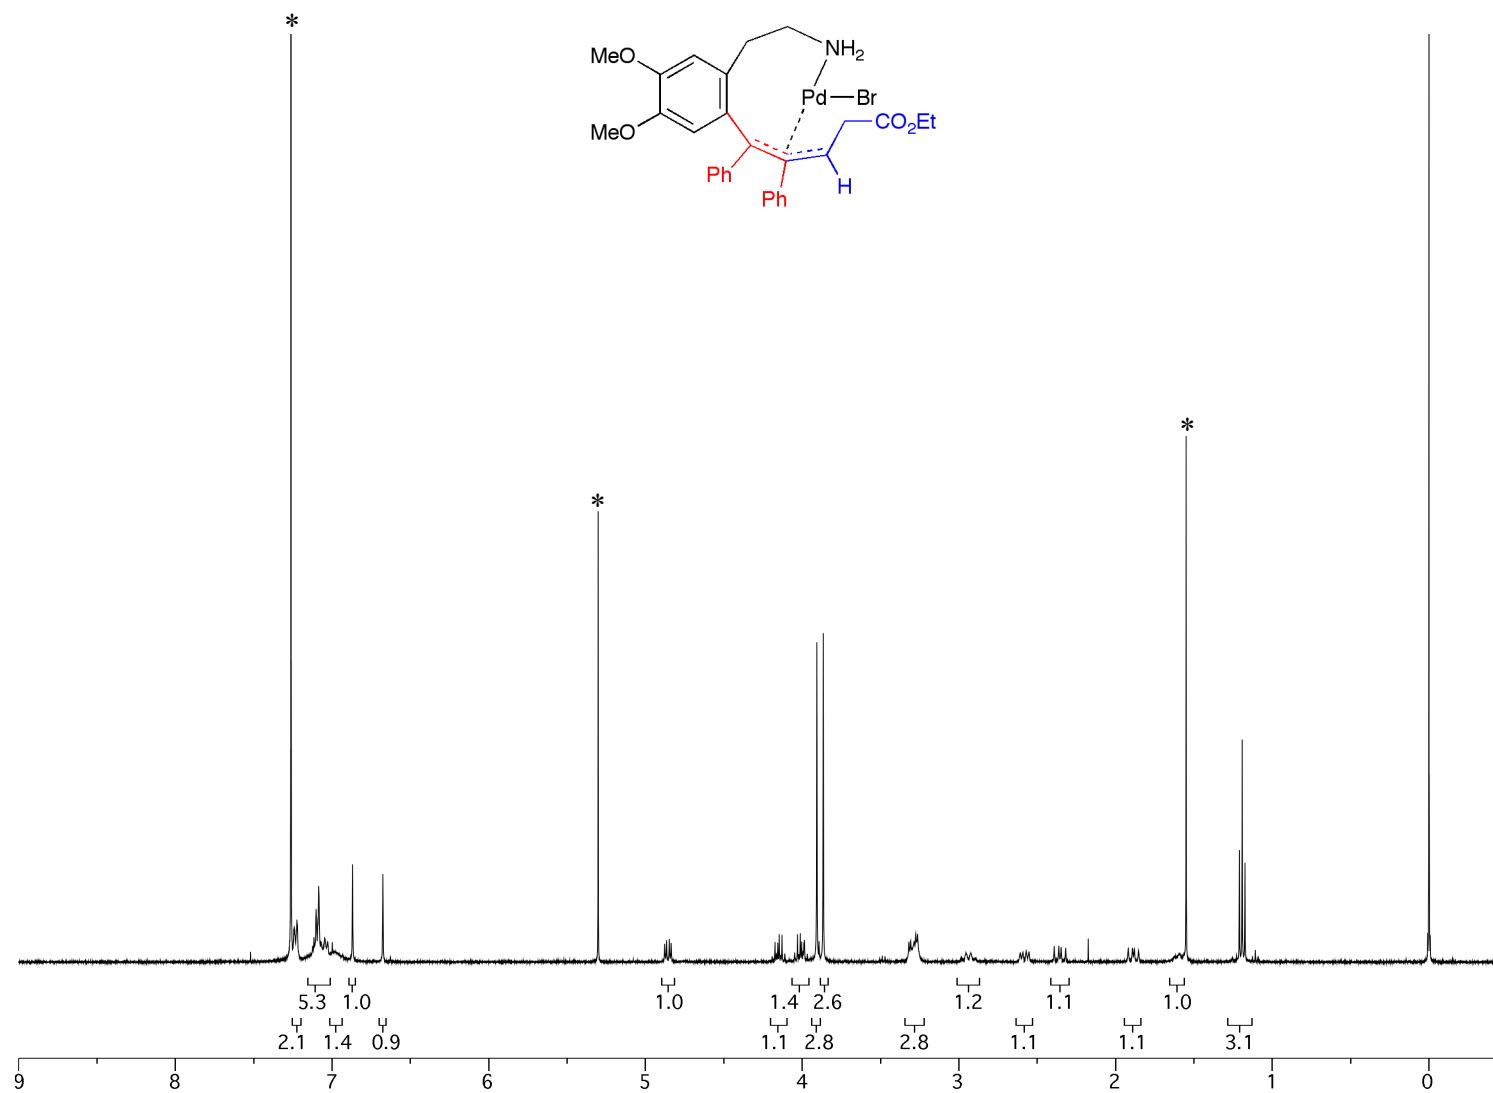

**Figure S34.**  $^1\text{H}$  NMR spectrum of *anti*-**2a** (400.9 MHz,  $\text{CDCl}_3$ , 25 °C)  
 (From left to right, the asterisks indicate the signals corresponding to  $\text{CHCl}_3$ ,  $\text{CH}_2\text{Cl}_2$ , and  $\text{H}_2\text{O}$ )

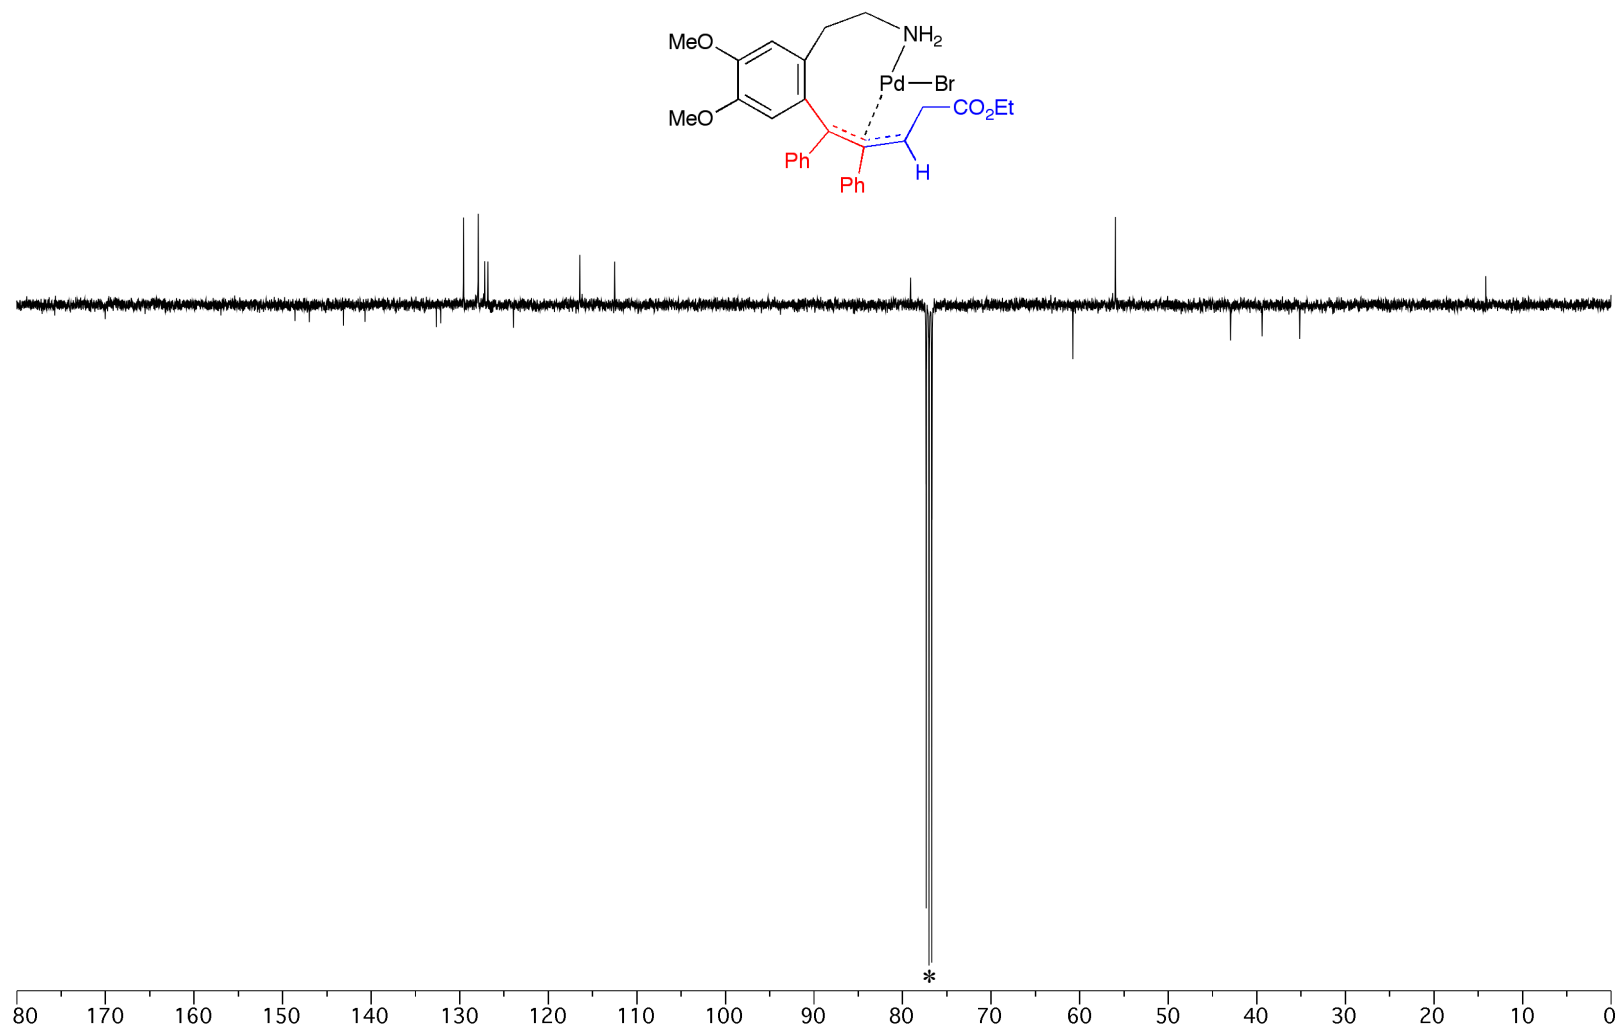

**Figure S35.**  $^{13}\text{C}\{^1\text{H}\}$  APT NMR spectrum of *anti-2a* (100.8 MHz,  $\text{CDCl}_3$ , 25 °C)

(The asterik indicates the signal corresponding to  $\text{CDCl}_3$ )

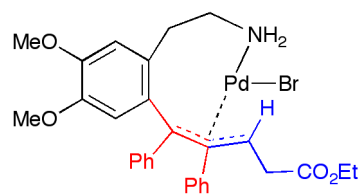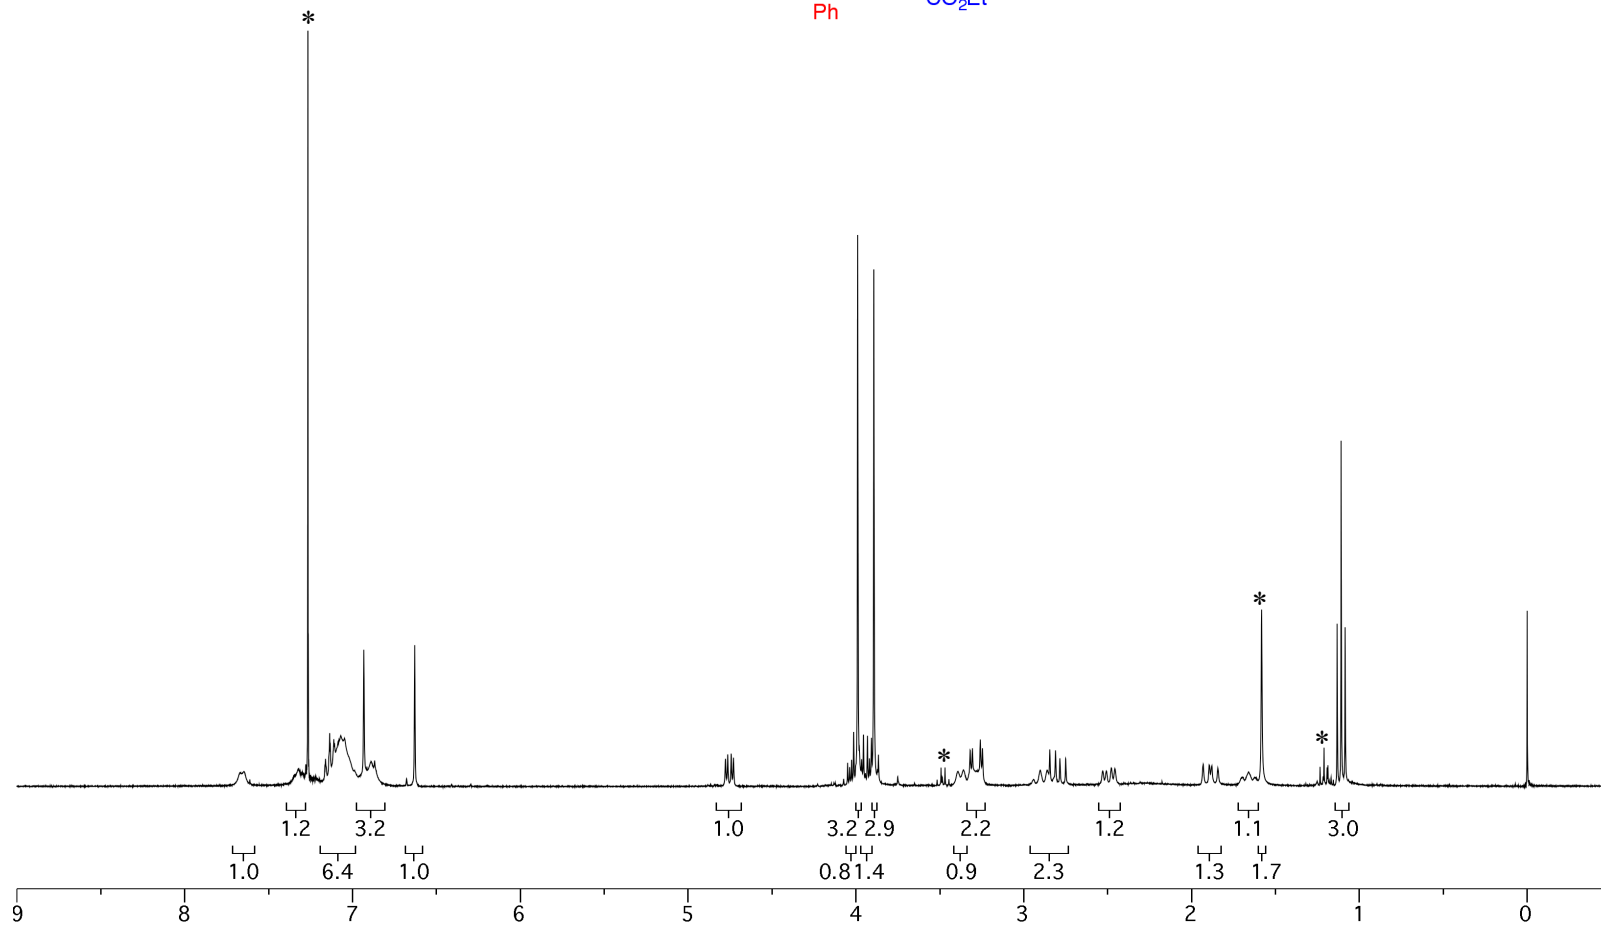

**Figure S36.**  $^1\text{H}$  NMR spectrum of *syn-2a* (300.1 MHz,  $\text{CDCl}_3$ , 25 °C)

(From left to right, the asteriks indicate the signals corresponding to  $\text{CHCl}_3$ ,  $\text{Et}_2\text{O}$ ,  $\text{H}_2\text{O}$ , and  $\text{Et}_2\text{O}$ )

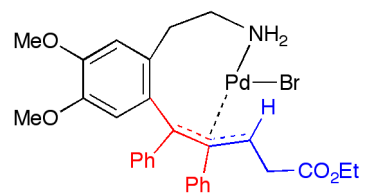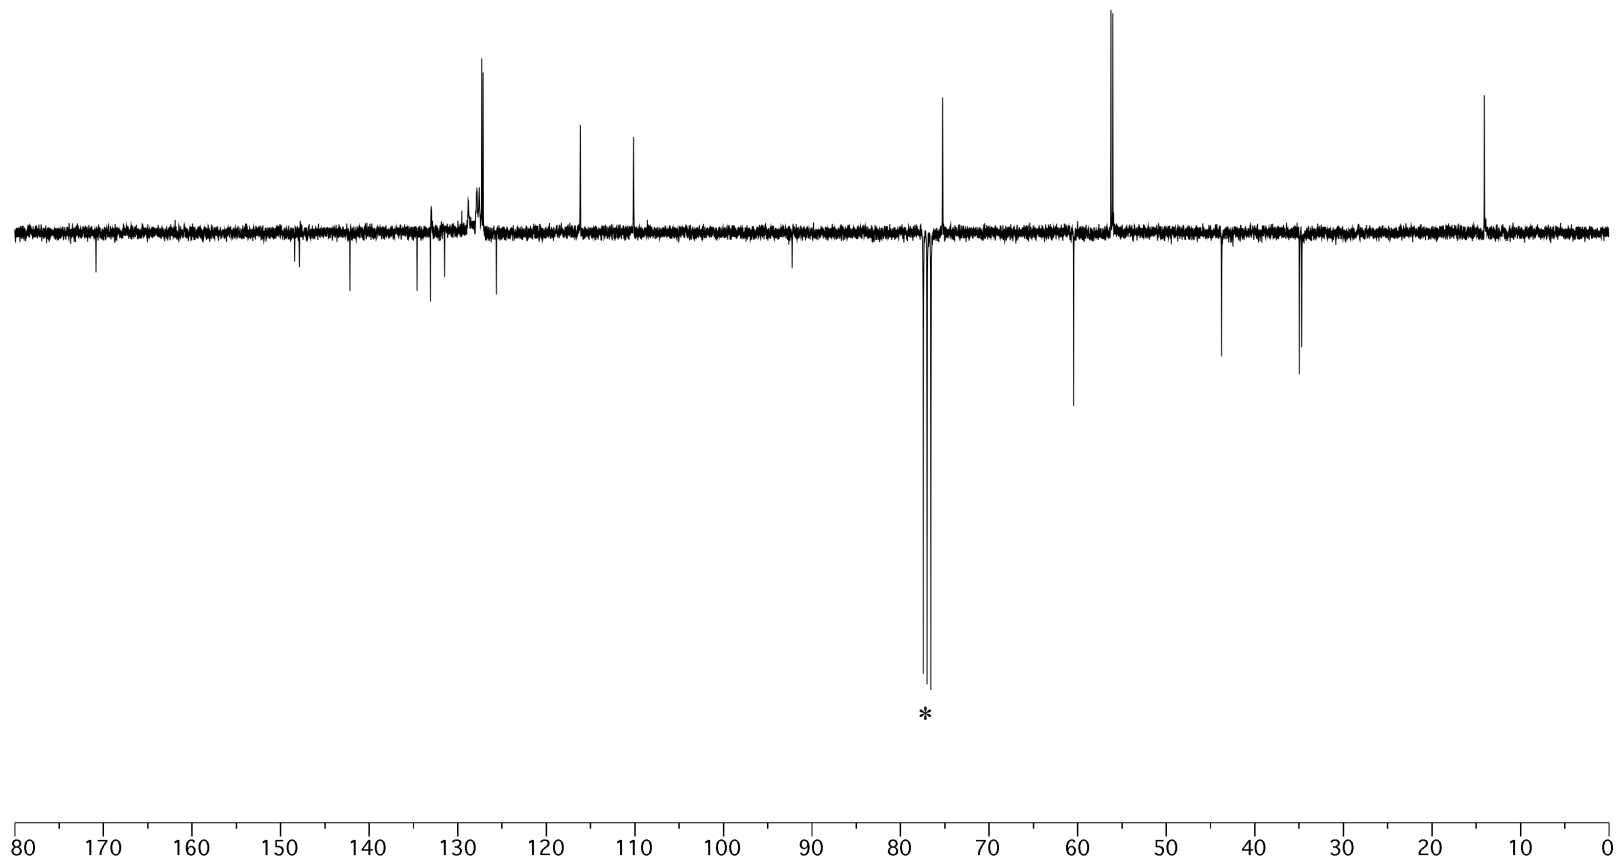

**Figure S37.**  $^{13}\text{C}\{^1\text{H}\}$  APT NMR spectrum of *syn-2a* (75.5 MHz,  $\text{CDCl}_3$ , 25 °C)

(The asterik indicates the signal corresponding to  $\text{CDCl}_3$ )

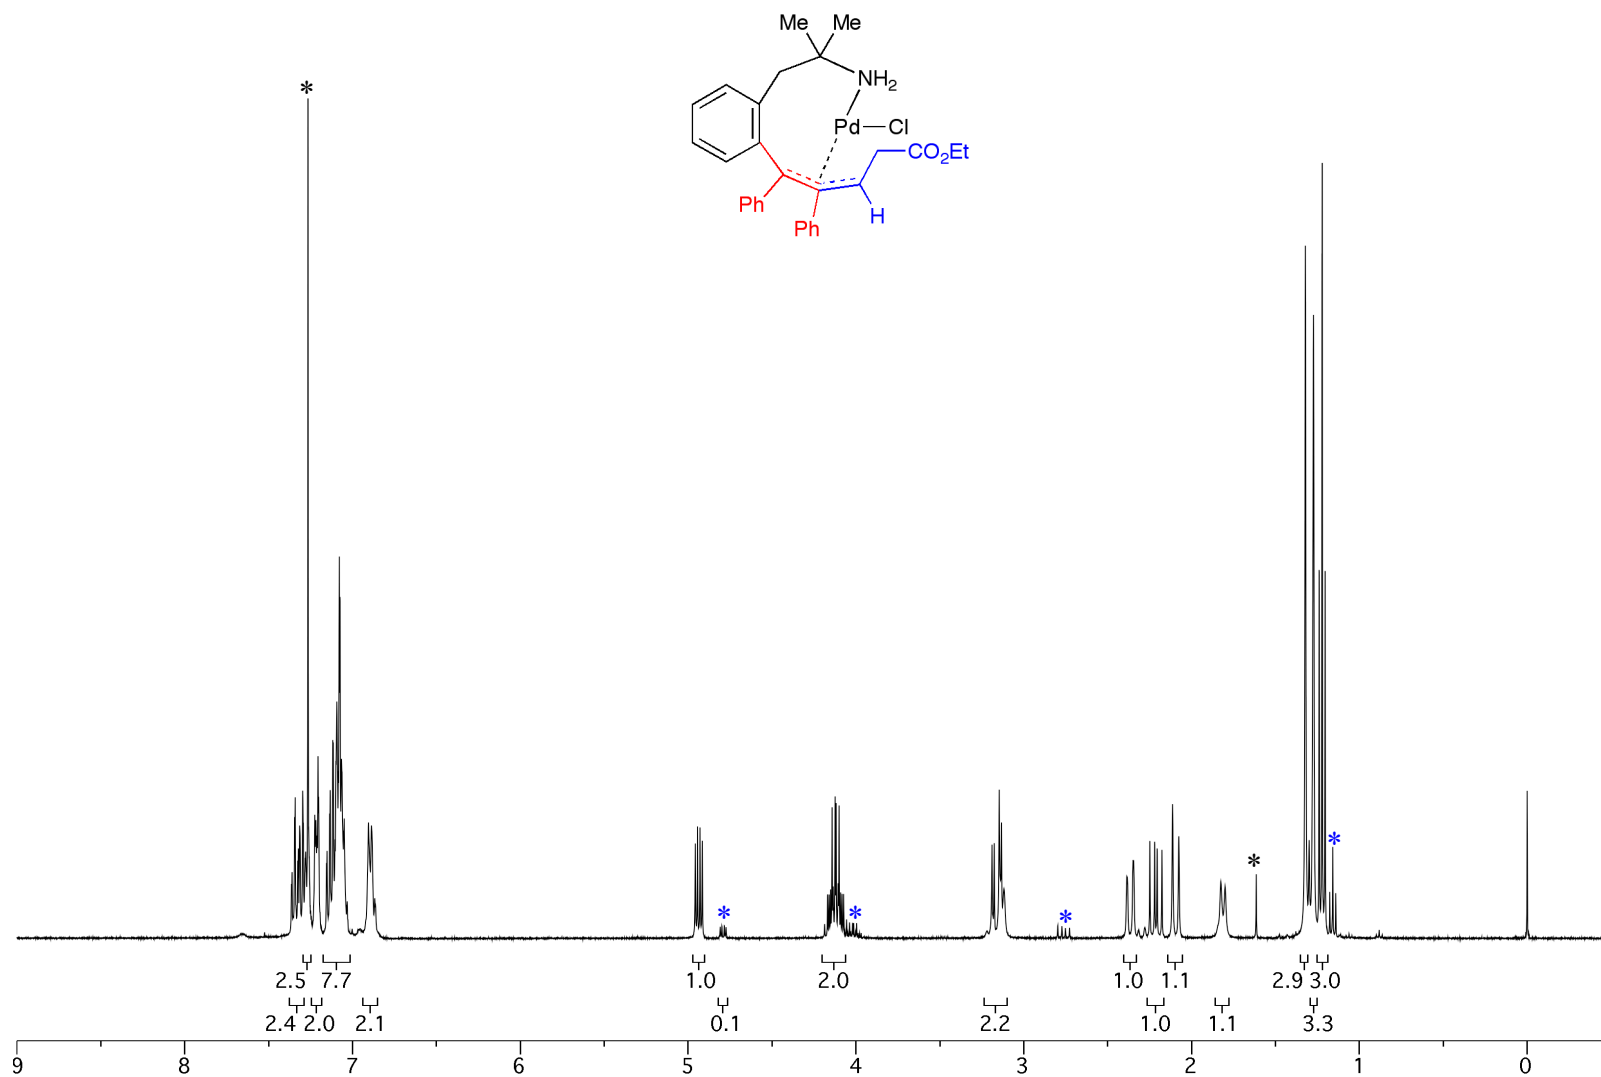

**Figure S38.** <sup>1</sup>H NMR spectrum of *anti*-2b (400.9 MHz, CDCl<sub>3</sub>, 25 °C)

(From left to right, the black asterisks indicate the signals corresponding to CHCl<sub>3</sub>, and H<sub>2</sub>O; the blue asterisks correspond to the *syn* isomer)



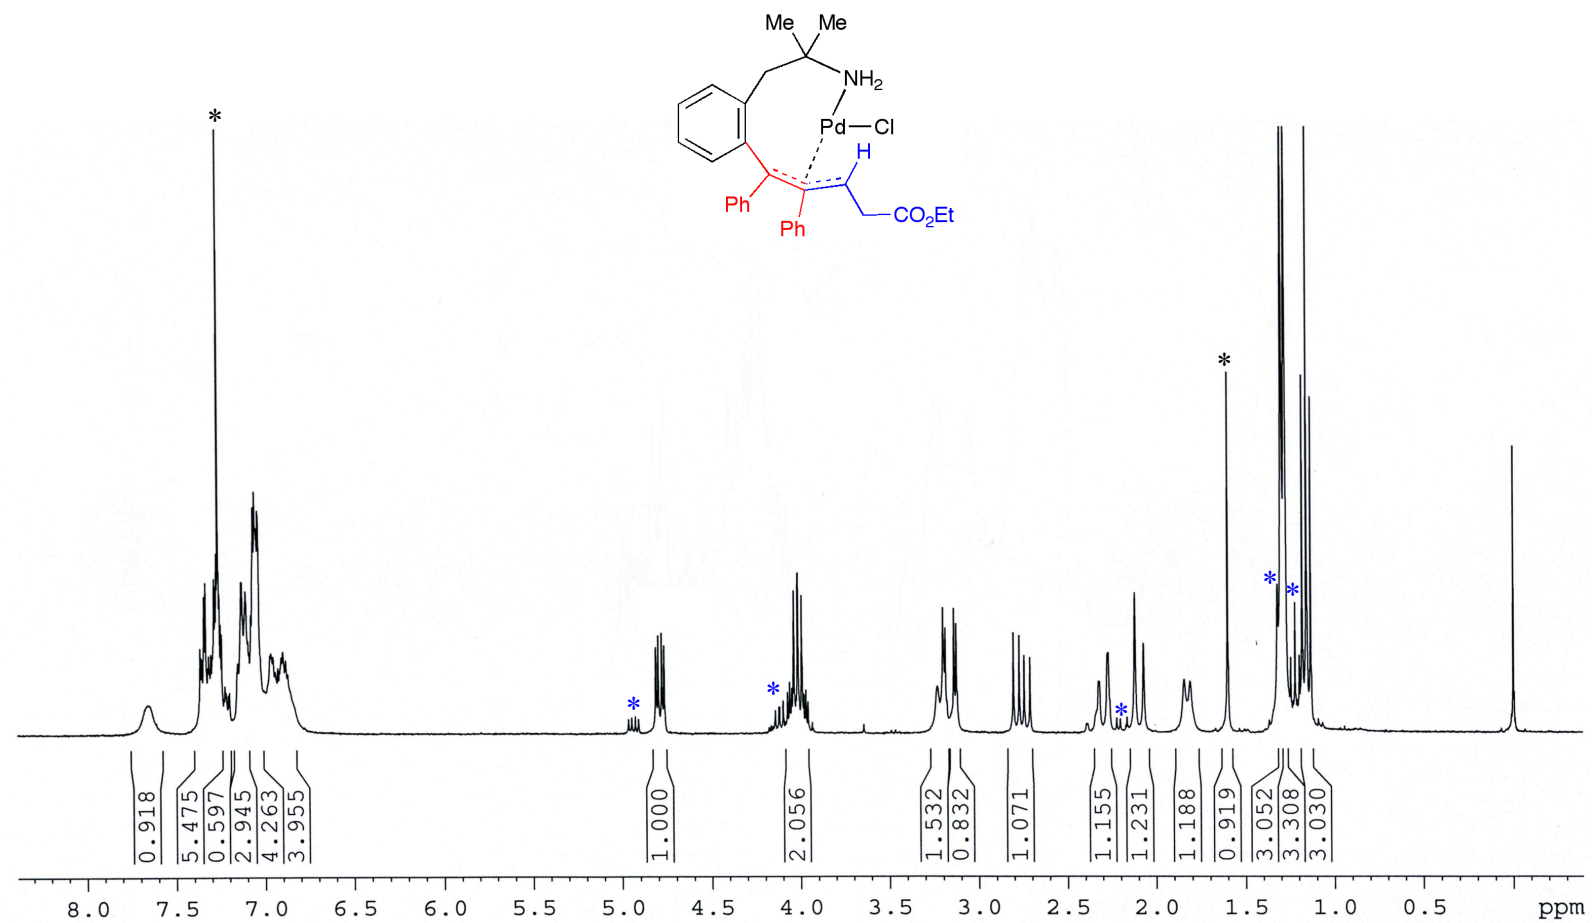

**Figure S40.** <sup>1</sup>H NMR spectrum of *syn-2b* (300.1 MHz, CDCl<sub>3</sub>, 25 °C)

(From left to right, the black asteriks indicate the signals corresponding to CHCl<sub>3</sub>, and H<sub>2</sub>O; the blue asteriks correspond to the *anti* isomer)

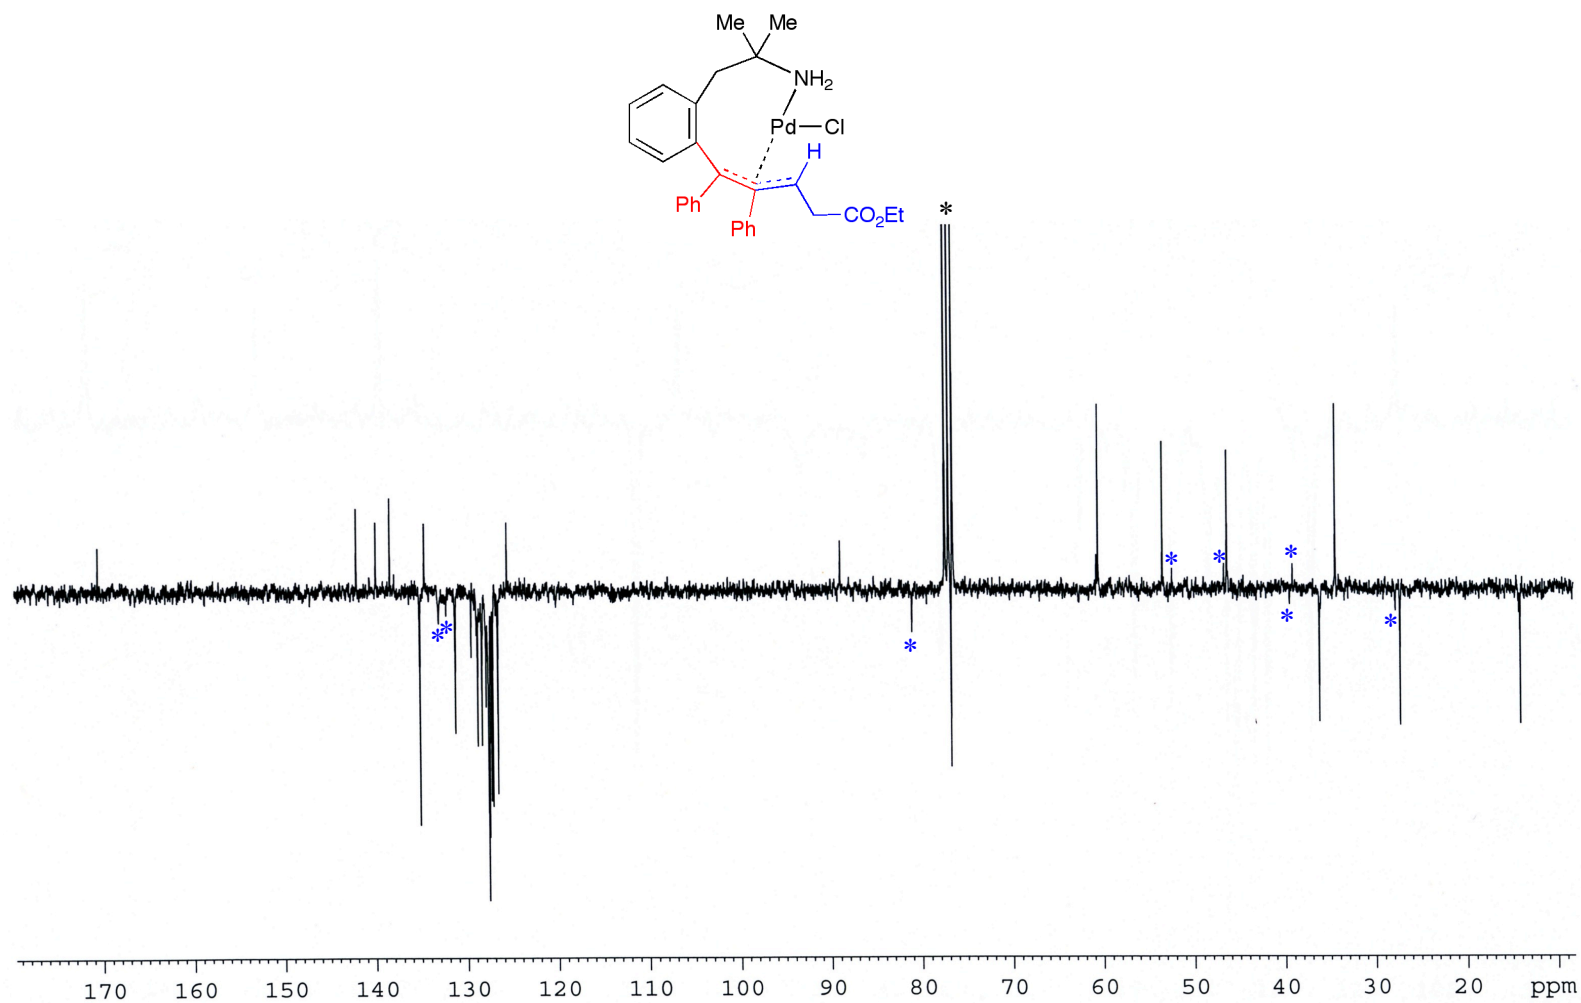

**Figure S41.**  $^{13}\text{C}\{^1\text{H}\}$  APT NMR spectrum of *syn*-**2b** (75.5 MHz,  $\text{CDCl}_3$ , 25 °C)  
(The black asterik indicates the signal corresponding to  $\text{CDCl}_3$ ; the blue asteriks correspond to the *anti* isomer)



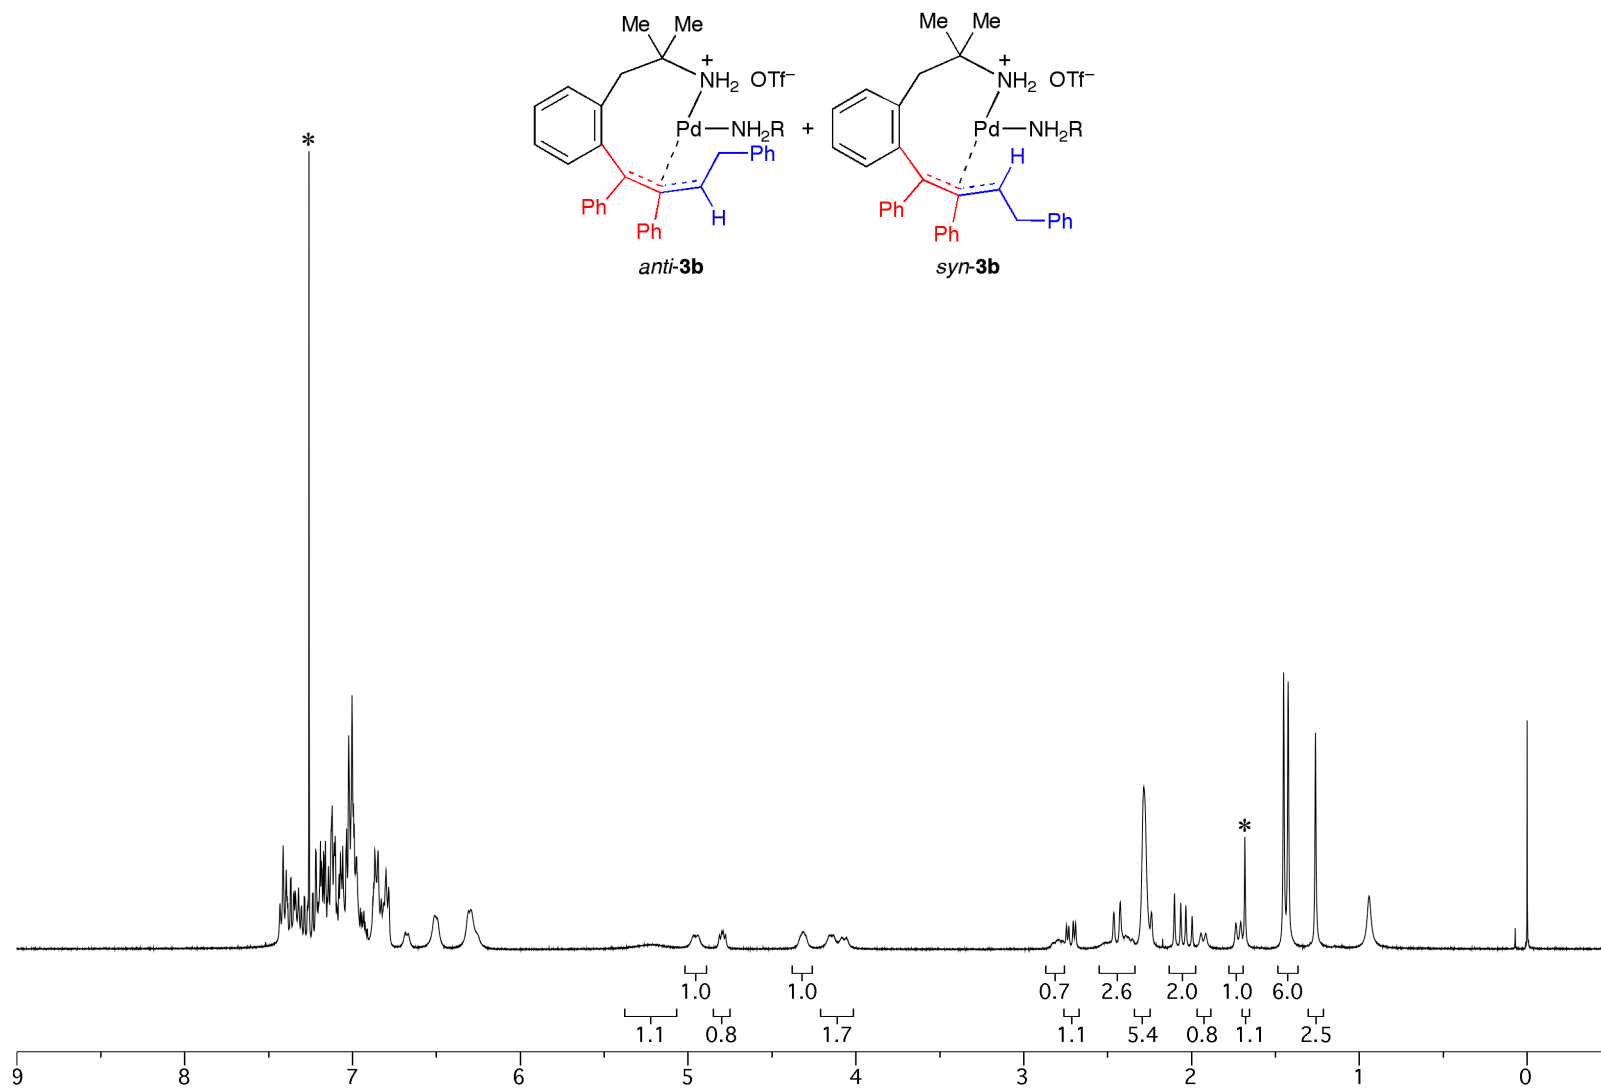

**Figure S42.** <sup>1</sup>H NMR spectrum of a 1:1.33 mixture of *anti*/*syn*-**3b** (400.9 MHz, CDCl<sub>3</sub>, 25 °C)  
 (From left to right, the black asterisks indicate the signals corresponding to CHCl<sub>3</sub>, and H<sub>2</sub>O)

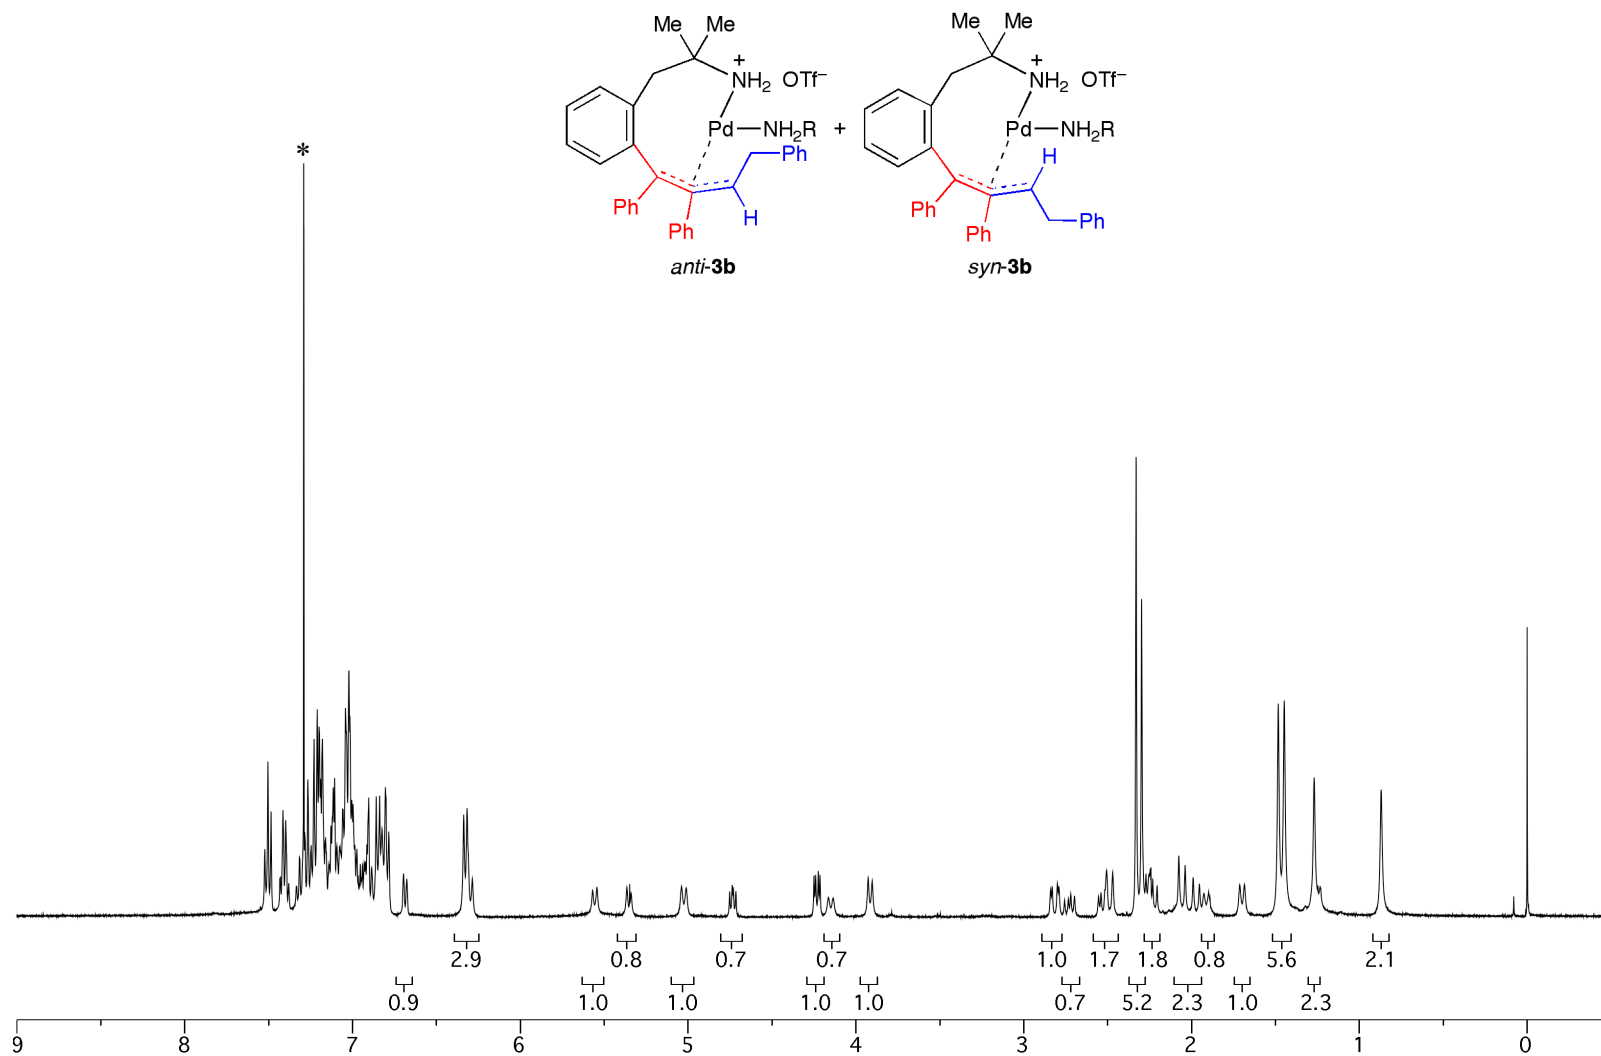

**Figure S43.**  $^1\text{H}$  NMR spectrum of a 1:1.33 mixture of *anti*/*syn*-**3b** (400.9 MHz,  $\text{CDCl}_3$ ,  $-40^\circ\text{C}$ )

(From left to right, the black asterik indicates the signal corresponding to  $\text{CHCl}_3$ .)

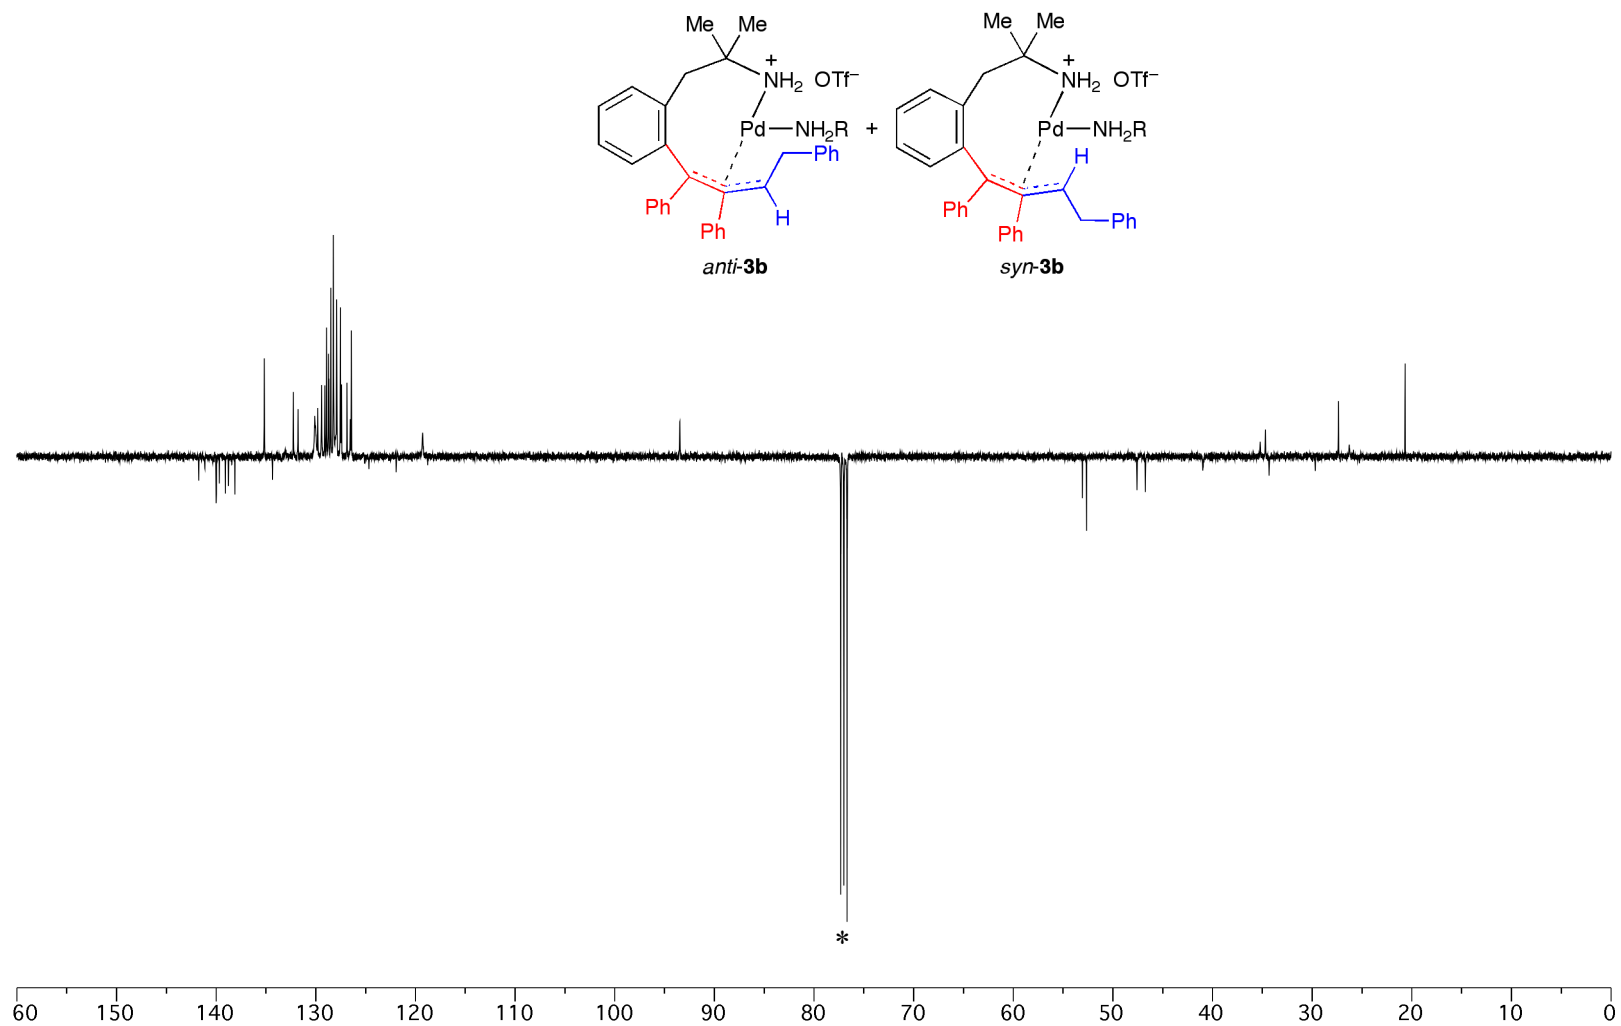

**Figure S44.**  $^{13}\text{C}\{^1\text{H}\}$  APT NMR spectrum of a 1:1.33 mixture of *anti/syn-3b* (100.8 MHz,  $\text{CDCl}_3$ , 25 °C)  
 (The black asterik indicates the signal corresponding to  $\text{CDCl}_3$ )

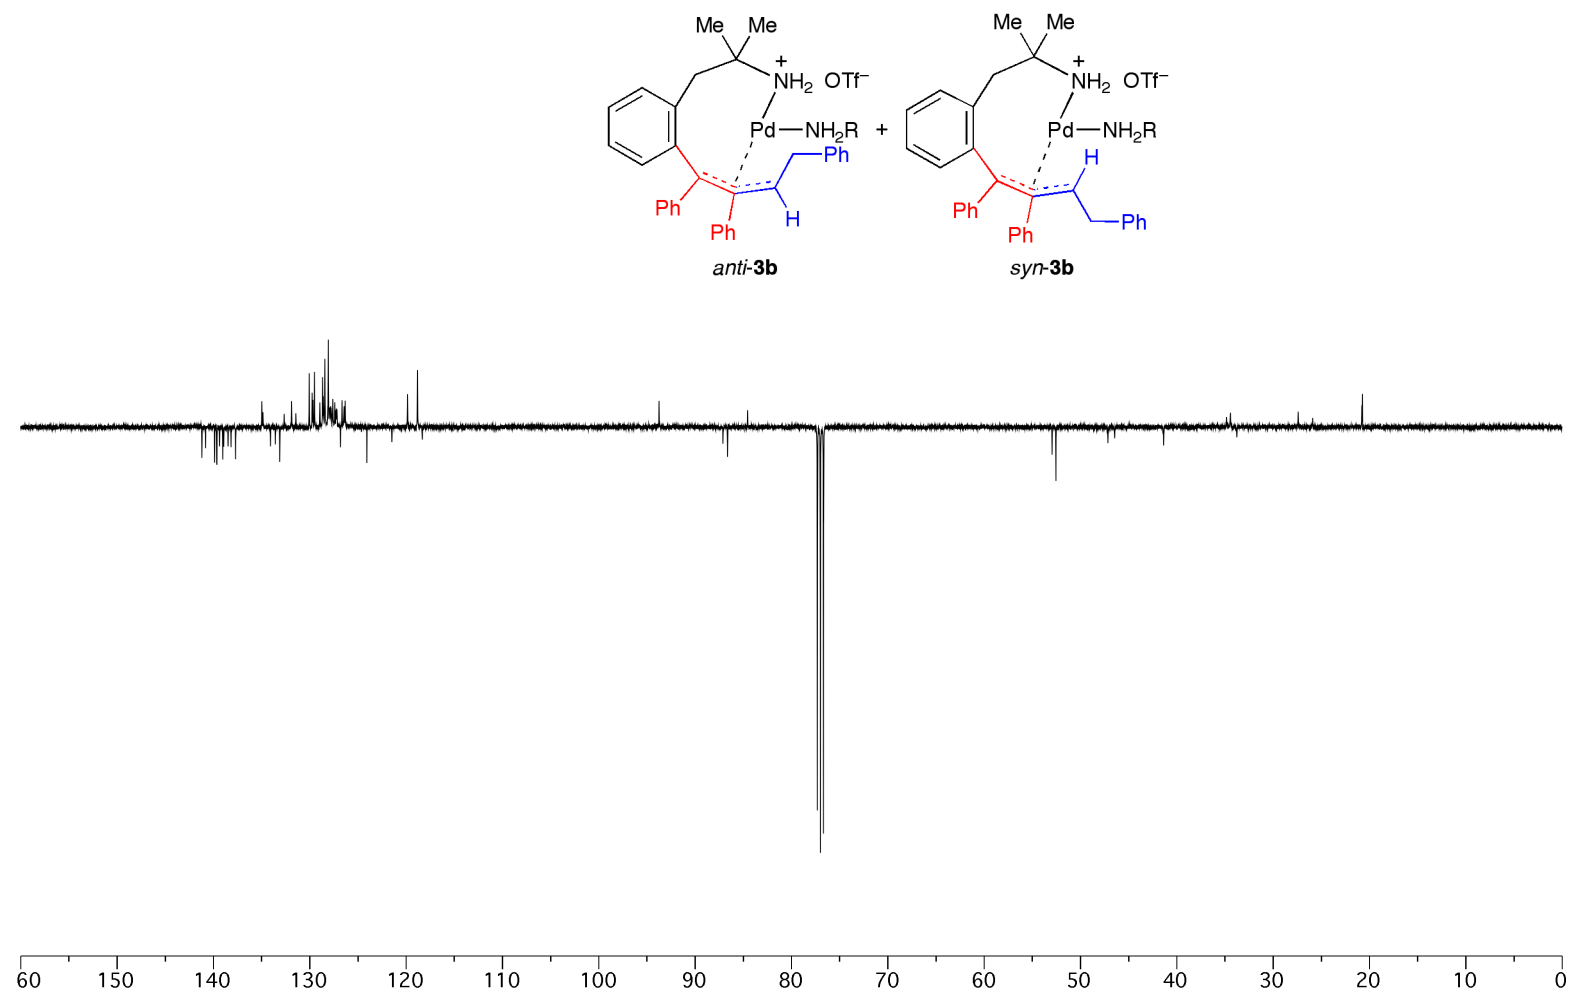

**Figure S45.**  $^{13}\text{C}\{^1\text{H}\}$  APT NMR spectrum of a 1:1.33 mixture of *anti/syn-3b* (100.8 MHz,  $\text{CDCl}_3$ ,  $-40\text{ }^\circ\text{C}$ )

(The black asterik indicates the signal corresponding to  $\text{CDCl}_3$ )

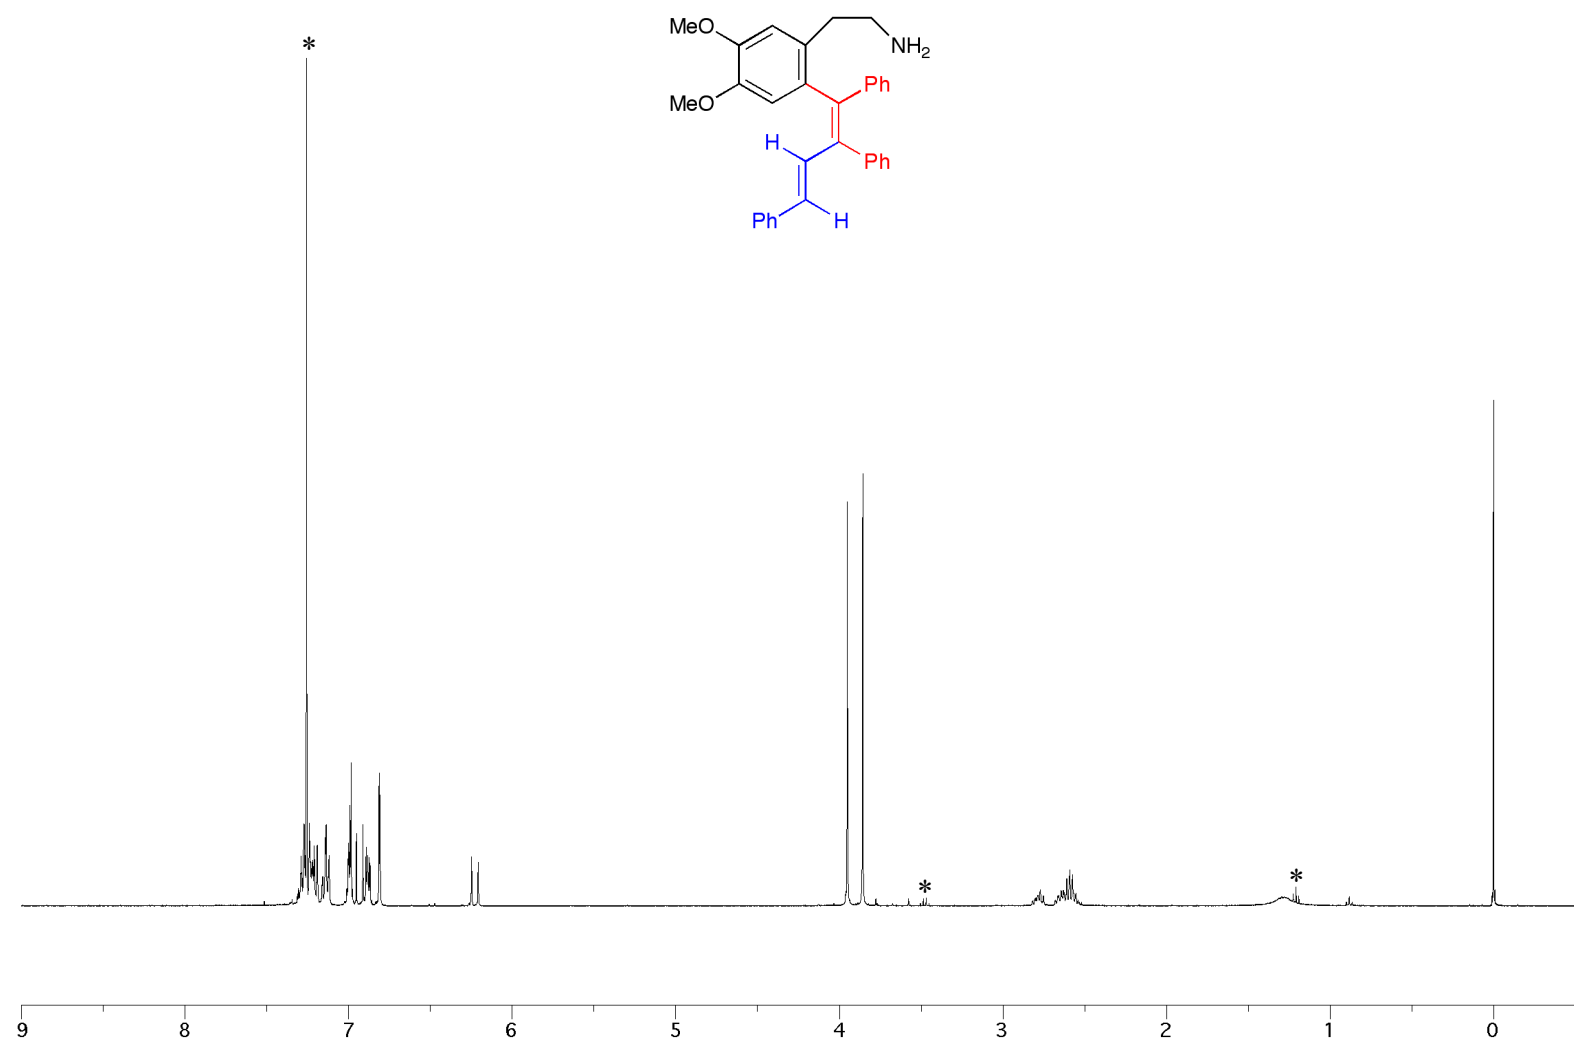

**Figure S46.**  $^1\text{H}$  NMR spectrum of **4a**· $1/2\text{H}_2\text{O}$  (400.9 MHz,  $\text{CDCl}_3$ , 25 °C)  
(From left to right, the asteriks indicate the signals corresponding to  $\text{CHCl}_3$ , and traces of  $\text{Et}_2\text{O}$ )

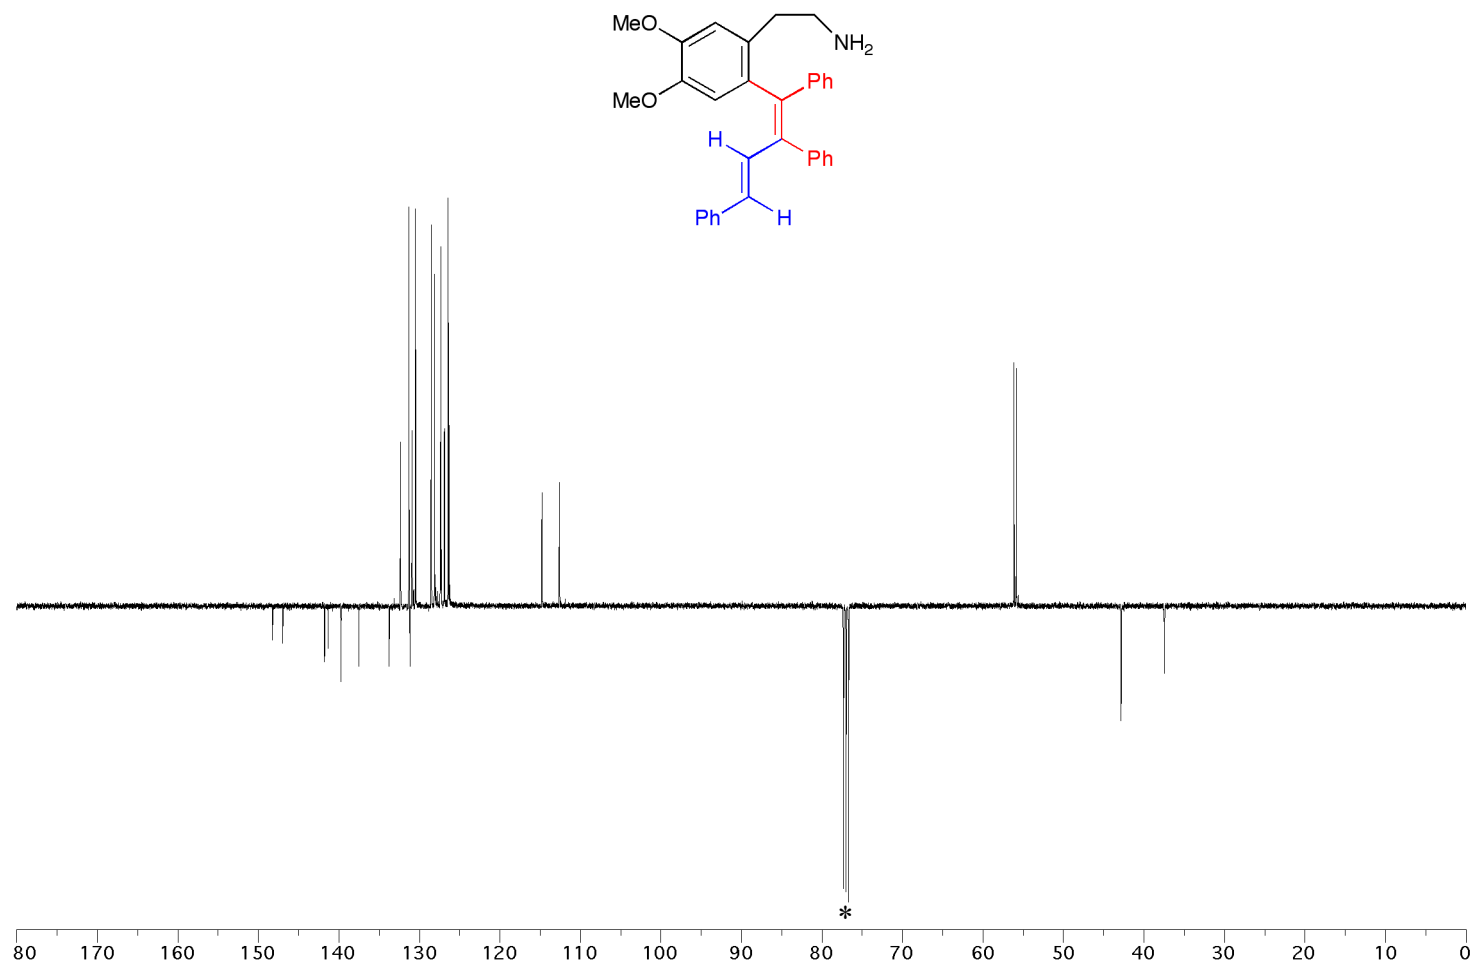

**Figure S47.**  $^{13}\text{C}\{^1\text{H}\}$  APT NMR spectrum of **4a**·1/2H<sub>2</sub>O (100.8 MHz, CDCl<sub>3</sub>, 25 °C)  
(The asterik indicates the signal corresponding to CDCl<sub>3</sub>)

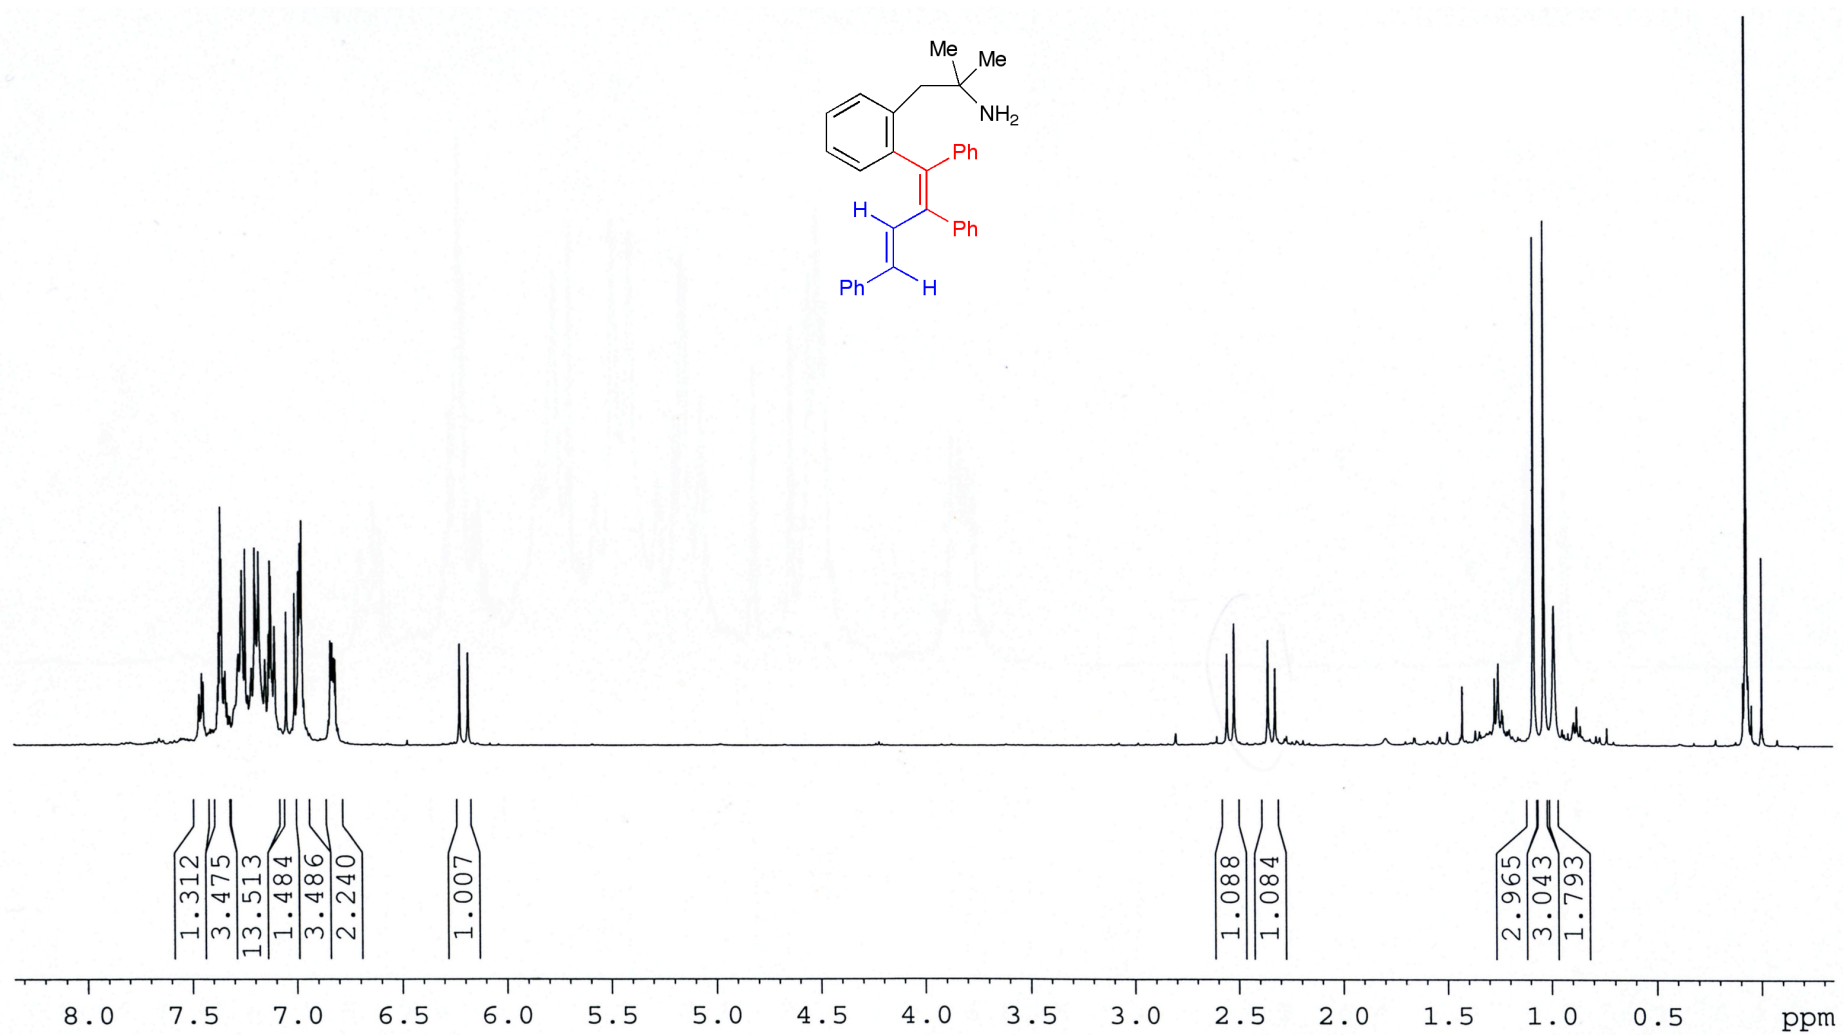

**Figure S48.** <sup>1</sup>H NMR spectrum of crude **4b** (400.9 MHz, CDCl<sub>3</sub>, 25 °C)

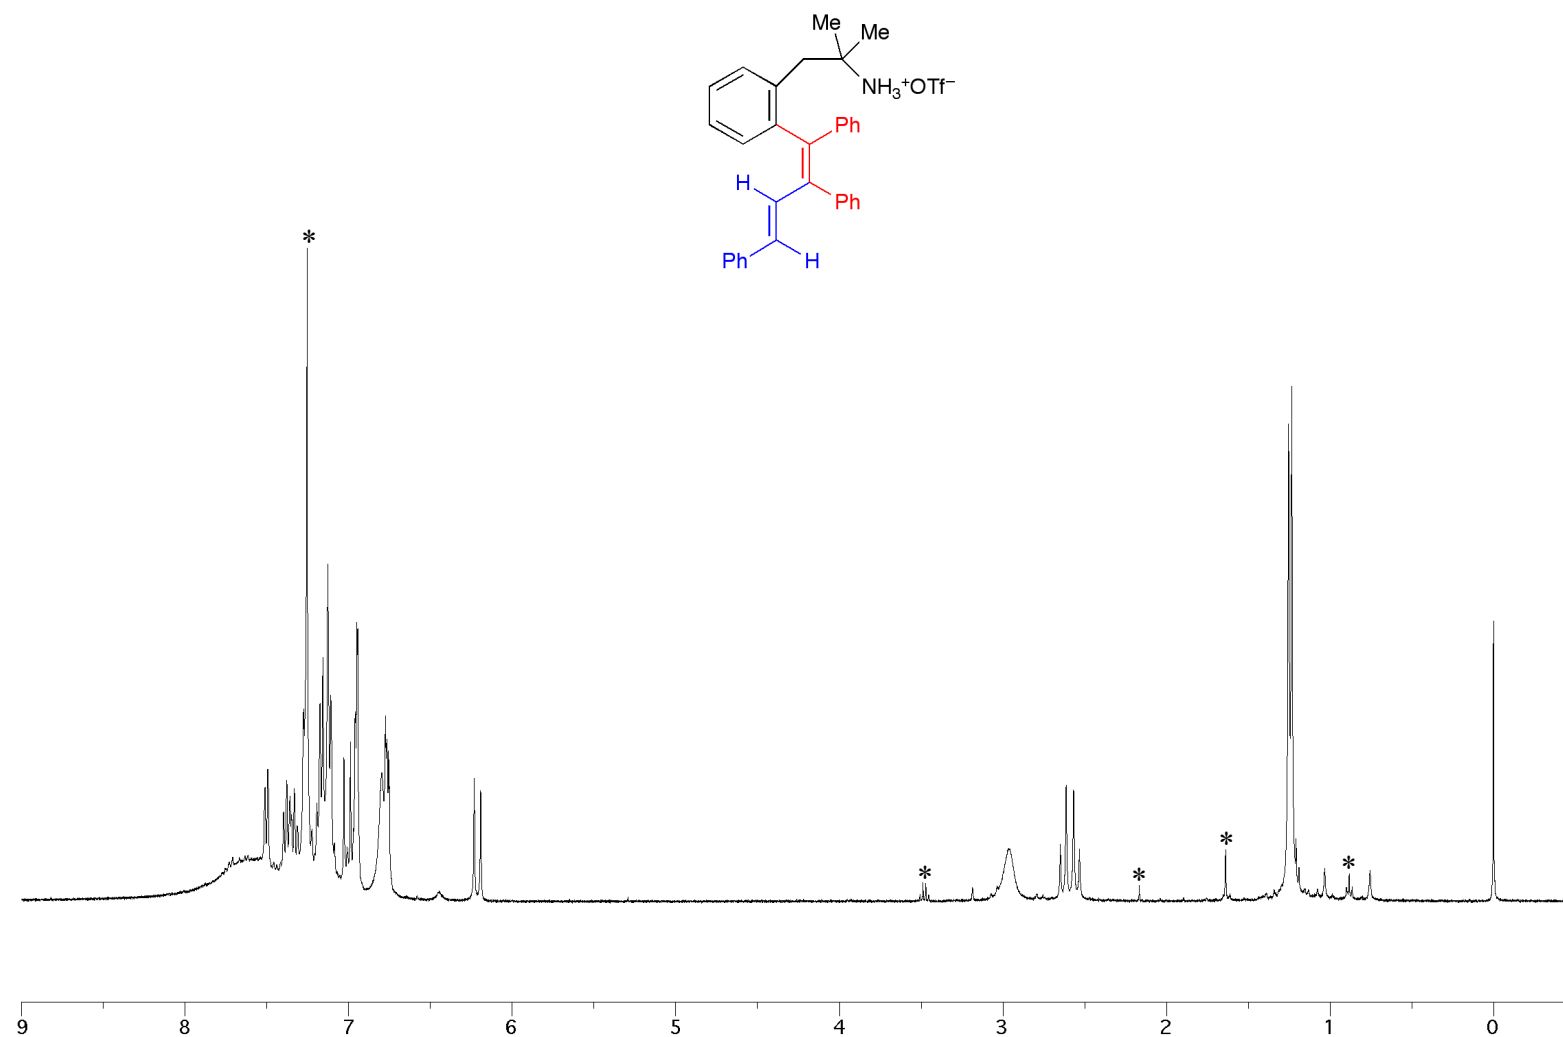

**Figure S49.** <sup>1</sup>H NMR spectrum of **5b**·H<sub>2</sub>O (400.9 MHz, CDCl<sub>3</sub>, 25 °C)

(From left to right, the asteriks indicate the signals corresponding to CHCl<sub>3</sub>, and traces of Et<sub>2</sub>O, acetone, H<sub>2</sub>O, and *n*-pentane)



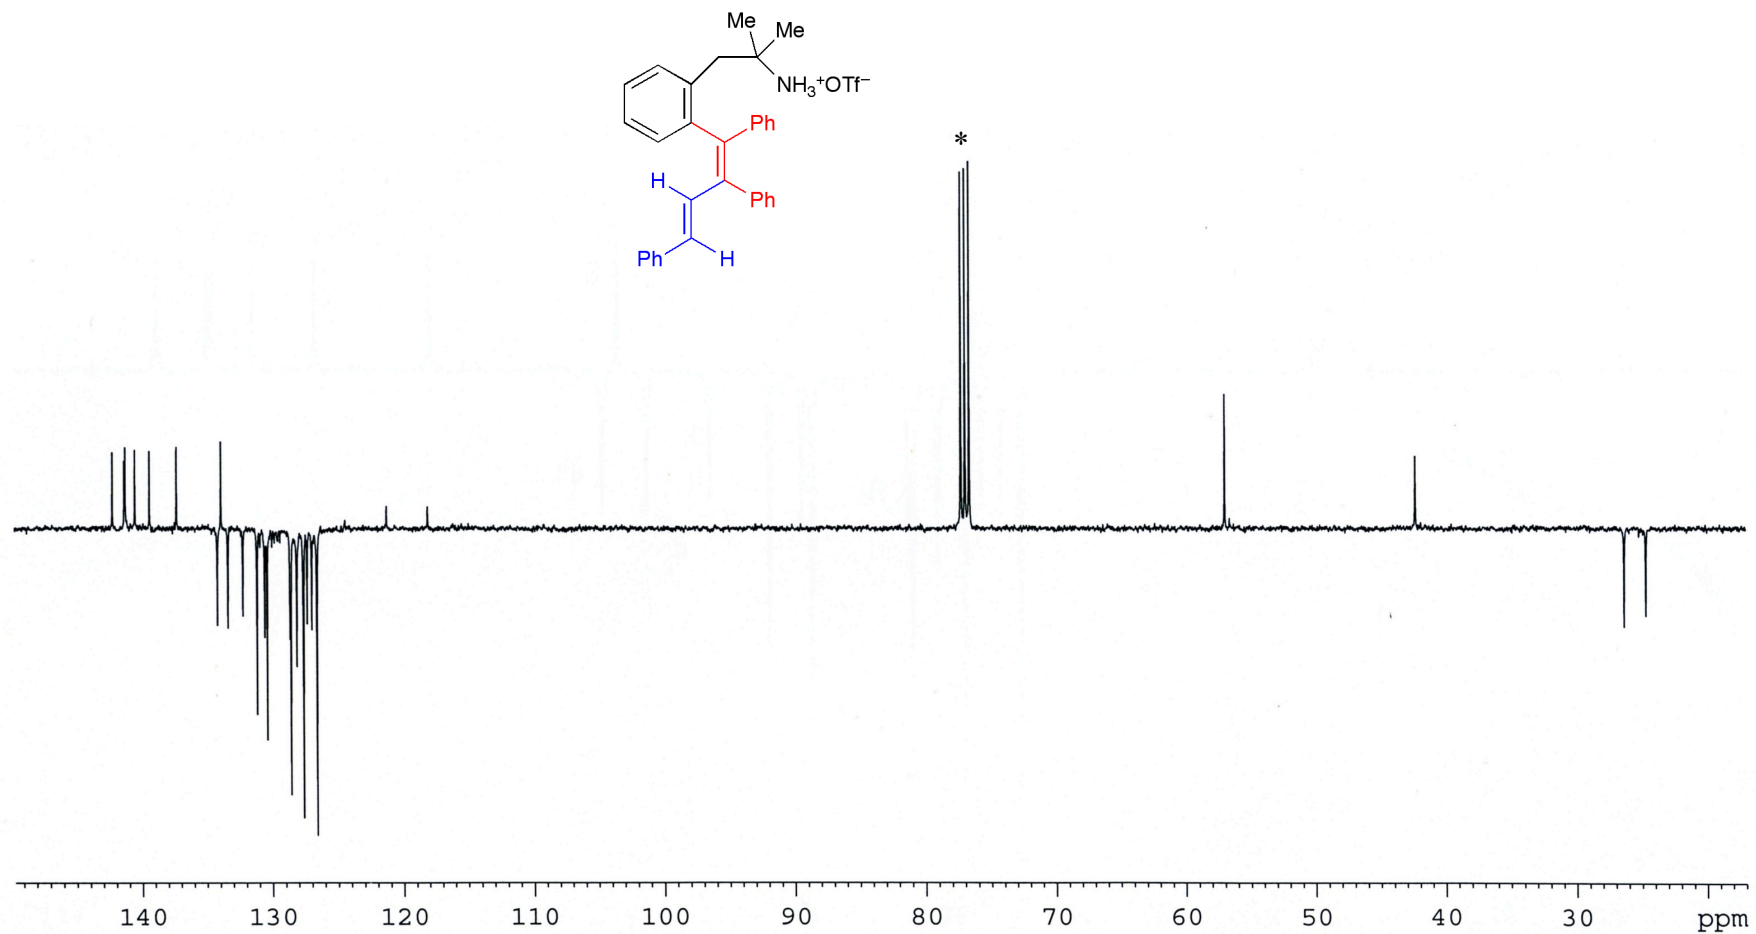

**Figure S50.**  $^{13}\text{C}\{^1\text{H}\}$  APT NMR spectrum of **5b**·H<sub>2</sub>O (100.8 MHz, CDCl<sub>3</sub>, 25 °C)  
(The asterik indicates the signal corresponding to CDCl<sub>3</sub>)

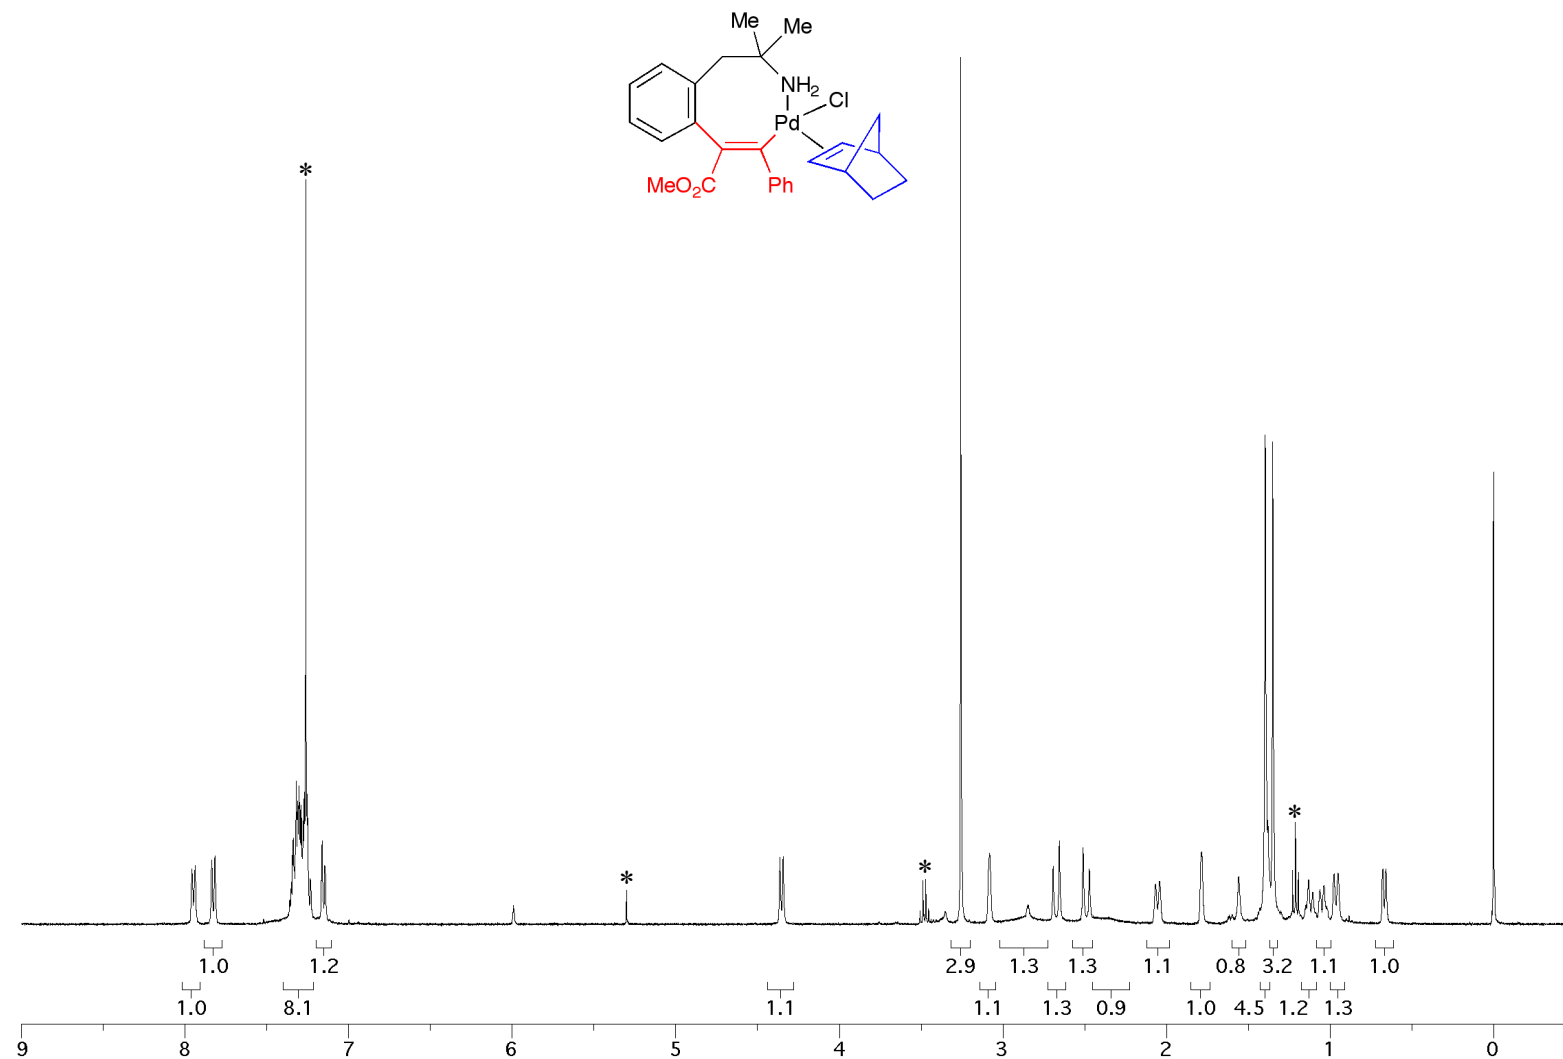

**Figure S51.** <sup>1</sup>H NMR spectrum of **6d** (400.9 MHz, CDCl<sub>3</sub>, 25 °C)

(From left to right, the asterisks indicate the signals corresponding to CHCl<sub>3</sub>, CH<sub>2</sub>Cl<sub>2</sub>, and Et<sub>2</sub>O)

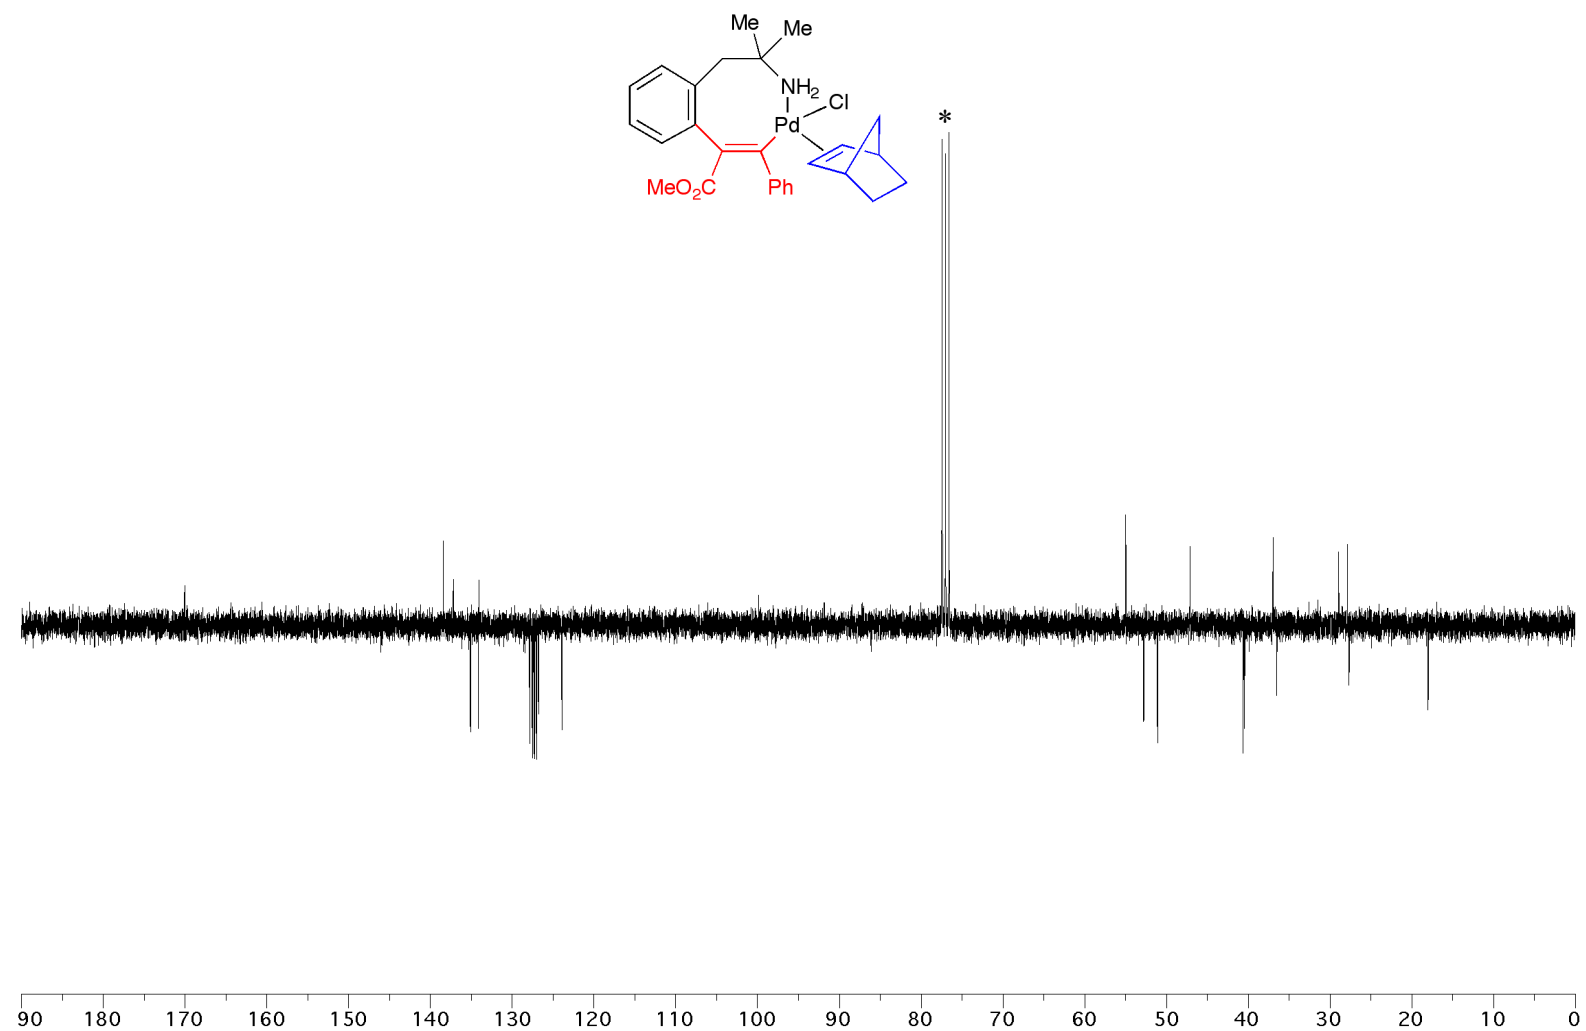

**Figure S52.**  $^{13}\text{C}\{^1\text{H}\}$  APT NMR spectrum of **6d** (75.5 MHz,  $\text{CDCl}_3$ , 25 °C)  
(The asterik indicates the signal corresponding to  $\text{CDCl}_3$ )

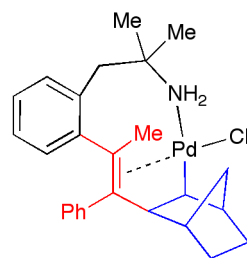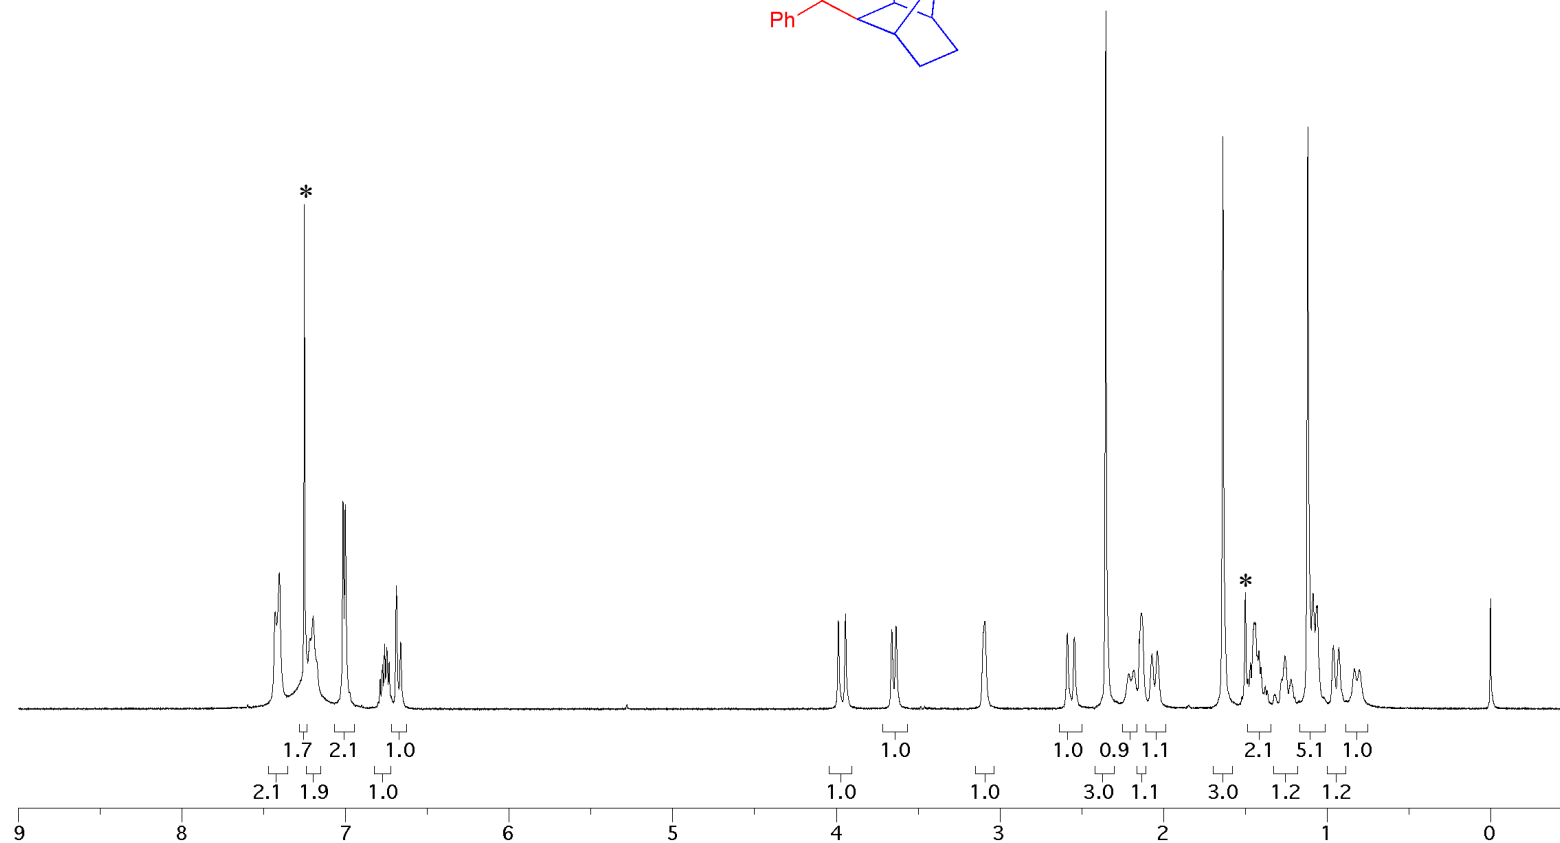

**Figure S53.**  $^1\text{H}$  NMR spectrum of **7c**· $\text{CHCl}_3$  (300.1 MHz,  $\text{CDCl}_3$ , 25 °C)  
(From left to right, the asteriks indicate the signals corresponding to  $\text{CHCl}_3$ , and  $\text{H}_2\text{O}$ )

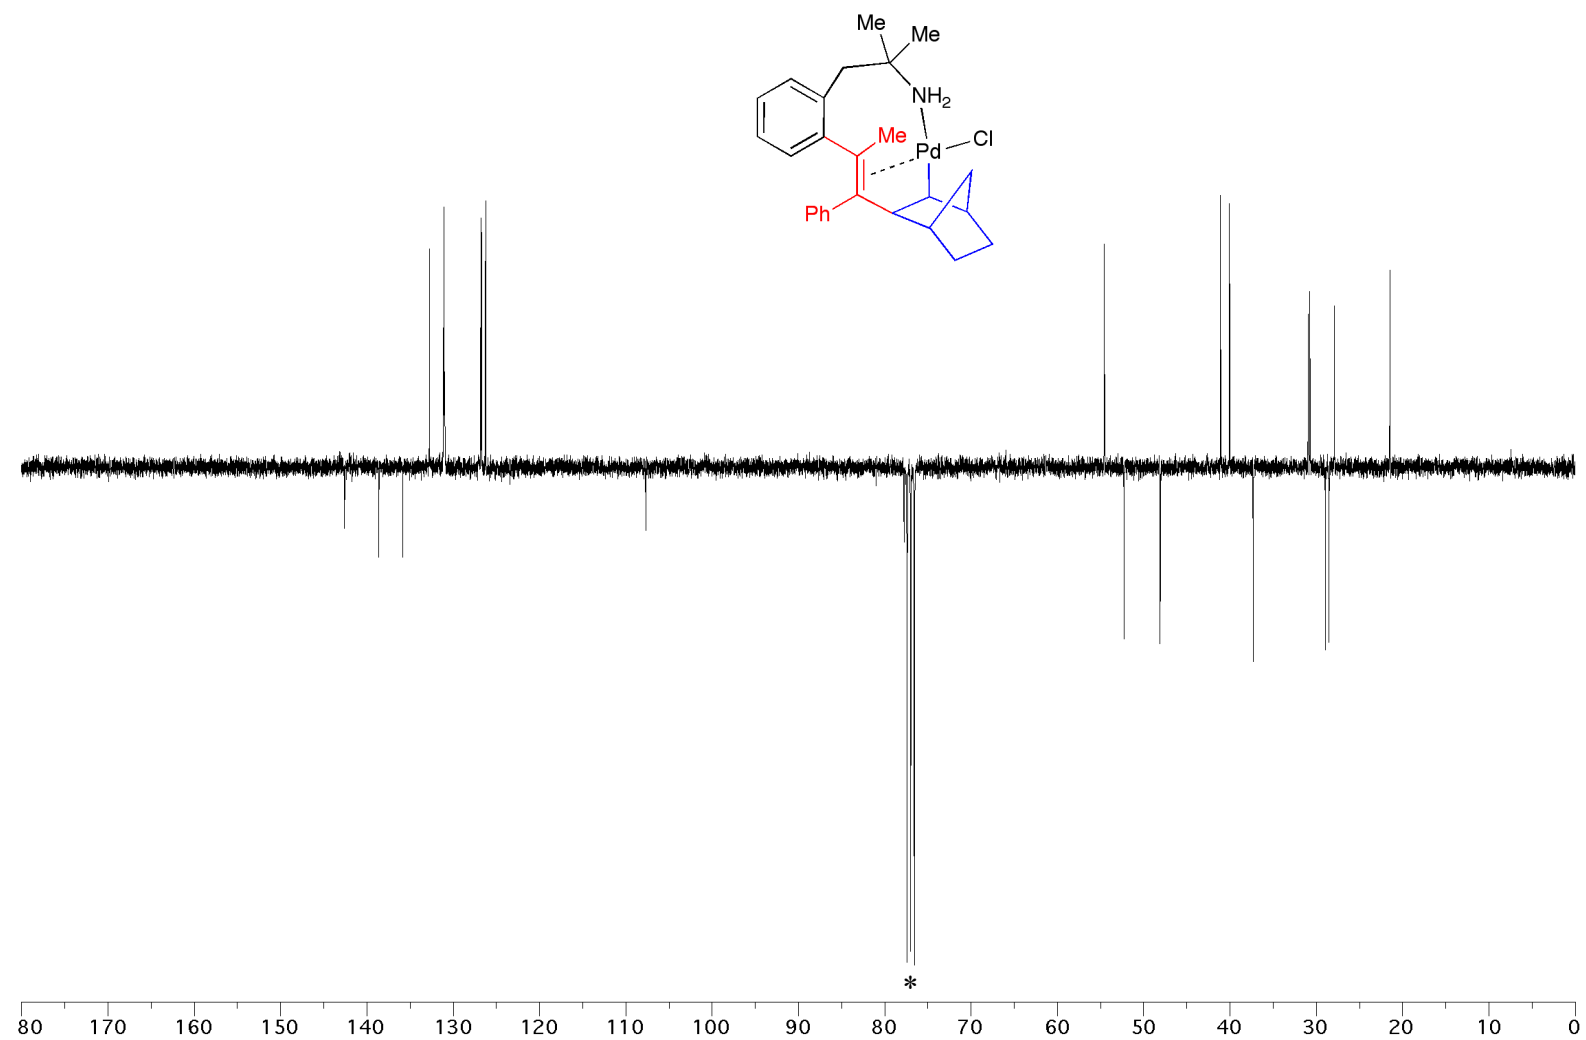

**Figure S54.**  $^{13}\text{C}\{^1\text{H}\}$  APT NMR spectrum of **7c**· $\text{CHCl}_3$  (75.5 MHz,  $\text{CDCl}_3$ , 25 °C)  
(The asterik indicates the signal corresponding to  $\text{CDCl}_3$ )

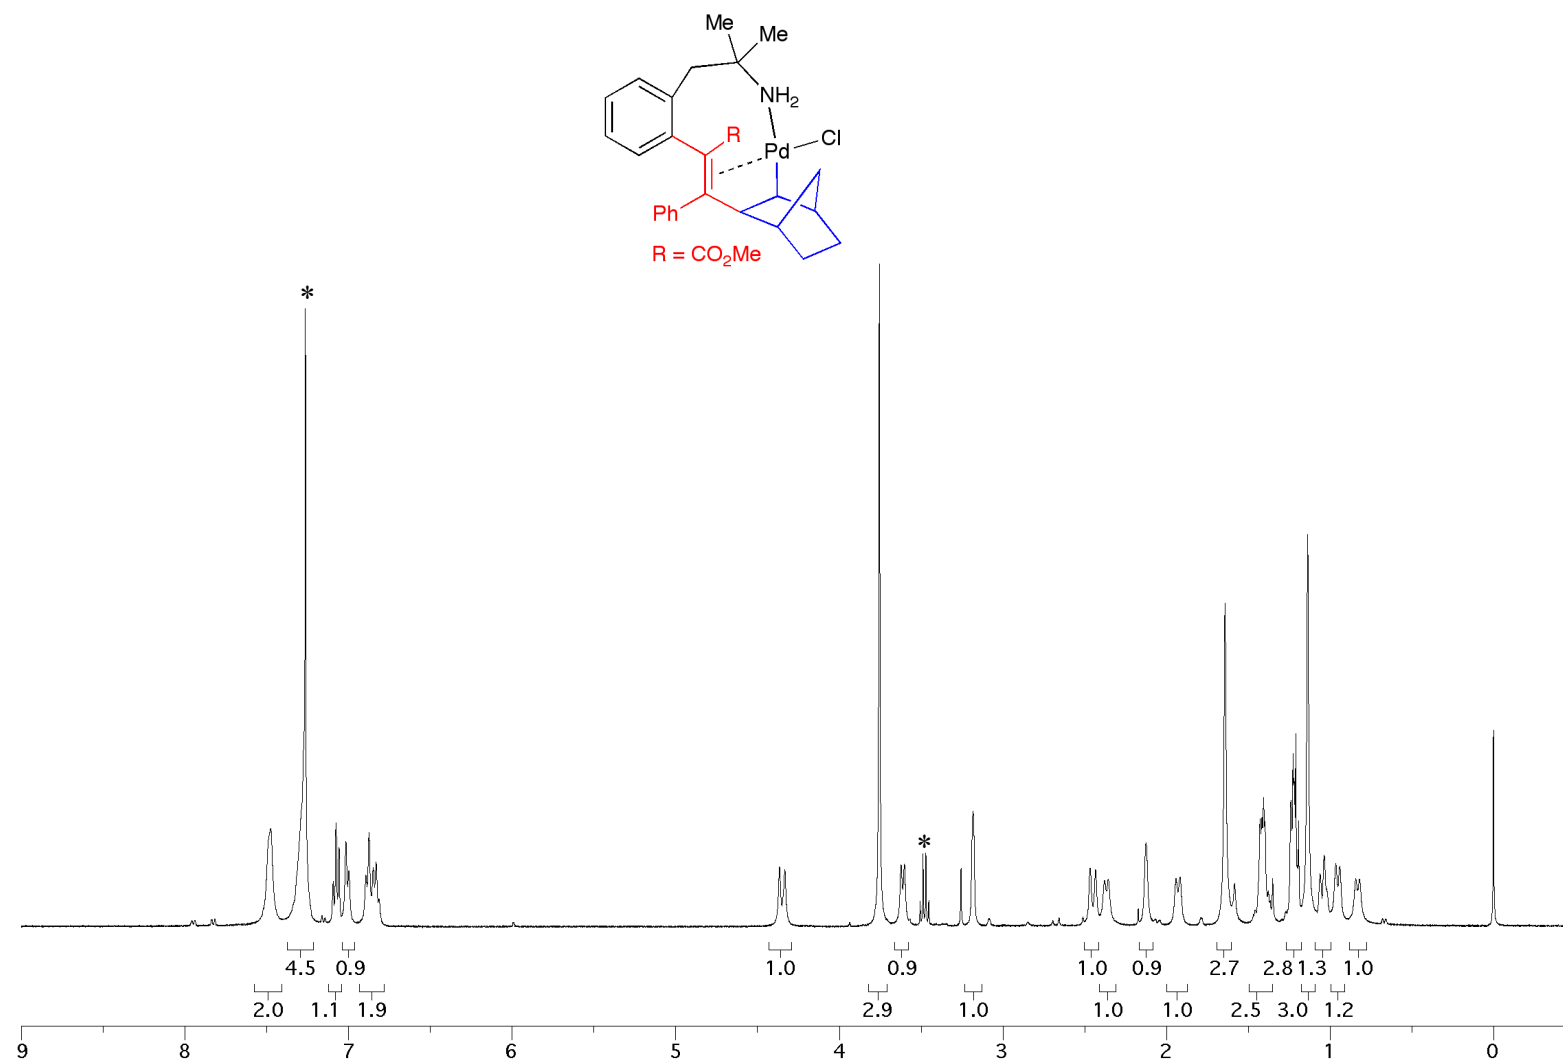

**Figure S55.** <sup>1</sup>H NMR spectrum of **7d**·1/2CHCl<sub>3</sub> (400.9 MHz, CDCl<sub>3</sub>, 25 °C)  
 (From left to right, the asteriks indicate the signals corresponding to CHCl<sub>3</sub>, and Et<sub>2</sub>O)

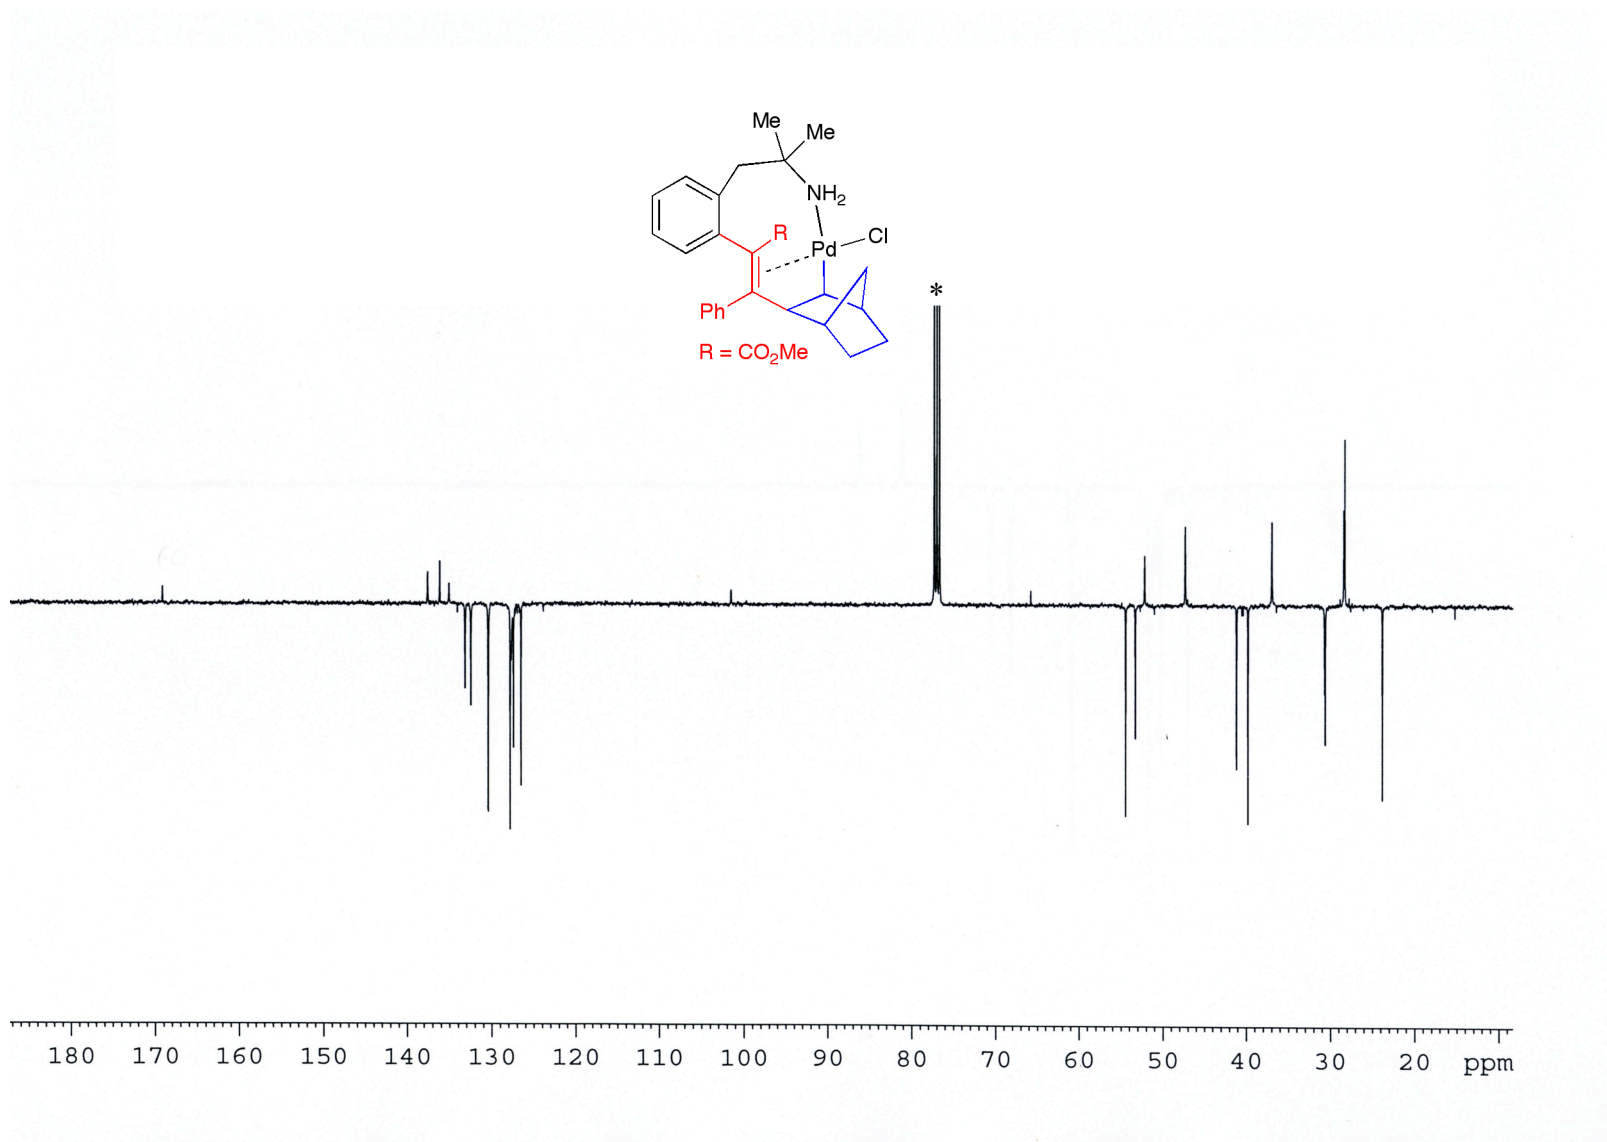

**Figure S56.**  $^{13}\text{C}\{^1\text{H}\}$  APT NMR spectrum of **7d**·1/2 $\text{CHCl}_3$  (100.8 MHz,  $\text{CDCl}_3$ , 25 °C)  
(The asterik indicates the signal corresponding to  $\text{CDCl}_3$ )

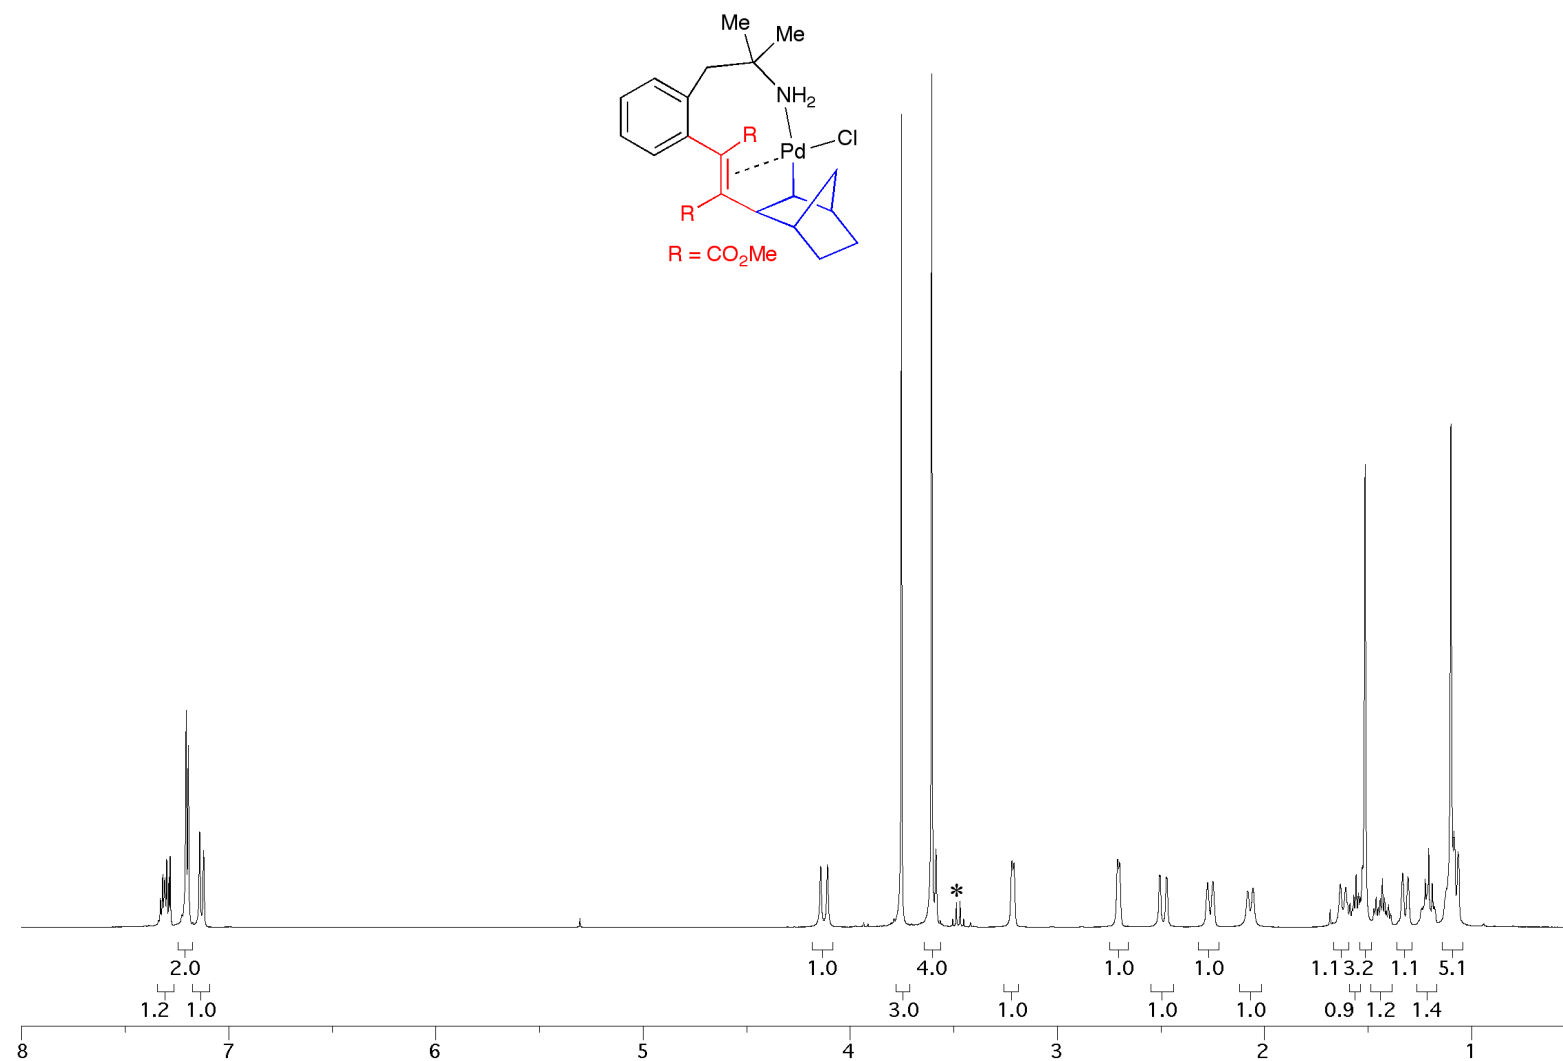

**Figure S57.** <sup>1</sup>H NMR spectrum of **7f** (400.9 MHz, CDCl<sub>3</sub>, 25 °C)  
 (The asterik indicates the signal corresponding to traces of Et<sub>2</sub>O)



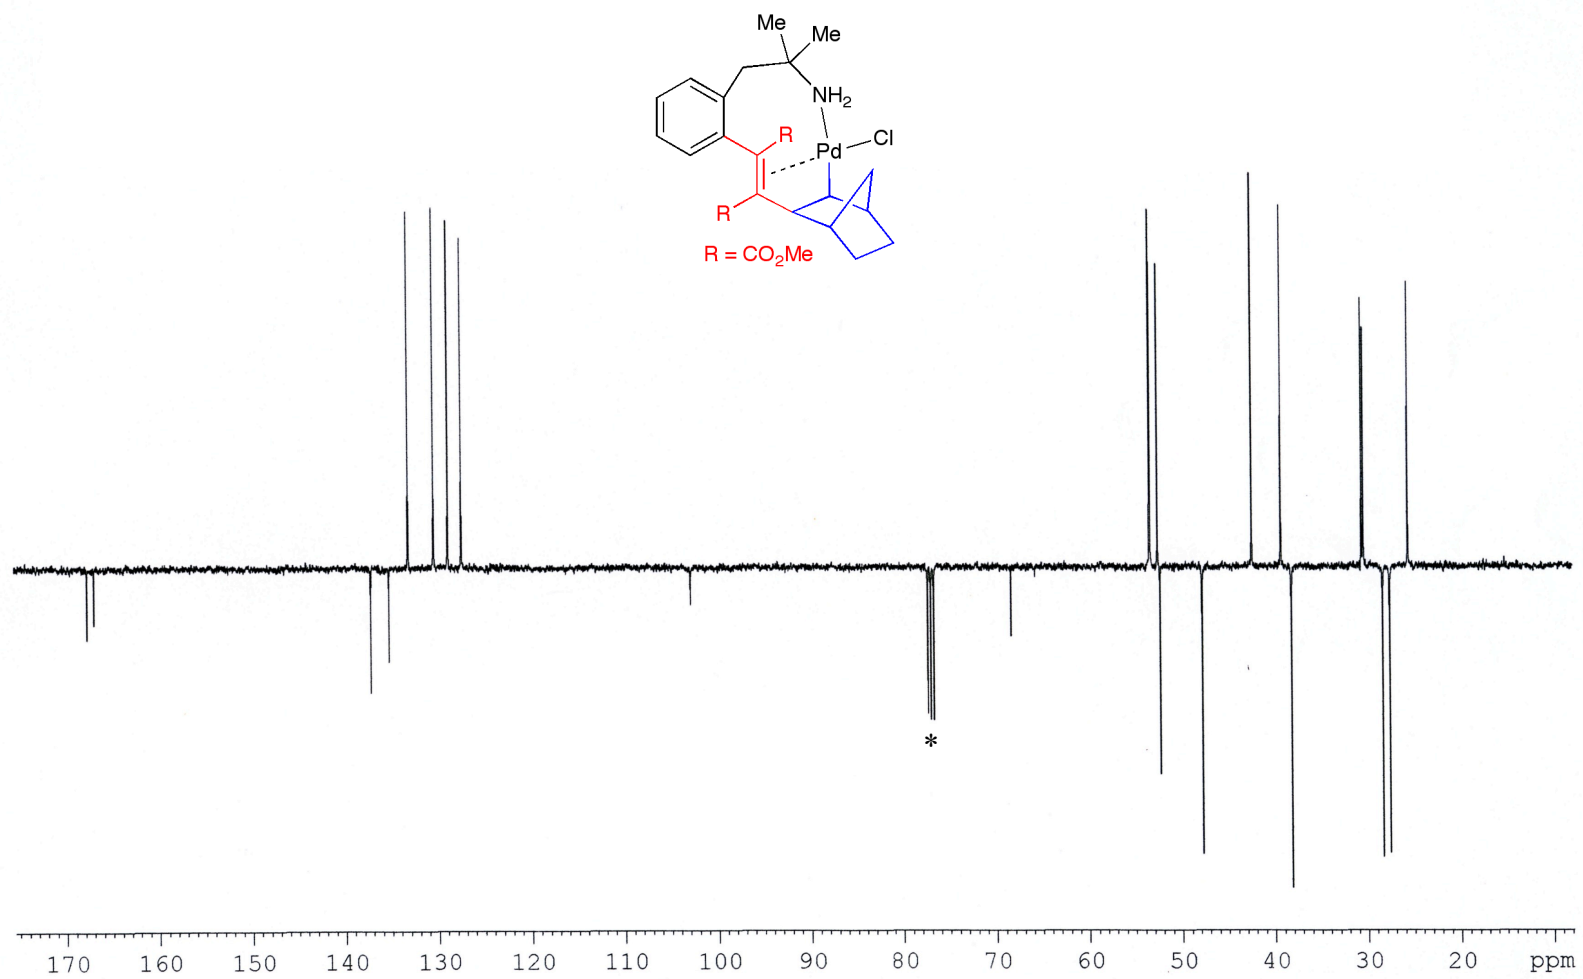

**Figure S58.**  $^{13}\text{C}\{^1\text{H}\}$  APT NMR spectrum of **7f** (100.8 MHz,  $\text{CDCl}_3$ , 25 °C)  
(The asterik indicates the signal corresponding to  $\text{CDCl}_3$ )

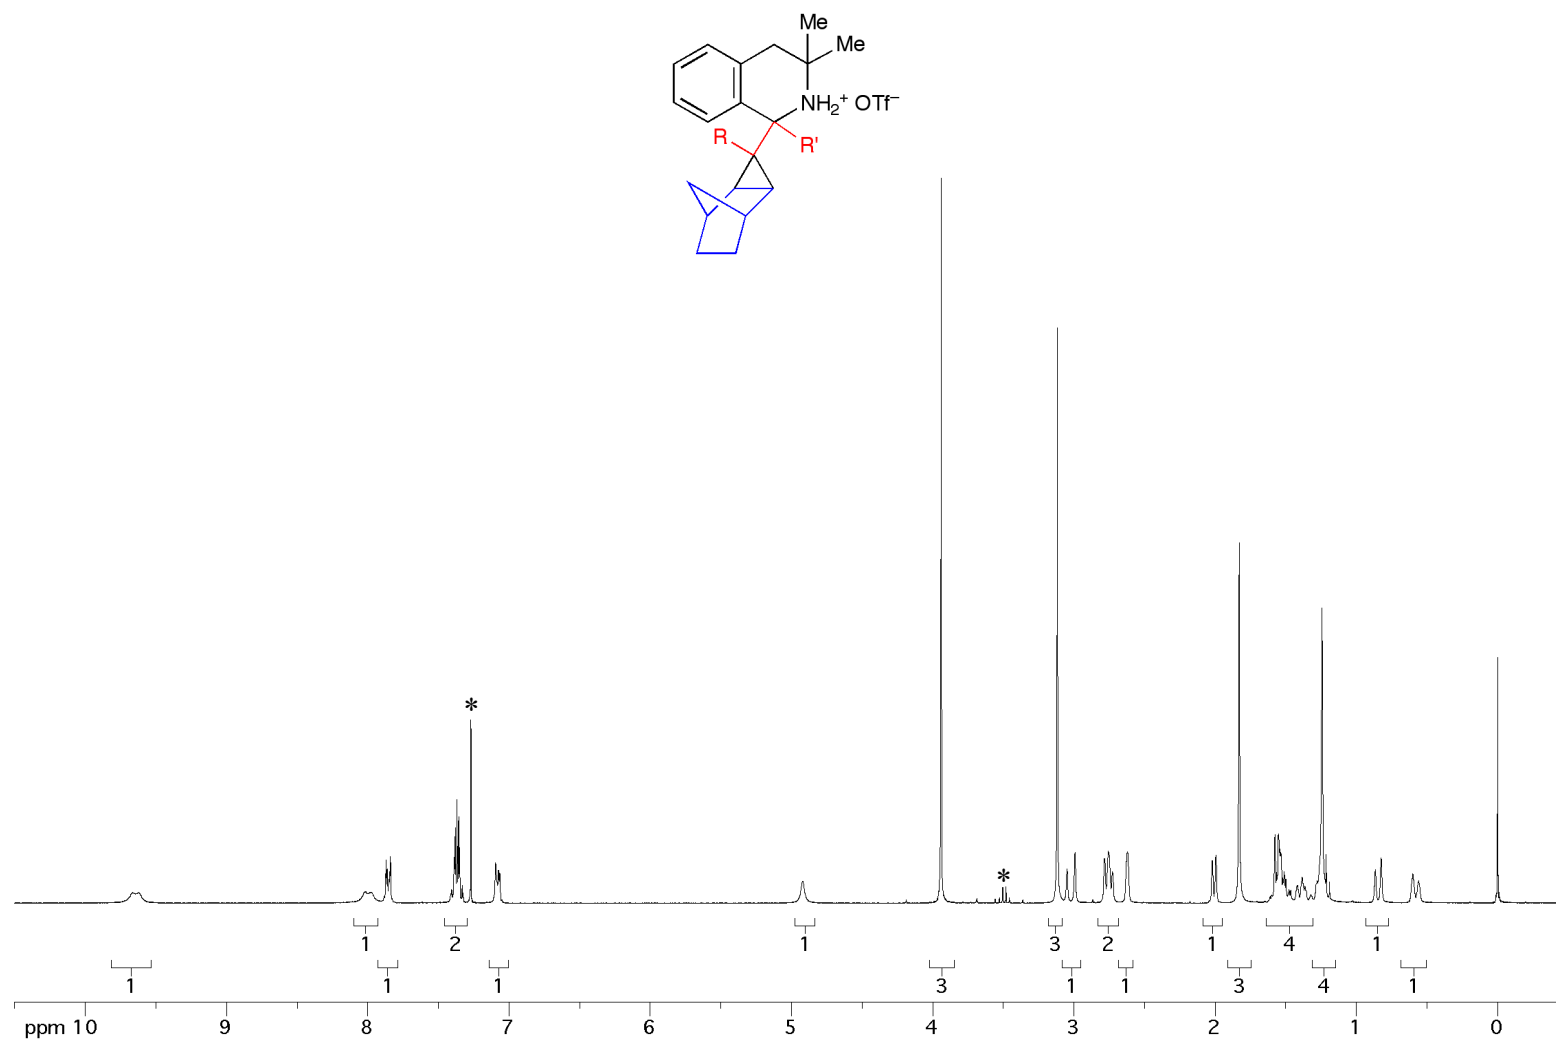

**Figure S59.** <sup>1</sup>H NMR spectrum of **8f** (300.1 MHz, CDCl<sub>3</sub>, 25 °C)

(From left to right, the asteriks indicate the signals corresponding to CHCl<sub>3</sub> and traces of Et<sub>2</sub>O)

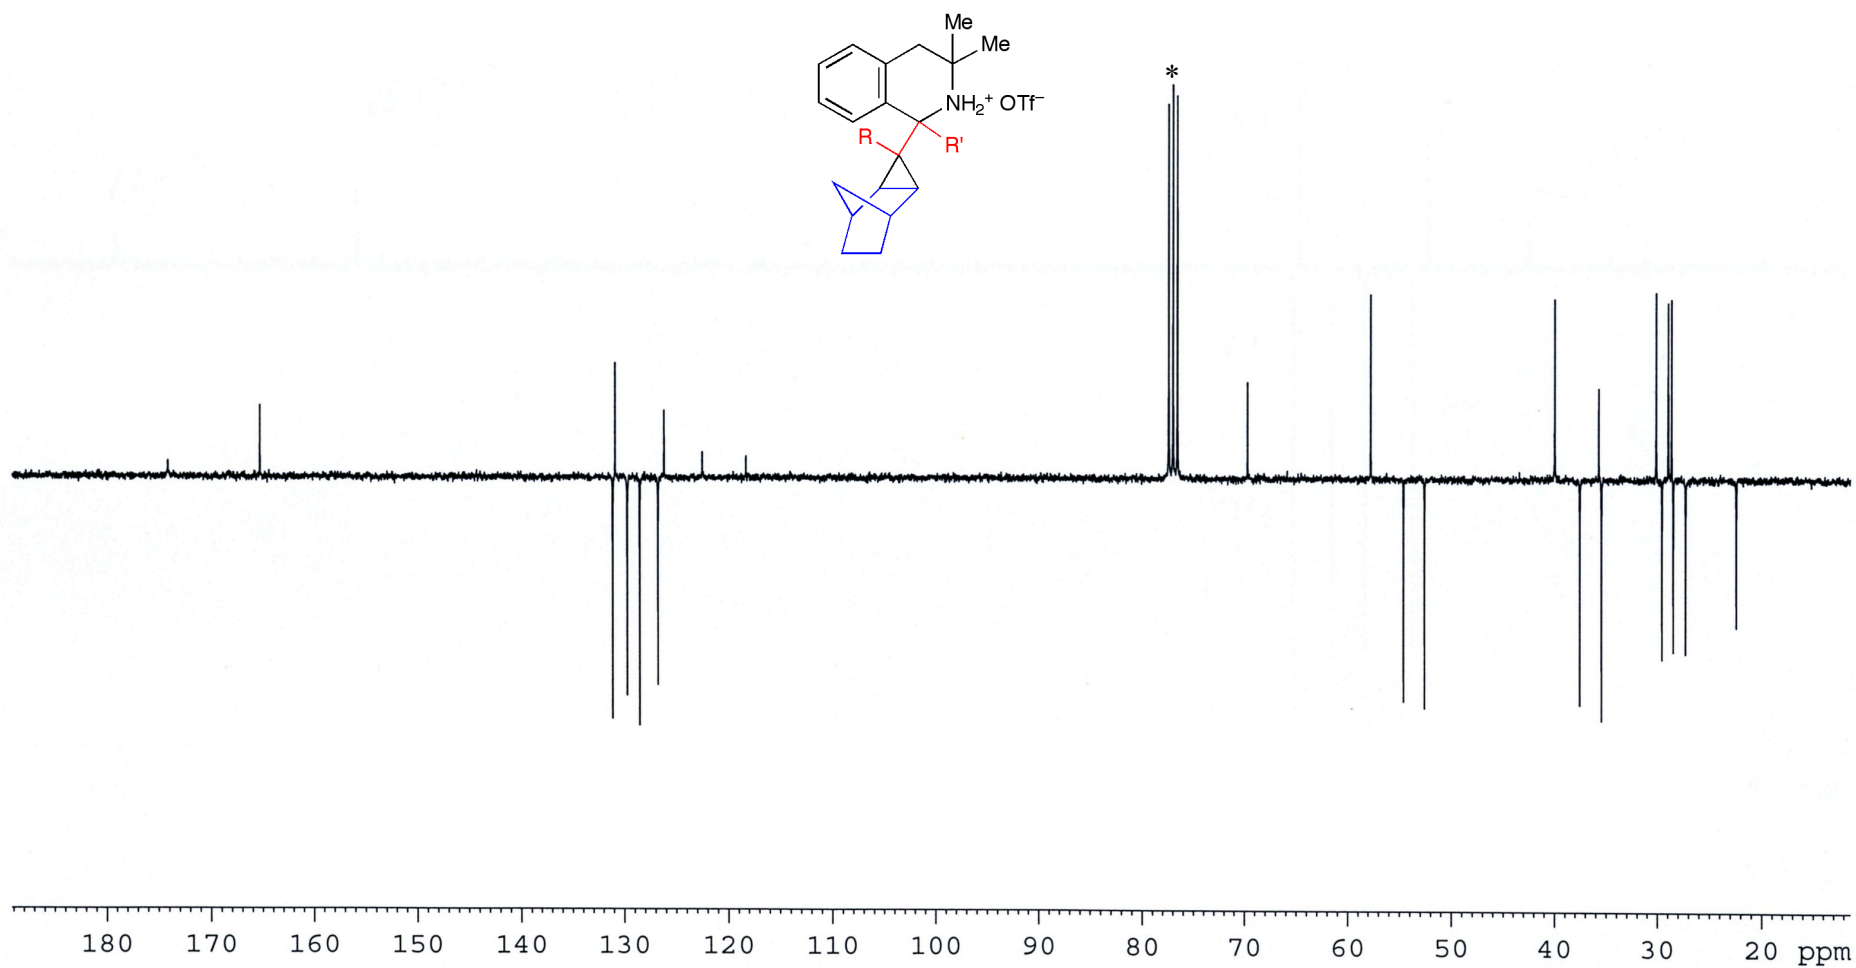

**Figure S60.**  $^{13}\text{C}\{^1\text{H}\}$  APT NMR spectrum of **8f** (75.5 MHz,  $\text{CDCl}_3$ , 25 °C)

(The asterik indicates the signal corresponding to  $\text{CDCl}_3$ )

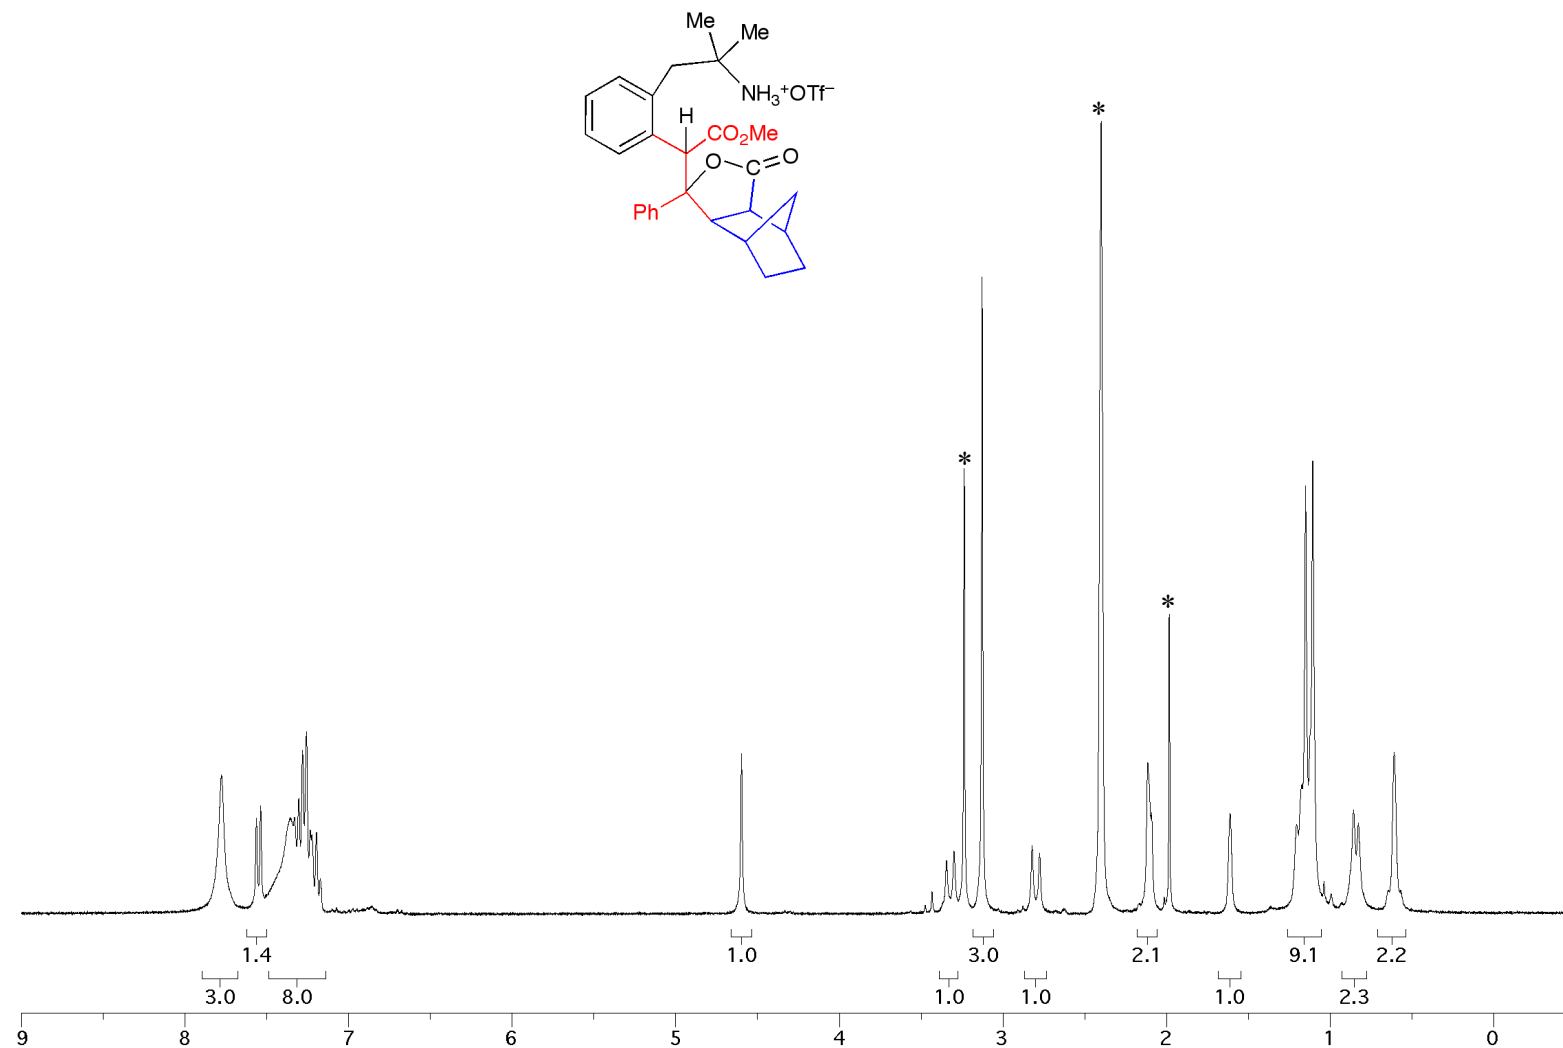

**Figure S61.** <sup>1</sup>H NMR spectrum of **9d** (300.1 MHz, DMSO-*d*<sub>6</sub>, 25 °C)

(From left to right, the asteriks indicate the signals corresponding to H<sub>2</sub>O, deuterated DMSO, and acetone)

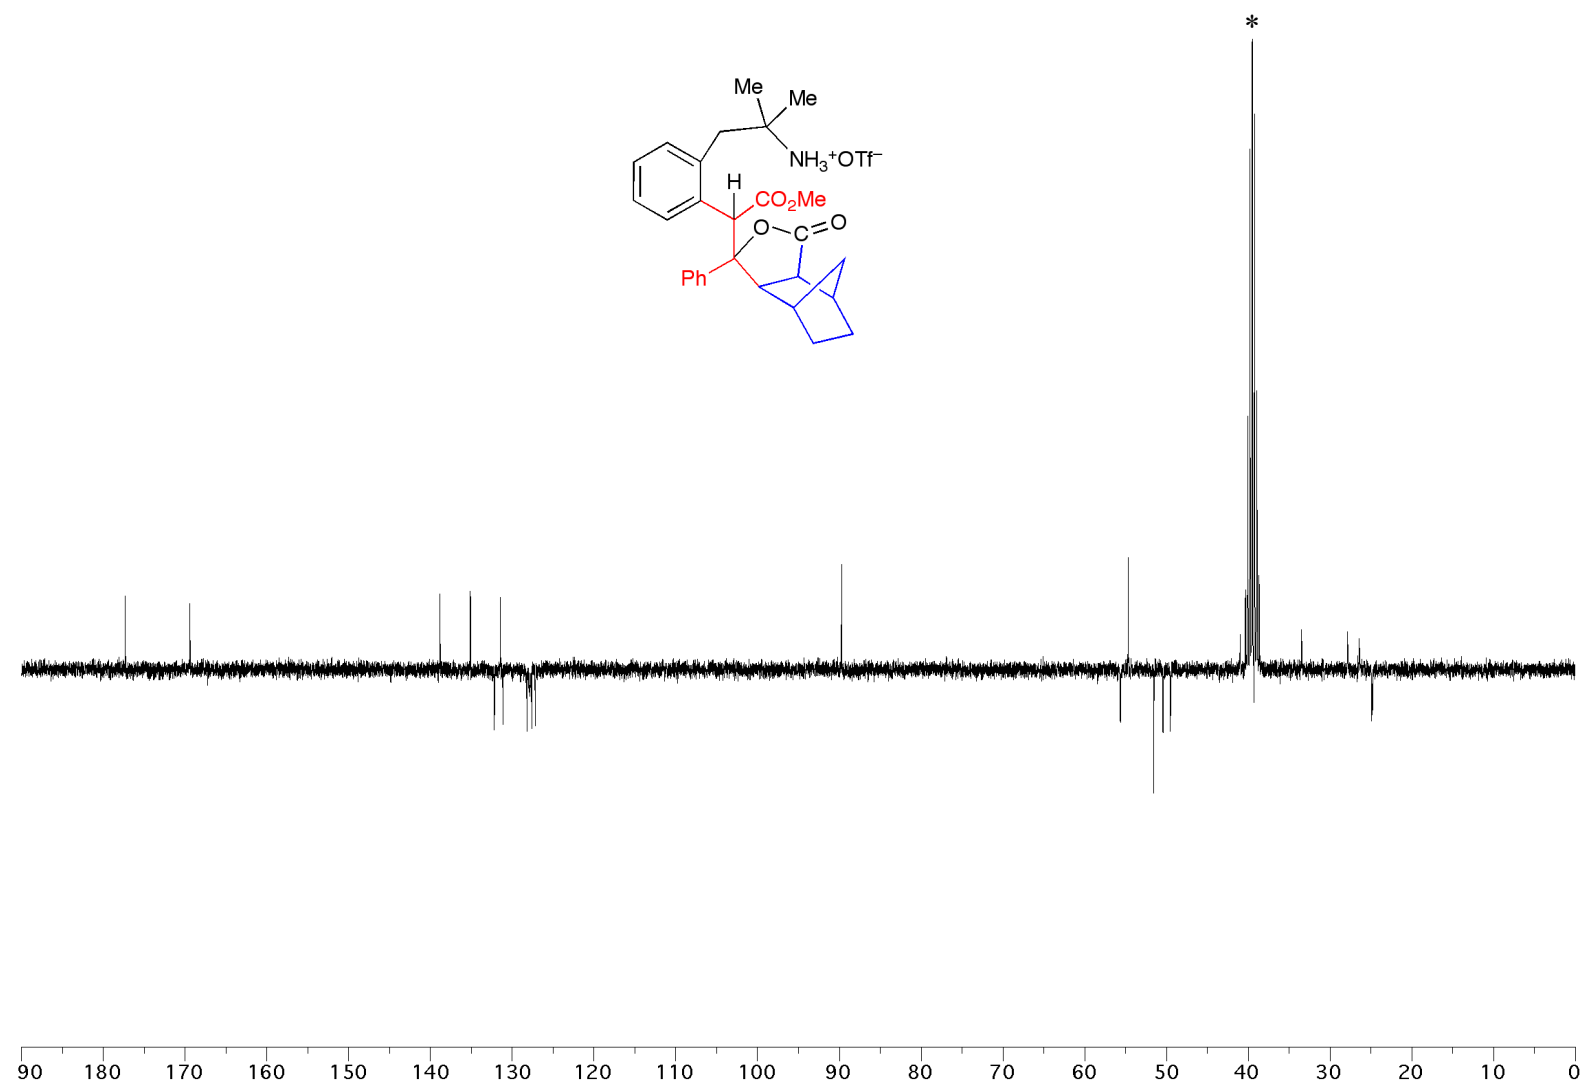

**Figure S62.**  $^{13}\text{C}\{^1\text{H}\}$  APT NMR spectrum of **9d** (75.5 MHz, DMSO- $d_6$ , 25 °C)

(The asterik indicates the signal corresponding to DMSO- $d_6$ )

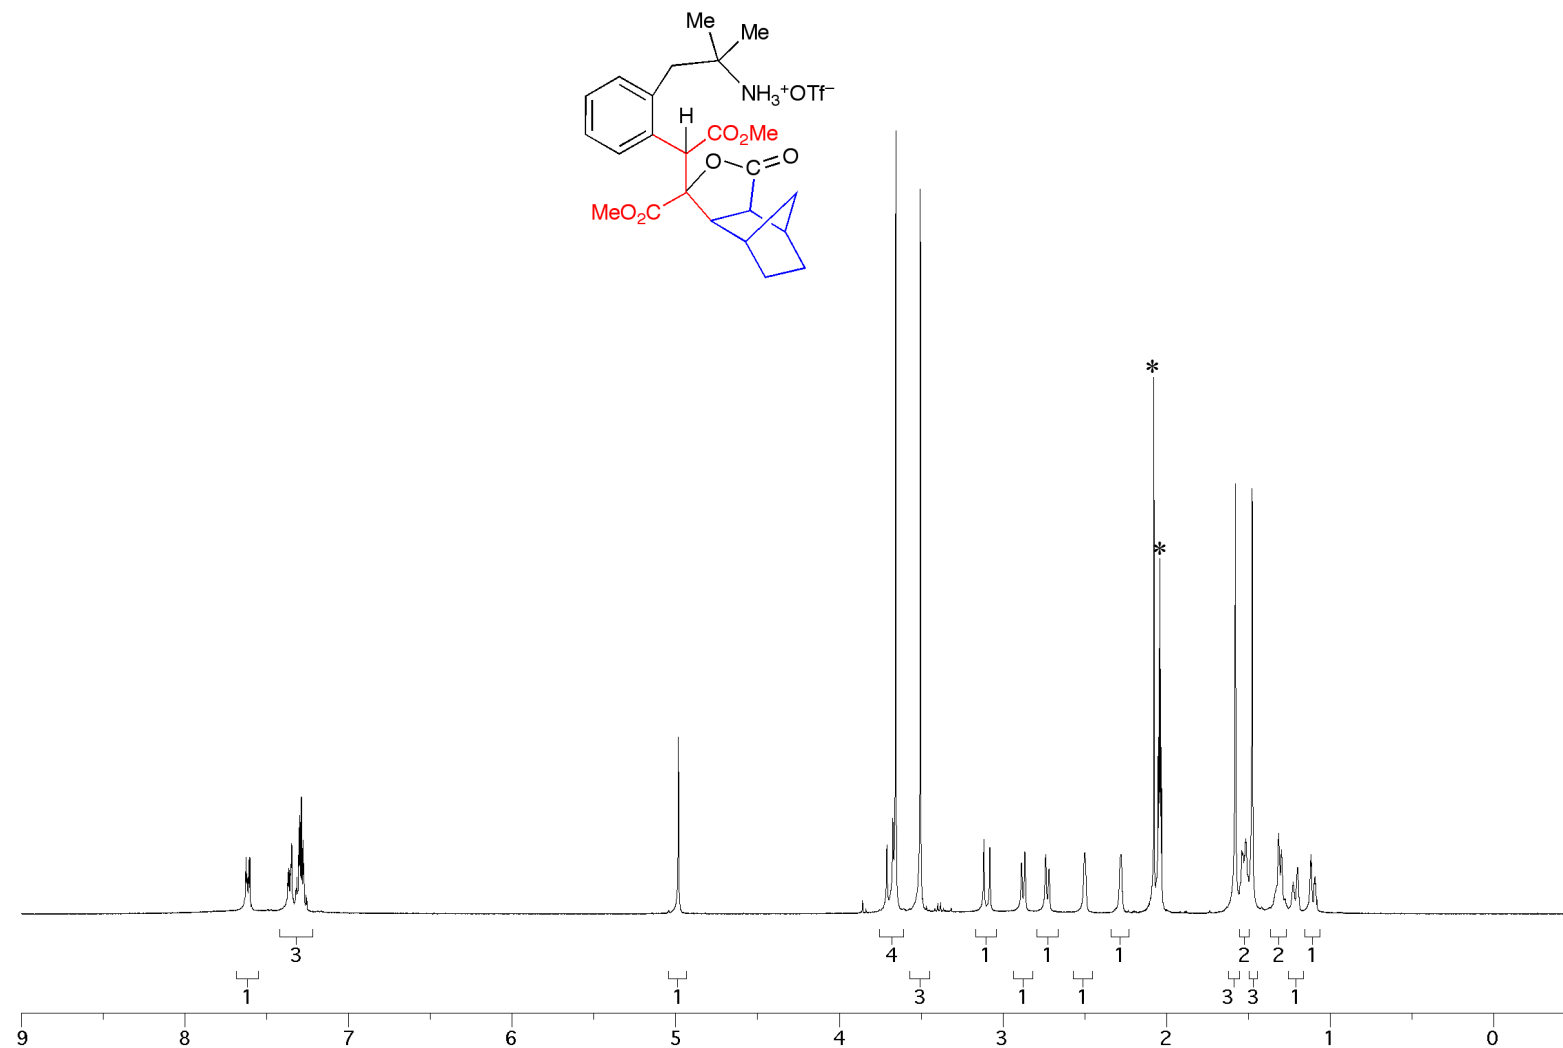

**Figure S63.** <sup>1</sup>H NMR spectrum of **9f** (400.9 MHz, acetone-*d*<sub>6</sub>, 25 °C)  
 (From left to right, the asteriks indicate the signals corresponding to deuterated acetone, and acetone)

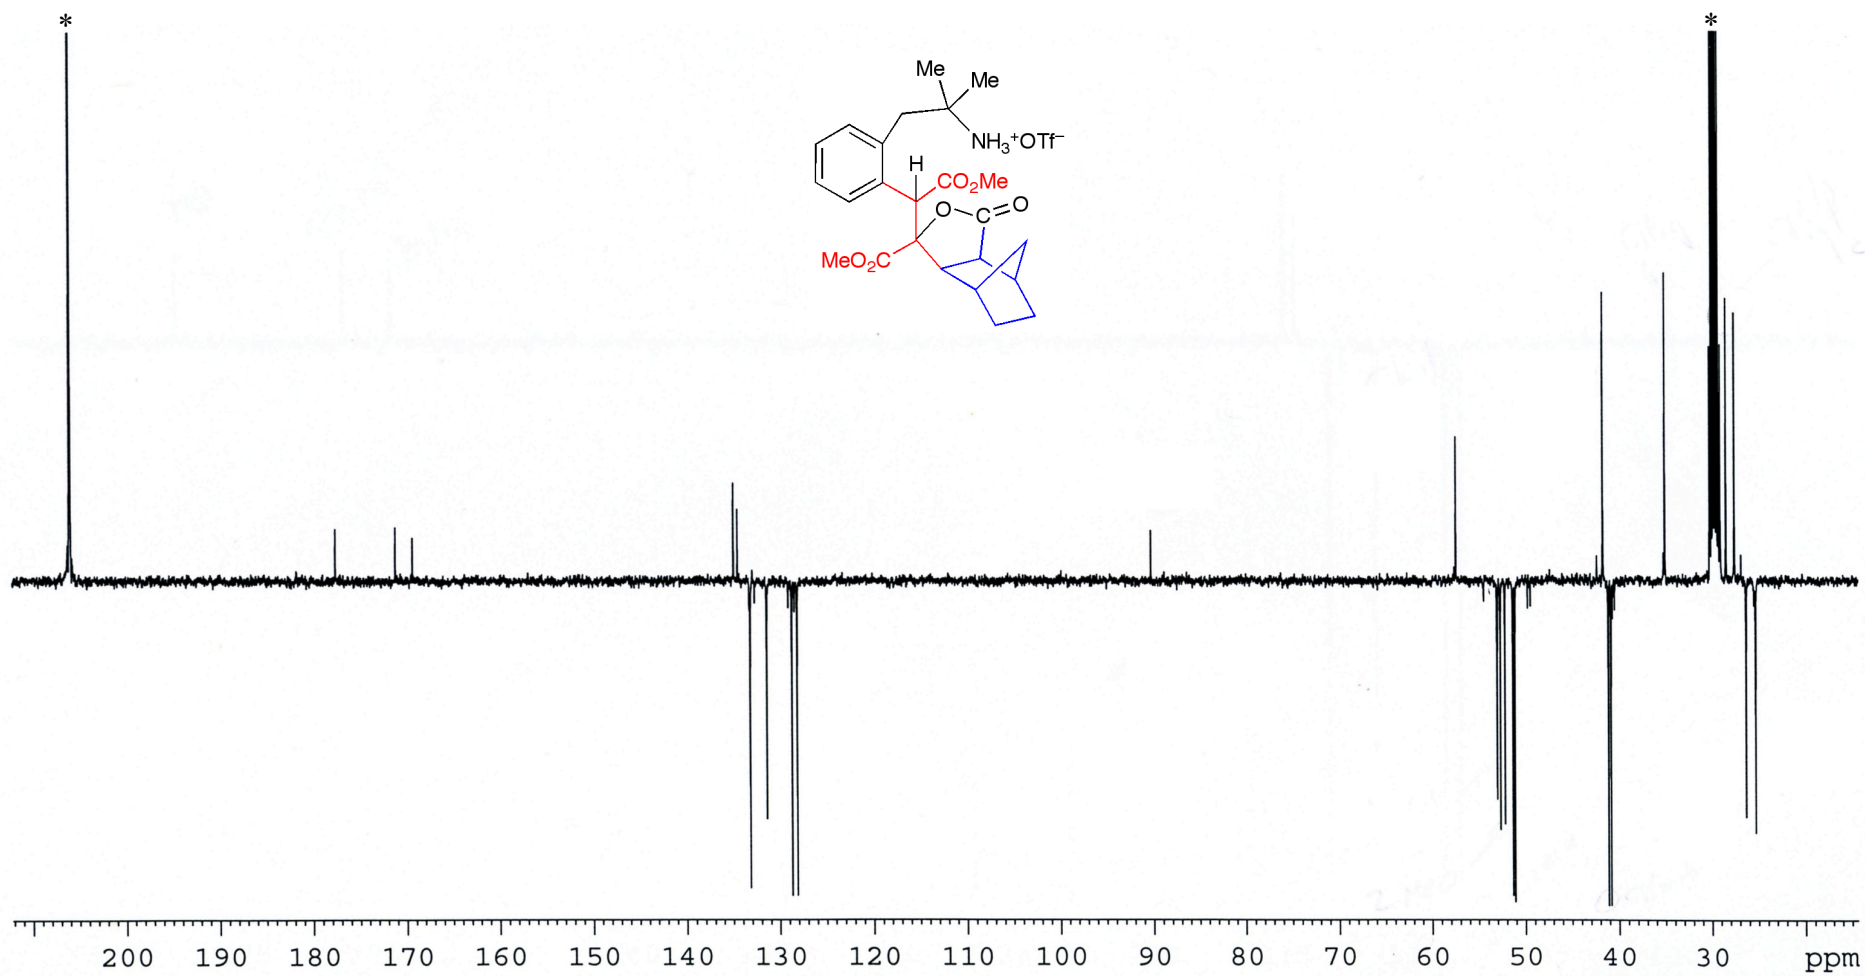

**Figure S64.**  $^{13}\text{C}\{^1\text{H}\}$  APT NMR spectrum of **9f** (100.8 MHz, acetone- $d_6$ , 25 °C)

(The asteriks indicate the signals corresponding to acetone- $d_6$ )

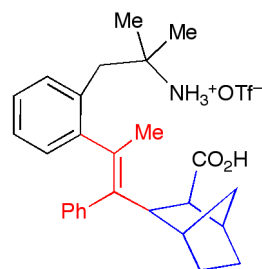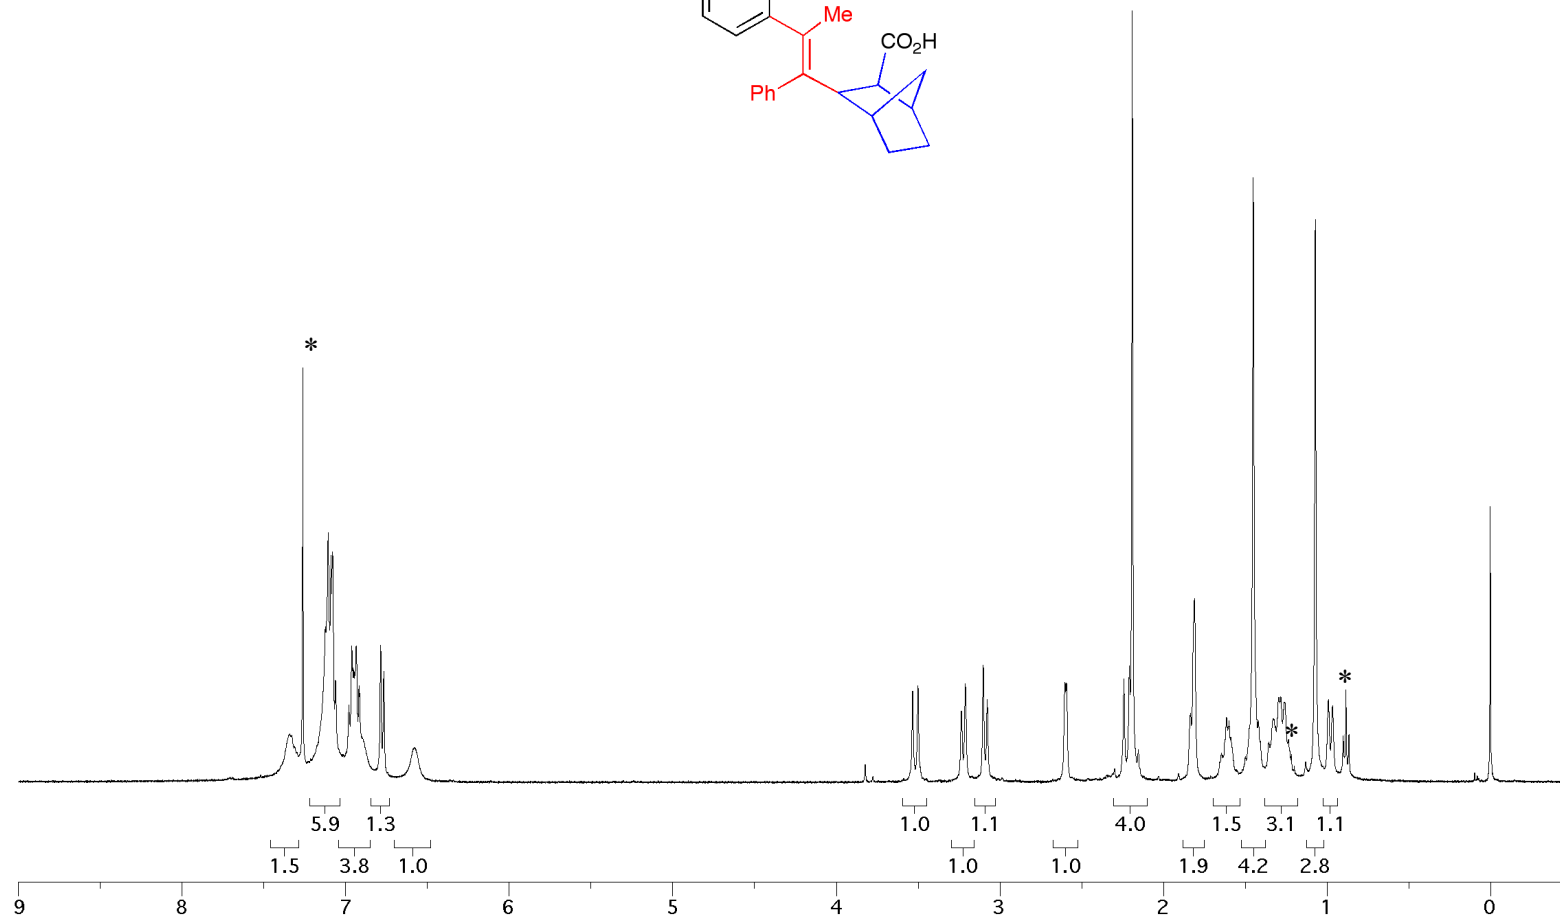

**Figure S65.**  $^1\text{H}$  NMR spectrum of **10c** (400.9 MHz,  $\text{CDCl}_3$ , 25  $^\circ\text{C}$ )

(From left to right, the asteriks indicate the signals corresponding to  $\text{CDCl}_3$ , and traces of *n*-pentane)



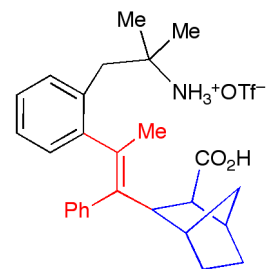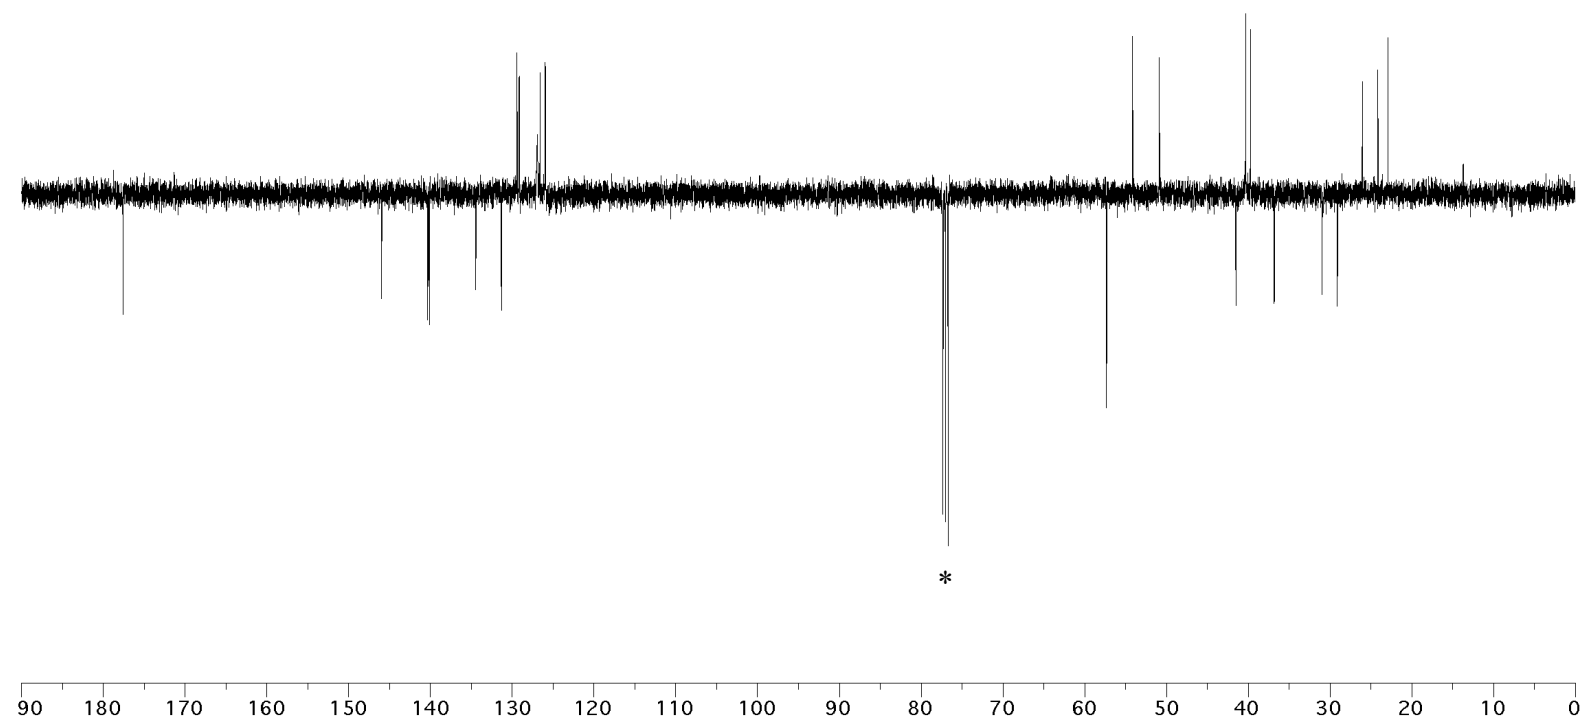

**Figure S66.** <sup>13</sup>C{<sup>1</sup>H} APT NMR spectrum of **10c** (100.8 MHz, CDCl<sub>3</sub>, 25 °C)  
(The asterik indicates the signal corresponding to CDCl<sub>3</sub>)

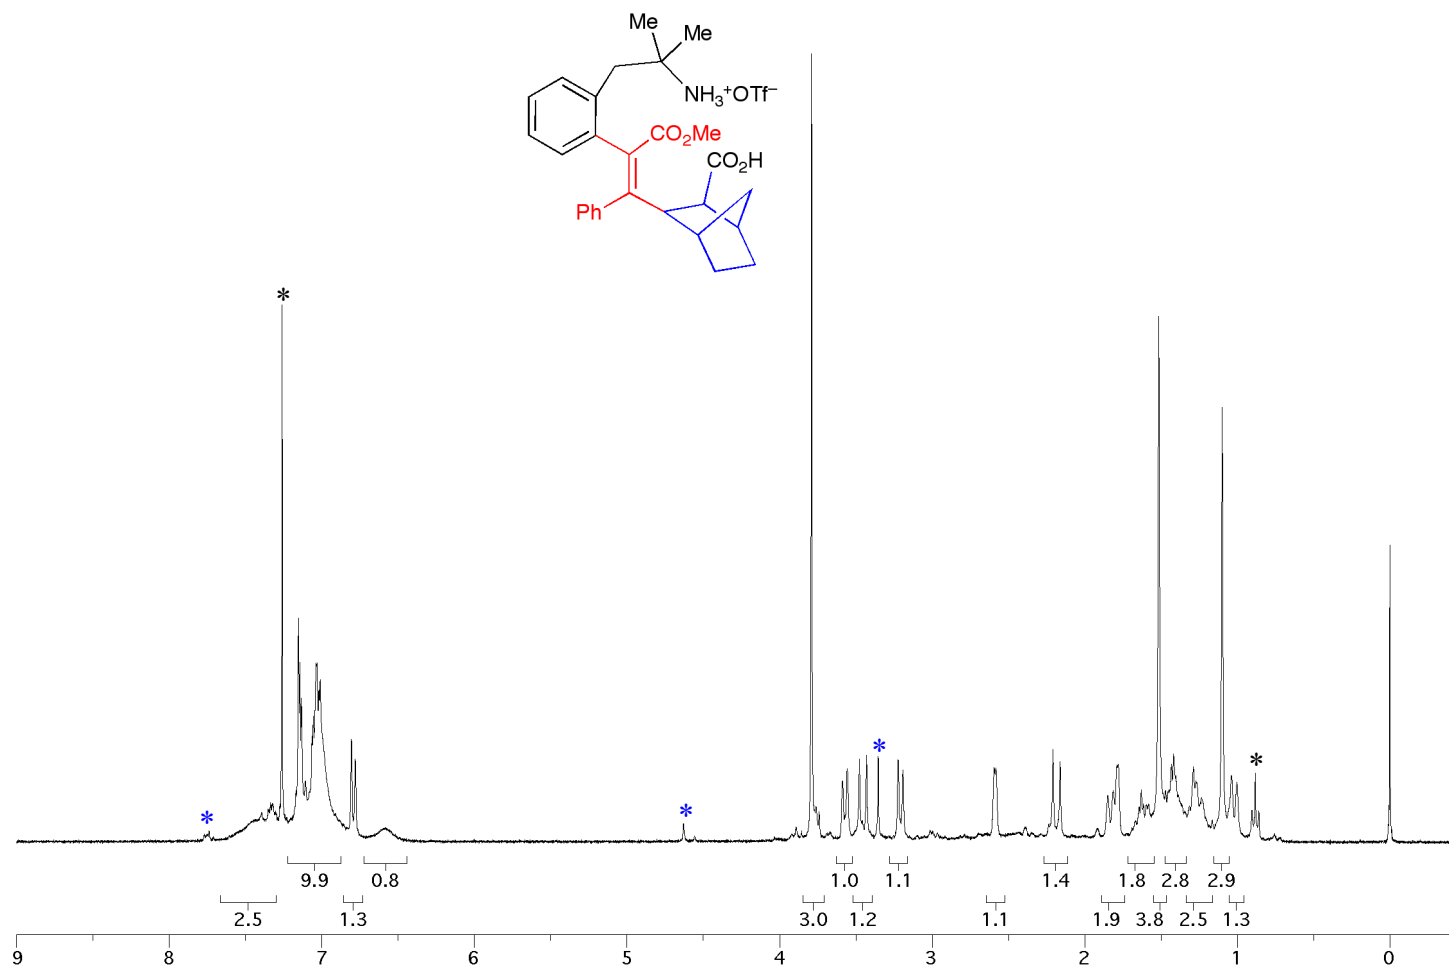

**Figure S67.**  $^1\text{H}$  NMR spectrum of **10d** (300.1 MHz,  $\text{CDCl}_3$ , 25  $^\circ\text{C}$ )

(From left to right, the black asteriks indicate the signals corresponding to  $\text{CDCl}_3$ , and traces of *n*-pentane. The blue asteriks correspond to traces of compound **9d**)

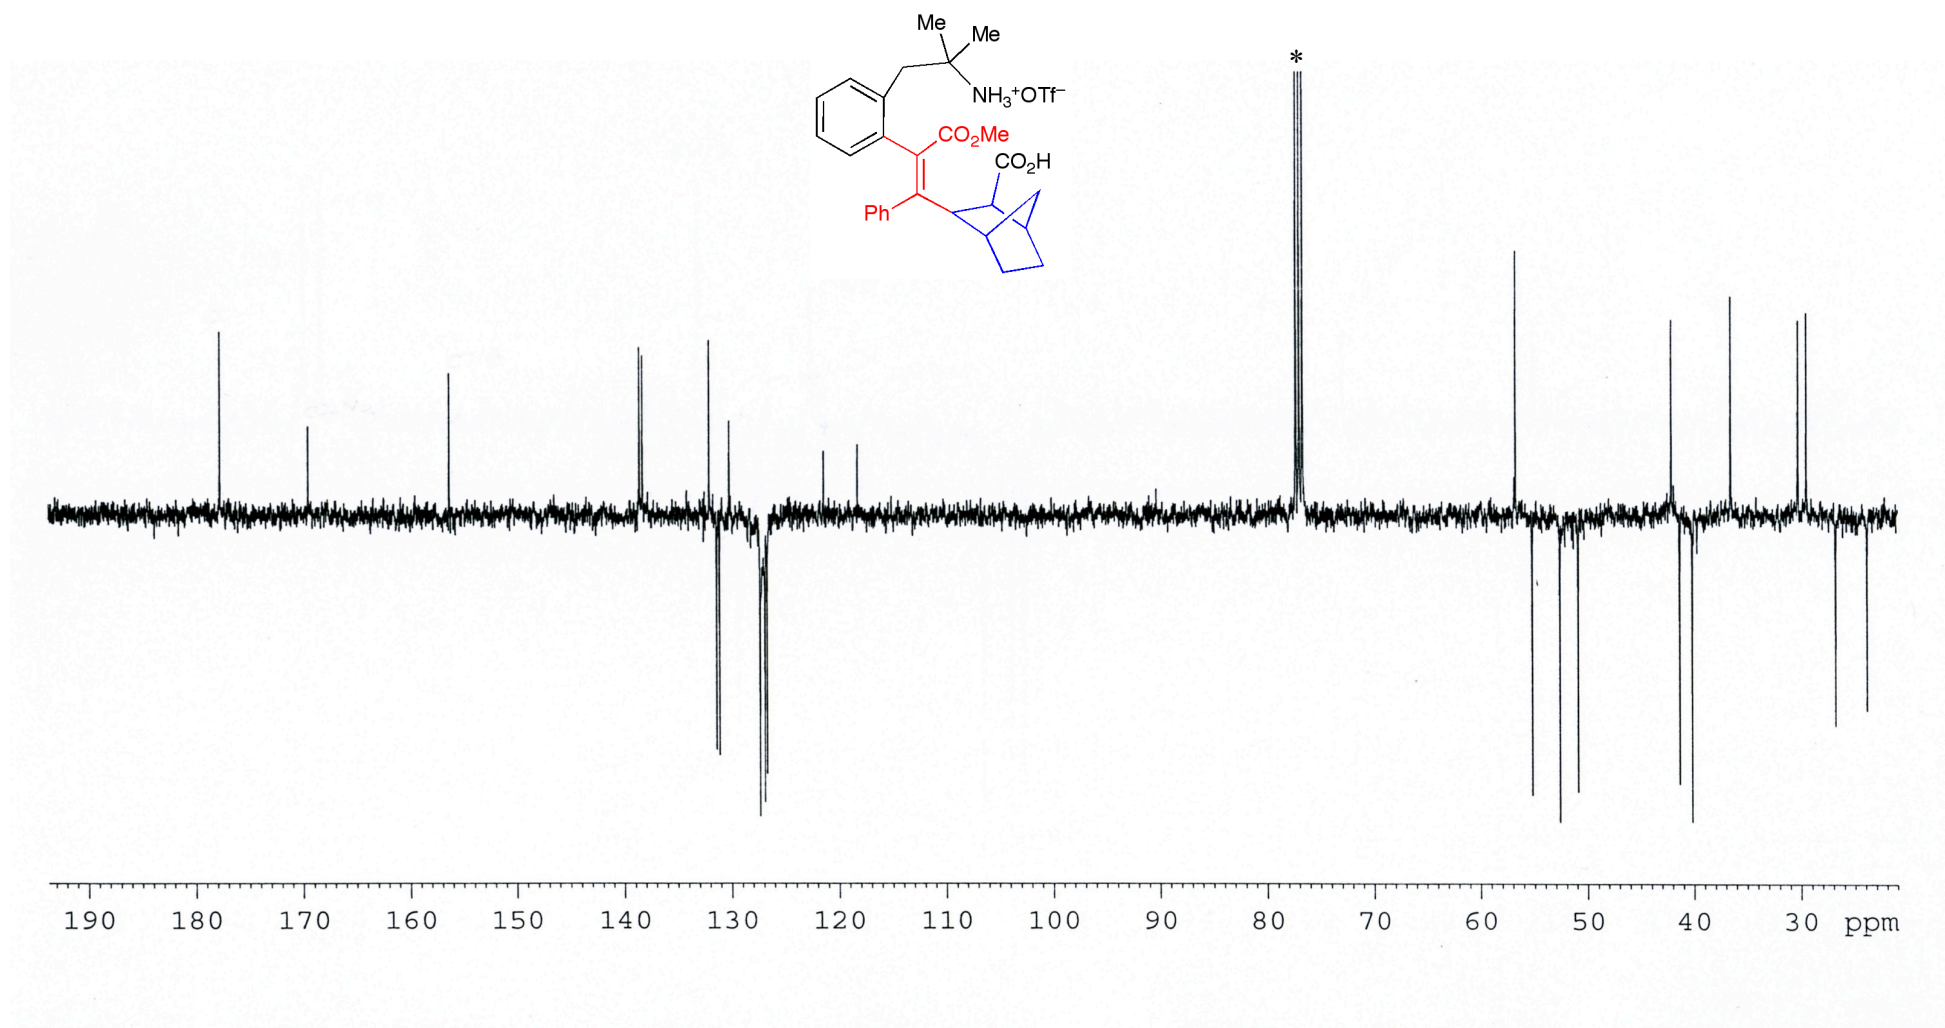

**Figure S68.**  $^{13}\text{C}\{^1\text{H}\}$  APT NMR spectrum of **10d** (100.8 MHz,  $\text{CDCl}_3$ , 25 °C)  
(The asterik indicates the signal corresponding to  $\text{CDCl}_3$ )
